# Supplementary material for: Palladium/silver reagent-promoted aryl phosphorylation: flexible synthesis of substituted-3-benzylidene-2-(2-(diphenylphosphoryl)-aryl)-isoindolin-1-one
Source: Royal Society of Chemistry journal article supplement (doi:10.1039/c7ra10902d), 2017-01-01
Supplement: c7ra10902d1.pdf [file c7ra10902d1.pdf]

# **Palladium/Silver Reagent-Promoted Aryl Phosphorylation: Flexible Synthesis of Substituted-3-Benzylidene-2-(2-(diphenylphosphoryl)-aryl)-isoindolin-1-one**

Peng Shi,<sup>†</sup> Qing Wang,<sup>†</sup> Xiao Zeng,<sup>††</sup> Yingsheng Zhao,<sup>\*†</sup> Runsheng Zeng<sup>\*†</sup>

<sup>†</sup>Key Laboratory of Organic Synthesis of Jiangsu Province, College of Chemistry Chemical Engineering and Materials Science, Soochow University, Suzhou, Jiangsu 215123, China.

<sup>††</sup>Department of Chemistry, National University of Singapore, Singapore

\*yszha@suda.edu.cn

\*zengrunsheng@suda.edu.cn

## **Table of contents**

|                                                                     |            |
|---------------------------------------------------------------------|------------|
| <b>1. General information.</b> .....                                | <b>S2</b>  |
| <b>2. Instrumentation</b> .....                                     | <b>S2</b>  |
| <b>3. Synthetic procedures and silver catalyzed mechanism</b> ..... | <b>S2</b>  |
| <b>4. Characterization data</b> .....                               | <b>S3</b>  |
| <b>5. NMR spectra</b> .....                                         | <b>S8</b>  |
| <b>6. References:</b> .....                                         | <b>S38</b> |

## 1. General information.

Unless otherwise noted, all reactions were carried out open to air atmosphere in the oven-dried glass tubes with magnetic stirring. All reagents and solvents were purchased for commercial suppliers. Analytical thin layer chromatography (TLC) was performed using Silica Gel 60 F 254 aluminum plates and visualized with UV light (254 nm). The pure products were obtained by means of column chromatography which was performed on silica gel (200-300 mesh).

## 2. Instrumentation.

The  $^1\text{H}$  NMR (400 MHz),  $^{13}\text{C}$  NMR (101 MHz),  $^{19}\text{F}$  NMR (376 MHz) and  $^{31}\text{P}$  NMR (162 MHz) spectra were recorded at 23 °C with DMSO- $d_6$  as solvent on a Bruker 400 spectrometer and tetramethylsilane (TMS) as internal standard. Chemical shifts were reported in ppm from internal TMS ( $\delta$ ), all coupling constants ( $J$  values) were reported in Hertz (Hz). High resolution mass spectra (HRMS) were obtained on a TOF machine (ESI-TOF).

## 3. Synthetic procedures and silver catalyzed mechanism

### 3.1 General procedure for synthesis of 3-benzylidene-2-phenylisoindolin-1-one (**1a**).<sup>[1]</sup>

A oven-dried Schlenk tube charged with a magnetic stirring bar was added 2-bromobenzamide (1.380 g, 5 mmol), CuI (95 mg, 0.5 mmol), L-proline (180 mg, 1.5 mmol) and potassium carbonate (1.380 g, 10 mmol), and the tube was evacuated and backfilled with argon (3 times), and then phenylacetylene (830  $\mu\text{l}$ , 7.5 mmol), and *i*-PrOH (10 mL) were added. The reaction mixture was stirred at 80 °C for 16 h. After removal of *i*-PrOH, the residues were filtrated with 20 ml water (3 times). The product (**1a**) was purified by regular column chromatography.

### 3.2 General procedure for Synthesis of 3-benzylidene-2-(2-(diphenylphosphoryl) phenyl) isoindolin-1-one (**3a**).

To a reaction tube equipped with a magnetic stirring bar were added (E)-3-benzylidene-2-phenylisoindolin-1-one (**1a**) (60 mg, 0.2 mmol),  $\text{HPOPh}_2$  (81 mg, 0.4 mmol),  $\text{Pd}(\text{OAc})_2$  (5 mg, 0.02 mmol),  $\text{Ag}_2\text{CO}_3$  (6 mg, 0.02 mmol) and  $\text{Mg}(\text{NO}_3)_2 \cdot 6\text{H}_2\text{O}$  (103 mg, 0.4 mmol), and then  $\text{CH}_3\text{CN}$  (2 ml) was added. The reaction mixture was stirred at 25 °C for 3h. Then the solvent was removed under vacuum, and the residues were

purified by regular column chromatography (petroleum ether: ethyl acetate: dichloromethane=2:1:1).

### 3.3 silver catalyzed mechanism

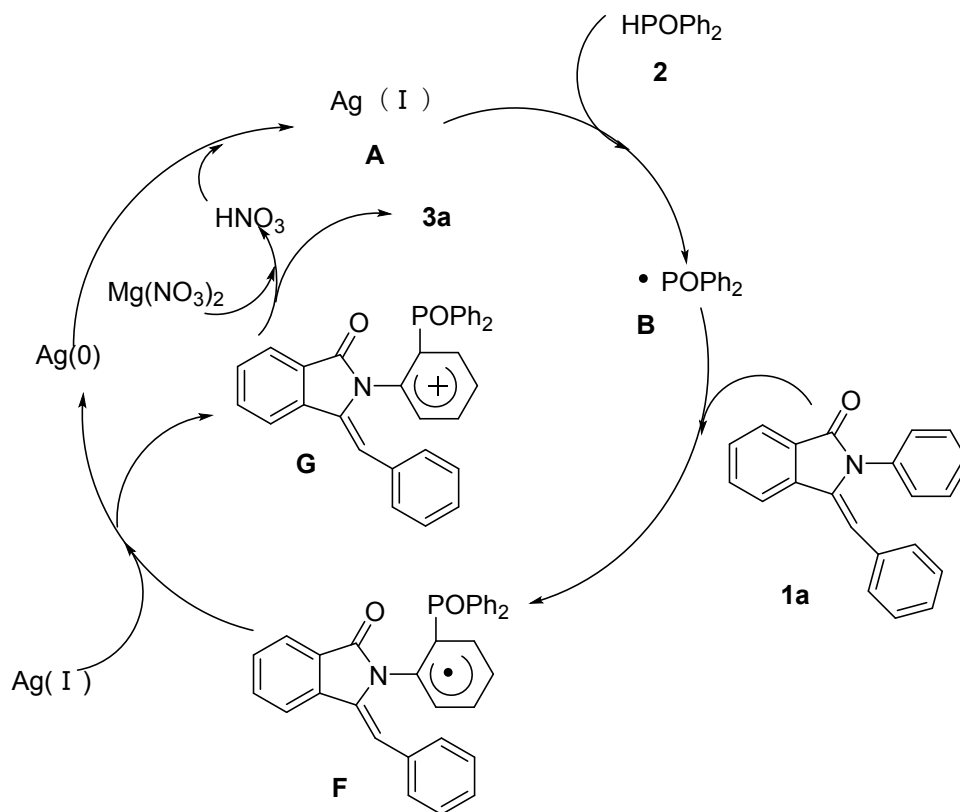

Initially, the diphenylphosphine oxide (**2**) was excited by Ag (I) (**A**) to generate the key intermediate P-centered radical (**B**), which then undergoes addition with substrate (**1a**) to form radical intermediate **F**. Thereafter, the radical intermediate **F** was oxidized by Ag (I) which can regenerate Ag (0) to produce the cation intermediate **G**. What's more, due to the presence of Mg(NO<sub>3</sub>)<sub>2</sub>, the cation intermediate **G** undergoes deprotonation to yield the corresponding product **3a** and generate HNO<sub>3</sub>. Finally, Ag (0) was able to be oxidized to Ag (I) by HNO<sub>3</sub> and complete the catalytic cycle.

## 4. Characterization data

### 4.1 3-benzylidene-2-(2-(diphenylphosphoryl)phenyl)isoindolin-1-one (3a)

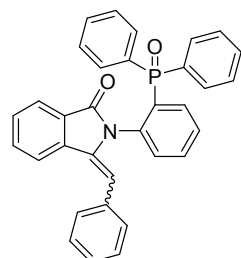

White solid, 78 mg (78 % yield), mp 145.2-146.1 °C; <sup>1</sup>H NMR (400 MHz, DMSO-d<sub>6</sub>) δ 8.94 (d, *J* = 7.7 Hz, 1H), 7.94 – 7.89 (m, 2H), 7.79 – 7.75 (m, 1H), 7.69 (d, *J* = 7.7 Hz, 2H), 7.59 (d, *J* = 8.9 Hz, 3H), 7.57 – 7.54 (m, 3H), 7.52 – 7.39 (m, 4H), 7.37 – 7.32 (m, 2H), 7.12 – 7.04 (m, 3H), 6.83 (t, *J* = 6.6 Hz, 2H), 4.65 (d, *J* = 10.3 Hz, 1H); <sup>31</sup>P NMR (162 MHz, DMSO-d<sub>6</sub>) δ 27.66 (s); <sup>13</sup>C NMR (101 MHz, DMSO-d<sub>6</sub>) δ 165.00 (s), 145.40 (s), 136.80 (s), 135.92 (s), 135.80 (s), 134.79 (s), 134.70 (s), 133.80 (s), 132.02 (s), 131.75 (s), 130.65 (s), 130.25 (s), 130.17 (s), 129.53 (s), 128.60 (s), 128.14 (s), 128.02 (s), 127.78 (s), 127.67 (s), 127.07 (s), 126.86 (s), 126.51 (s), 125.70 (s), 122.05 (s), 95.88 (s), 51.33 (s), 50.64 (s); HRMS(ESI-TOF): [M+H]<sup>+</sup> *m/z* calcd for C<sub>33</sub>H<sub>25</sub>NO<sub>2</sub>P<sup>+</sup>: 498.1623, found; 498.1629.

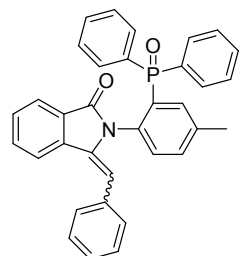

### 4.2 3-benzylidene-2-(2-(diphenylphosphoryl)-4-methylphenyl)isoindolin-1-one (3b)

White solid, 64 mg (62 % yield), mp 142.2-142.7 °C; <sup>1</sup>H NMR (400 MHz, DMSO-d<sub>6</sub>) δ 8.92 (d, *J* = 7.6 Hz, 1H), 7.95 – 7.83 (m, 2H), 7.75 (t, *J* = 7.3 Hz, 1H), 7.54 (d, *J* = 8.6 Hz, 5H), 7.49 – 7.44 (m, 2H), 7.41 (d, *J* = 7.3 Hz, 1H), 7.38 – 7.31 (m, 2H), 7.18 – 7.09 (m, 3H), 7.09 – 7.04 (m, 2H), 6.81 (d, *J* = 6.1 Hz, 3H), 4.61 (d, *J* = 10.1 Hz, 1H), 3.90 (s, 3H); <sup>31</sup>P NMR (162 MHz, DMSO-d<sub>6</sub>) δ 27.93 (s); <sup>13</sup>C NMR (101 MHz, DMSO-d<sub>6</sub>) δ 164.91 (s), 157.56 (s), 145.42 (s), 136.91 (s), 135.90 (s), 134.89 (s), 134.60 (s), 133.90 (s), 131.80 (s), 130.87 (s), 130.63 (s), 130.24 (s), 130.16 (s), 129.43 (s), 128.24 (s), 128.11 (s), 127.99 (s), 127.73 (s), 127.62 (s), 127.49 (s), 127.01 (s), 126.86 (s), 121.91 (s), 113.75 (s), 95.54 (s), 55.30 (s), 51.25 (s), 50.57 (s); HRMS(ESI-TOF): [M+H]<sup>+</sup> *m/z* calcd for C<sub>34</sub>H<sub>27</sub>NO<sub>2</sub>P<sup>+</sup>: 512.1779, found; 512.1780.

#### 4.3 3-benzylidene-2-(2-(diphenylphosphoryl)-4-methoxyphenyl)isoindolin-1-one (3c)

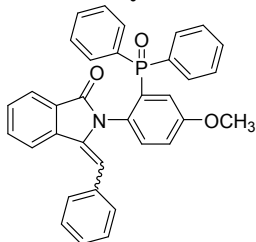

White solid, 69 mg (65 % yield), mp 168.2-168.9 °C; <sup>1</sup>H NMR (400 MHz, DMSO-d<sub>6</sub>) δ 8.97 (d, *J* = 7.7 Hz, 1H), 7.94 (dd, *J* = 9.8, 4.7 Hz, 2H), 7.78 (t, *J* = 7.4 Hz, 1H), 7.63 – 7.55 (m, 6H), 7.50 (t, *J* = 7.3 Hz, 1H), 7.47 – 7.42 (m, 2H), 7.41 – 7.35 (m, 3H), 7.11 (dd, *J* = 14.9, 6.4 Hz, 3H), 6.85 (d, *J* = 6.4 Hz, 2H), 4.69 (d, *J* = 10.2 Hz, 1H), 2.49 (s, 3H); <sup>31</sup>P NMR (162 MHz, DMSO-d<sub>6</sub>) δ 27.80 (s); <sup>13</sup>C NMR (101 MHz, DMSO-d<sub>6</sub>) δ 164.96 (s), 145.40 (s), 136.83 (s), 135.82 (s), 135.65 (s), 134.83 (s), 133.84 (s), 133.23 (s), 131.89 (s), 131.79 (s), 130.78 (s), 130.68 (s), 130.27 (s), 130.18 (s), 129.46 (s), 129.06 (s), 128.12 (s), 128.00 (s), 127.77 (s), 127.66 (s), 127.03 (s), 126.85 (s), 125.65 (s), 121.96 (s), 51.29 (s), 50.60 (s), 20.88 (s); HRMS(ESI-TOF): [M+H]<sup>+</sup> *m/z* calcd for C<sub>34</sub>H<sub>27</sub>NO<sub>3</sub>P<sup>+</sup>: 528.1779, found: 528.1741.

#### 4.4 3-benzylidene-2-(4-chloro-2-(diphenylphosphoryl)phenyl)isoindolin-1-one (3d)

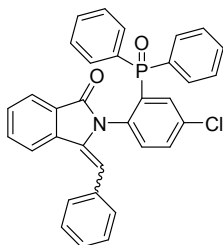

White solid, 87 mg (82 % yield), mp 163.1-163.5 °C; <sup>1</sup>H NMR (400 MHz, DMSO-d<sub>6</sub>) δ 8.97 (d, *J* = 7.7 Hz, 1H), 8.03 – 7.96 (m, 2H), 7.77 (t, *J* = 7.4 Hz, 1H), 7.71 (d, *J* = 8.8 Hz, 2H), 7.68 – 7.62 (m, 3H), 7.55 (s, 3H), 7.51 – 7.38 (m, 5H), 7.09 (dd, *J* = 14.5, 6.2 Hz, 3H), 6.81 (d, *J* = 6.1 Hz, 2H), 4.72 (d, *J* = 10.2 Hz, 1H); <sup>31</sup>P NMR (162 MHz, DMSO-d<sub>6</sub>) δ 27.67 (s); <sup>13</sup>C NMR (101 MHz, DMSO-d<sub>6</sub>) δ 164.97 (s), 145.34 (s), 136.85 (s), 135.84 (s), 134.92 (s), 134.76 (s), 133.77 (s), 132.17 (s), 131.85 (s), 131.82 (s), 130.70 (s), 130.41 (s), 130.33 (s), 130.30 (s), 130.21 (s), 129.59 (s), 128.68 (s), 128.17 (s), 128.05 (s), 127.72 (s), 127.61 (s), 127.06 (s), 126.95 (s), 122.08 (s), 96.09 (s), 51.30 (s), 50.62 (s); HRMS(ESI-TOF): [M+H]<sup>+</sup> *m/z* calcd for C<sub>33</sub>H<sub>24</sub>ClNO<sub>2</sub>P<sup>+</sup>: 532.1233, found: 532.1216.

#### 4.5 3-benzylidene-2-(2-(diphenylphosphoryl)-4-fluorophenyl)isoindolin-1-one (3e)

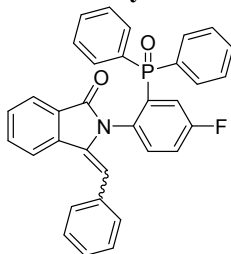

White solid, 78 mg (76 % yield), mp 152.1-152.4 °C; <sup>1</sup>H NMR (400 MHz, DMSO-d<sub>6</sub>) δ 8.97 (d, *J* = 7.7 Hz, 1H), 7.99 – 7.94 (m, 2H), 7.77 (dd, *J* = 10.6, 4.2 Hz, 1H), 7.69 (dd, *J* = 9.0, 5.1 Hz, 2H), 7.64 (s, 1H), 7.59 – 7.50 (m, 4H), 7.49 – 7.45 (m, 3H), 7.45 – 7.41 (m, 3H), 7.13 – 7.04 (m, 3H), 6.83 (t, *J* = 6.7 Hz, 2H), 4.67 (d, *J* = 10.3 Hz, 1H); <sup>31</sup>P NMR (162 MHz, DMSO) δ 27.84 (s); <sup>19</sup>F NMR (376 MHz, DMSO-d<sub>6</sub>) δ -114.58 (s); <sup>13</sup>C NMR (101 MHz, DMSO-d<sub>6</sub>) δ 165.45 (s), 162.56 (s), 160.13 (s), 145.67 (s), 136.97 (s), 136.31 (s), 135.96 (s), 135.14 (s), 134.15 (s), 132.61 (s), 131.25 (s), 131.15 (s), 130.91 (s), 130.71 (d, *J* = 8.3 Hz), 130.14 (s), 129.15 (s), 128.57 (d, *J* = 11.8 Hz), 128.35 (s), 128.24 (s), 127.29 (s), 127.04 (s), 126.17 (s), 122.61 (s), 114.42 (d, *J* = 21.1 Hz), 96.30 (s), 51.04 (s), 50.35 (s); HRMS(ESI-TOF): [M+H]<sup>+</sup> *m/z* calcd for C<sub>33</sub>H<sub>24</sub>FNO<sub>2</sub>P<sup>+</sup>: 516.1529, found: 516.1526.

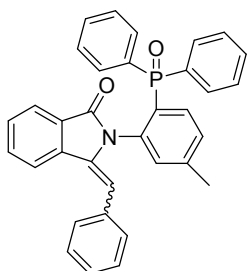

#### 4.6 3-benzylidene-2-(2-(diphenylphosphoryl)-5-methylphenyl)isoindolin-1-one (3f)

White solid, 88 mg (86 % yield), mp 138.4-138.9 °C; <sup>1</sup>H NMR (400 MHz, DMSO-d<sub>6</sub>) δ 9.00 (d, *J* = 7.7 Hz, 1H), 7.98 – 7.91 (m, 2H), 7.77 (t, *J* = 7.0 Hz, 1H), 7.61 (s, 1H), 7.55 (s, 4H), 7.53 – 7.40 (m, 5H), 7.39 – 7.34 (m, 2H), 7.27 (d, *J* = 6.8 Hz, 1H), 7.07 (dd, *J* = 13.9, 6.3 Hz, 3H), 6.82 (s, 2H), 4.68 (d, *J* = 10.3 Hz, 1H), 2.44 (s, 3H); <sup>31</sup>P NMR (162 MHz, DMSO-d<sub>6</sub>) δ 27.73 (s); <sup>13</sup>C NMR (101 MHz, DMSO-d<sub>6</sub>) δ 165.01 (s), 145.40 (s), 137.84 (s), 136.92 (s), 135.97 (s), 134.80 (s), 133.81 (s), 132.00 (s), 131.78 (s), 130.72 (s), 130.29 (s), 130.24 (s), 130.15 (s), 129.49 (s), 128.35 (s), 128.19 (s), 128.07 (s), 127.76 (s), 127.65 (s), 127.05 (s), 126.94 (s), 125.67 (s), 123.02 (s), 122.01 (s), 95.95 (s), 51.32 (s), 50.64 (s), 21.42 (s); HRMS(ESI-TOF): [M+H]<sup>+</sup> m/z calcd for C<sub>34</sub>H<sub>27</sub>NO<sub>2</sub>P<sup>+</sup>: 512.1779, found: 512.1784.

#### 4.7 3-benzylidene-2-(5-chloro-2-(diphenylphosphoryl)phenyl)isoindolin-1-one (3g)

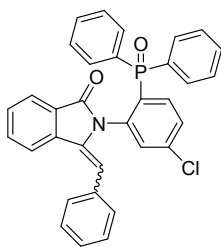

White solid, 78 mg (74 % yield), mp 159.2-159.9 °C; <sup>1</sup>H NMR (400 MHz, DMSO-d<sub>6</sub>) δ 9.02 (d, *J* = 7.5 Hz, 1H), 8.03 (s, 2H), 7.85 (s, 1H), 7.82 – 7.74 (m, 2H), 7.71 (d, *J* = 7.7 Hz, 1H), 7.65 – 7.54 (m, 4H), 7.53 – 7.40 (m, 5H), 7.16 – 7.02 (m, 3H), 6.75 (d, *J* = 58.3 Hz, 3H), 4.78 (d, *J* = 10.1 Hz, 1H); <sup>31</sup>P NMR (162 MHz, DMSO-d<sub>6</sub>) δ 27.56 (s); <sup>13</sup>C NMR (101 MHz, DMSO-d<sub>6</sub>) δ 165.01 (s), 145.30 (s), 137.58 (s), 136.92 (s), 135.91 (s), 134.72 (s), 133.73 (s), 133.10 (s), 132.34 (s), 131.84 (s), 130.64 (s), 130.33 (s), 130.23 (s), 130.11 (s), 129.66 (s), 128.31 (s), 128.19 (s), 127.74 (s), 127.63 (s), 127.01 (s), 126.08 (s), 124.15 (s), 123.96 (s), 122.17 (s), 96.31 (s), 51.22 (s), 50.53 (s); HRMS(ESI-TOF): [M+H]<sup>+</sup> m/z calcd for C<sub>33</sub>H<sub>24</sub>ClNO<sub>2</sub>P<sup>+</sup>: 532.1233, found: 532.1216.

#### 4.8 3-((diphenylphosphoryl)(phenyl)methylene)-2-(o-tolyl)isoindolin-1-one (3h)

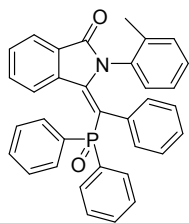

White solid, 63 mg (62 % yield), mp 218.6-219.4 °C; <sup>1</sup>H NMR (400 MHz, DMSO-d<sub>6</sub>) δ 8.84 (d, *J* = 8.0 Hz, 1H), 7.82 (d, *J* = 7.4 Hz, 1H), 7.60 – 7.52 (m, 3H), 7.51 (d, *J* = 2.8 Hz, 1H), 7.46 – 7.38 (m, 3H), 7.32 (dd, *J* = 7.6, 2.6 Hz, 3H), 7.26 (dd, *J* = 7.5, 2.6 Hz, 2H), 6.91 – 6.81 (m, 3H), 6.78 (d, *J* = 7.3 Hz, 1H), 6.61 (s, 3H), 6.45 (s, 2H), 1.94 (s, 3H); <sup>31</sup>P NMR (162 MHz, DMSO-d<sub>6</sub>) δ 29.63 (s); <sup>13</sup>C NMR (101 MHz, DMSO-d<sub>6</sub>) δ 167.30 (s), 147.18 (s), 147.03 (s), 135.85 (s), 135.60 (s), 135.16 (s), 134.88 (s), 133.42 (s), 132.32 (s), 132.17 (s), 131.71 (s), 131.59 (s), 131.49 (s), 130.77 (s), 129.87 (s), 129.70 (s), 128.88 (s), 128.48 (s), 128.27 (s), 128.15 (s), 128.03 (s), 127.73 (s), 126.13 (s), 125.88 (s), 122.97 (s), 117.73 (s), 116.78 (s), 17.79 (s); HRMS(ESI-TOF): [M+H]<sup>+</sup> m/z calcd for C<sub>34</sub>H<sub>27</sub>NO<sub>2</sub>P<sup>+</sup>: 512.1779, found: 512.1775.

#### 4.9 2-(2,6-dimethylphenyl)-3-((diphenylphosphoryl)(phenyl)methylene)isoindolin-1-one (3i)

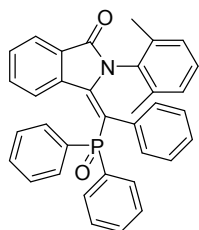

White solid, 42 mg (40 % yield), mp 226.1-226.6 °C; <sup>1</sup>H NMR (400 MHz, DMSO-d<sub>6</sub>) δ 8.96 (d, *J* = 7.5 Hz, 1H), 7.97 – 7.92 (m, 1H), 7.60 (s, 1H), 7.58 (d, *J* = 4.5 Hz, 2H), 7.56 – 7.48 (m, 3H), 7.39 (t, *J* = 6.9 Hz, 2H), 7.28 (td, *J* = 7.6, 2.9 Hz, 4H), 6.82 – 6.77 (m, 1H), 6.70 – 6.63 (m, 3H), 6.54 (d, *J* = 5.1 Hz, 4H), 2.10 (s, 6H); <sup>31</sup>P NMR (162 MHz, DMSO-d<sub>6</sub>) δ 29.77 (s); <sup>13</sup>C NMR (101 MHz, DMSO-d<sub>6</sub>) δ 166.74 (s), 145.67 (s), 145.52 (s), 135.95 (s), 134.82 (s), 134.59 (s), 134.00 (s), 133.30 (s), 132.22 (s), 131.61 (s), 131.51 (s), 131.45 (s), 130.79 (s), 129.30 (s), 128.77 (s), 128.69 (s), 128.23 (s), 128.11 (s), 127.98 (s), 127.51 (s), 126.42 (s), 126.32 (s), 123.01 (s), 117.42 (s), 116.47 (s), 18.11 (s); HRMS(ESI-TOF): [M+H]<sup>+</sup> m/z calcd for C<sub>35</sub>H<sub>29</sub>NO<sub>2</sub>P<sup>+</sup>: 526.1936, found: 526.1946.

#### 4.10 3-((diphenylphosphoryl)(phenyl)methylene)-2-(naphthalen-1-yl)isoindolin-1-one (3j)

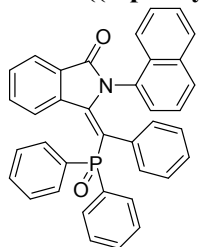

White solid, 50 mg (46 % yield), mp 198.1-198.6 °C; <sup>1</sup>H NMR (400 MHz, DMSO-d<sub>6</sub>) δ 8.92 (d, *J* = 7.9 Hz, 1H), 7.87 (d, *J* = 7.3 Hz, 1H), 7.73 (d, *J* = 8.0 Hz, 1H), 7.64 (t, *J* = 7.4 Hz, 1H), 7.59 (d, *J* = 7.9 Hz, 1H), 7.55 (d, *J* = 8.1 Hz, 1H), 7.51 (d, *J* = 3.5 Hz, 2H), 7.47 –

7.41 (m, 3H), 7.40 (s, 1H), 7.35 (d,  $J = 9.8$  Hz, 3H), 7.27 (d,  $J = 6.4$  Hz, 4H), 7.17 (d,  $J = 7.0$  Hz, 1H), 7.14 – 7.09 (m, 1H), 6.51 (d,  $J = 6.8$  Hz, 1H), 6.41 (t,  $J = 7.2$  Hz, 1H), 6.29 (s, 1H), 5.79 (s, 2H);  $^{31}\text{P}$  NMR (162 MHz, DMSO- $d_6$ )  $\delta$  29.72 (s);  $^{13}\text{C}$  NMR (101 MHz, DMSO- $d_6$ )  $\delta$  167.82 (s), 147.55 (s), 147.40 (s), 135.09 (s), 135.05 (s), 134.38 (s), 134.33 (s), 133.37 (s), 133.31 (s), 133.20 (s), 133.13 (s), 132.29 (d,  $J = 7.2$  Hz), 131.57 (dd,  $J = 9.3, 5.1$  Hz), 131.40 (s), 130.90 (s), 130.32 (s), 129.71 (s), 128.85 (s), 128.60 (s), 128.10 (dd,  $J = 11.8, 3.8$  Hz), 127.87 (s), 126.36 (s), 125.95 (s), 125.55 (s), 125.30 (s), 125.04 (s), 123.10 (s), 122.73 (s), 117.99 (s), 117.04 (s); HRMS(ESI-TOF):  $[\text{M}+\text{H}]^+$   $m/z$  calcd for  $\text{C}_{37}\text{H}_{27}\text{NO}_2\text{P}^+$ : 548.1779, found: 548.1777.

#### 4.11 2-(2-(diphenylphosphoryl)phenyl)-3-(4-methylbenzylidene)isoindolin-1-one (3k)

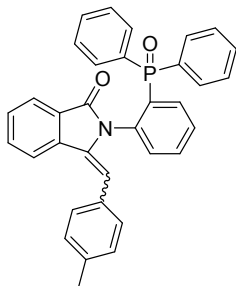

White solid, 62mg (61 % yield), mp 166.3-167.1 °C;  $^1\text{H}$  NMR (400 MHz, DMSO- $d_6$ )  $\delta$  8.96 (d,  $J = 7.7$  Hz, 1H), 7.95 – 7.87 (m, 2H), 7.78 – 7.70 (m, 3H), 7.61 – 7.56 (m, 3H), 7.53 (d,  $J = 1.8$  Hz, 3H), 7.46 (dd,  $J = 12.8, 6.6$  Hz, 3H), 7.38 – 7.32 (m, 2H), 7.12 – 7.03 (m, 3H), 6.56 (s, 2H), 4.64 (d,  $J = 10.4$  Hz, 1H), 1.94 (s, 3H);  $^{31}\text{P}$  NMR (162 MHz, DMSO- $d_6$ )  $\delta$  27.80 (s);  $^{13}\text{C}$  NMR (101 MHz, DMSO- $d_6$ )  $\delta$  165.08 (s), 145.51 (s), 137.01 (s), 136.03 (s), 135.97 (s), 134.91 (s), 133.92 (s), 132.00 (s), 130.68 (s), 130.63 (s), 130.31 (s), 130.21 (s), 130.13 (s), 129.48 (s), 128.58 (s), 128.11 (s), 127.99 (s), 127.81 (s), 127.68 (d,  $J = 3.6$  Hz), 127.66 (s), 126.87 (s), 126.50 (s), 125.71 (s), 95.96 (s), 50.84 (s), 50.02 – 48.66 (m), 20.38 (s); HRMS(ESI-TOF):  $[\text{M}+\text{H}]^+$   $m/z$  calcd for  $\text{C}_{34}\text{H}_{27}\text{NO}_2\text{P}^+$ : 512.1779, found: 512.1763.

#### 4.12 2-(2-(diphenylphosphoryl)phenyl)-3-(4-methoxybenzylidene)isoindolin-1-one (3l)

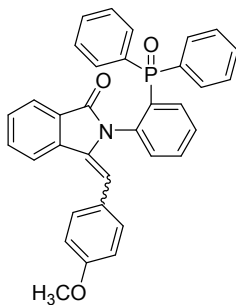

White solid, 88 mg (84 % yield), mp 171.1-171.5 °C;  $^1\text{H}$  NMR (400 MHz, DMSO- $d_6$ )  $\delta$  8.95 (d,  $J = 7.7$  Hz, 1H), 7.91 (dd,  $J = 9.7, 4.8$  Hz, 2H), 7.80 – 7.69 (m, 3H), 7.58 (dd,  $J = 18.5, 11.0$  Hz, 6H), 7.47 (dd,  $J = 15.9, 6.7$  Hz, 3H), 7.39 – 7.31 (m, 2H), 7.09 (dd,  $J = 12.4, 6.5$  Hz, 3H), 6.33 (s, 2H), 4.60 (d,  $J = 10.6$  Hz, 1H), 3.45 (s, 3H);  $^{31}\text{P}$  NMR (162 MHz, DMSO- $d_6$ )  $\delta$  28.04 (s);  $^{13}\text{C}$  NMR (101 MHz, DMSO- $d_6$ )  $\delta$  165.57 (s), 158.34 (s), 145.99 (s), 137.48 (s), 136.45 (s), 135.47 (s), 134.48 (s), 132.48 (s), 131.20 (s), 131.10 (s), 130.68 (s), 130.61 (s), 129.97 (s), 129.07 (s), 128.57 (s), 128.46 (s), 128.29 (s), 128.18 (s), 127.30 (s), 126.98 (s), 126.22 (s), 123.90 (s), 122.56 (s), 112.88 (s), 96.48 (s), 55.11 (s), 50.85 (s), 50.16 (s); HRMS(ESI-TOF):  $[\text{M}+\text{H}]^+$   $m/z$  calcd for  $\text{C}_{34}\text{H}_{27}\text{NO}_3\text{P}^+$ : 528.1779, found: 528.1734.

#### 4.13 3-(4-chlorobenzylidene)-2-(2-(diphenylphosphoryl)phenyl)isoindolin-1-one (3m)

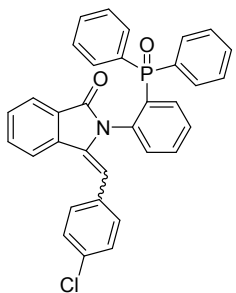

White solid, 61 mg (58% yield), mp 147.5-147.9 °C;  $^1\text{H}$  NMR (400 MHz, DMSO- $d_6$ )  $\delta$  8.90 (d,  $J = 7.7$  Hz, 1H), 7.94 – 7.89 (m, 2H), 7.77 (t,  $J = 6.8$  Hz, 1H), 7.69 – 7.64 (m, 3H), 7.60 – 7.53 (m, 5H), 7.50 (s, 1H), 7.49 – 7.44 (m, 3H), 7.44 – 7.36 (m, 3H), 7.15 (d,  $J = 6.9$  Hz, 1H), 7.10 (d,  $J = 5.3$  Hz, 2H), 4.67 (d,  $J = 10.2$  Hz, 1H);  $^{31}\text{P}$  NMR (162 MHz, DMSO- $d_6$ )  $\delta$  27.52 (s);  $^{13}\text{C}$  NMR (101 MHz, DMSO- $d_6$ )  $\delta$  164.93 (s), 145.08 (s), 135.75 (s), 134.69 (s), 134.57 (s), 132.16 (s), 131.78 (s), 130.60 (s), 130.25 (s), 129.71 (s), 128.83 (s), 128.68 (s), 128.49 (s), 128.16 (s), 128.04 (s), 127.93 (s), 127.82 (s), 127.40 (s), 127.07 (s), 126.80 (s), 126.58 (s), 125.68 (s), 123.41 (s), 122.14 (s), 95.71 (s), 50.70 (s), 50.02 (s); HRMS(ESI-TOF):  $[\text{M}+\text{H}]^+$   $m/z$  calcd for  $\text{C}_{33}\text{H}_{24}\text{ClNO}_2\text{P}^+$ : 532.1233, found: 532.1234.

#### 4.14 2-(2-(diphenylphosphoryl)phenyl)-3-(4-fluorobenzylidene)isoindolin-1-one (3n)

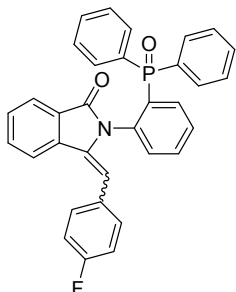

White solid, 55 mg (54 % yield), mp 156.8-157.2 °C;  $^1\text{H}$  NMR (400 MHz, DMSO- $d_6$ )  $\delta$  8.93 (d,  $J = 7.7$  Hz, 1H), 7.98 – 7.89 (m, 2H), 7.71 (dd,  $J = 23.9, 16.3$  Hz, 5H), 7.63 – 7.51 (m, 6H), 7.48 (dd,  $J = 13.0, 6.7$  Hz, 3H), 7.38 (dd,  $J = 9.5, 8.1$  Hz, 2H), 7.16 – 7.05 (m, 3H), 4.68 (d,  $J = 10.4$  Hz, 1H);  $^{19}\text{F}$  NMR (376 MHz, DMSO- $d_6$ )  $\delta$  -114.58 (s);

$^{31}\text{P}$  NMR (162 MHz, DMSO- $d_6$ )  $\delta$  27.84 (s);  $^{13}\text{C}$  NMR (101 MHz, DMSO- $d_6$ )  $\delta$  165.45 (s), 145.67 (s), 136.97 (s), 136.31 (s), 135.96 (s), 135.14 (s), 134.15 (s), 132.61 (s), 131.25 (s), 131.15 (s), 130.91 (s), 130.76 (s), 130.67 (s), 130.14 (s), 129.15 (s), 128.63 (s), 128.51 (s), 128.35 (s), 128.24 (s), 127.29 (s), 127.04 (s), 126.17 (s), 122.61 (s), 114.42 (d,  $J = 21.1$  Hz), 96.30 (s), 51.04 (s), 50.35 (s); HRMS(ESI-TOF):  $[\text{M}+\text{H}]^+$   $m/z$  calcd for  $\text{C}_{33}\text{H}_{24}\text{FNO}_2\text{P}^+$ : 516.1529, found: 516.1538.

#### 4.15 3-(2-chlorobenzylidene)-2-(2-(diphenylphosphoryl)phenyl)isoindolin-1-one (3o)

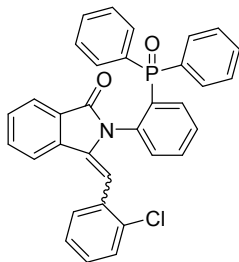

White solid, 72 mg (68 % yield), mp 132.4-132.8 °C;  $^1\text{H}$  NMR (400 MHz, DMSO- $d_6$ )  $\delta$  8.95 (d,  $J = 7.8$  Hz, 1H), 8.12 – 7.96 (m, 2H), 7.88 – 7.78 (m, 1H), 7.71 (s, 1H), 7.66 (d,  $J = 1.1$  Hz, 1H), 7.63 (d,  $J = 7.7$  Hz, 2H), 7.58 (t,  $J = 6.9$  Hz, 2H), 7.44 (t,  $J = 7.8$  Hz, 2H), 7.31 (t,  $J = 7.3$  Hz, 1H), 7.20 – 7.13 (m, 3H), 7.06 – 6.99 (m, 2H), 6.95 – 6.89 (m, 1H), 6.85 (d,  $J = 7.8$  Hz, 1H), 6.78 – 6.70 (m, 2H), 5.31 (d,  $J = 11.3$  Hz, 1H);  $^{31}\text{P}$  NMR (162 MHz, DMSO- $d_6$ )  $\delta$  29.27 (s);  $^{13}\text{C}$  NMR (101 MHz, DMSO- $d_6$ )  $\delta$  164.86 (s), 145.31 (s), 136.19 (s), 135.13 (s), 134.77 (s), 133.77 (s), 133.39 (s), 132.39 (s), 132.26 (s), 131.27 (s), 130.97 (s), 130.76 (s), 130.48 (s), 130.39 (s), 129.92 (s), 129.41 (s), 129.05 (s), 128.83 (s), 128.38 (s), 127.36 (s), 125.95 (s), 125.62 (s), 124.78 (s), 122.24 (s), 96.17 (s), 47.61 (s), 46.94 (s); HRMS(ESI-TOF):  $[\text{M}+\text{H}]^+$   $m/z$  calcd for  $\text{C}_{33}\text{H}_{24}\text{ClNO}_2\text{P}^+$ : 532.1233, found: 532.1221.

#### 4.16 3-benzylidene-2-(2-(diphenylphosphoryl)phenyl)-5-methylisoindolin-1-one (3p)

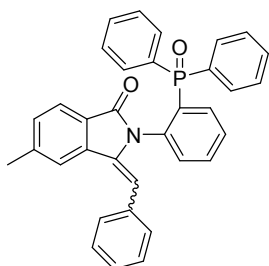

White solid, 68 mg (67 % yield), mp 158.2-158.9 °C;  $^1\text{H}$  NMR (400 MHz, DMSO- $d_6$ )  $\delta$  8.76 (s, 1H), 7.98 – 7.84 (m, 2H), 7.69 (d,  $J = 7.7$  Hz, 2H), 7.61 – 7.50 (m, 6H), 7.44 (t,  $J = 7.3$  Hz, 1H), 7.35 (dd,  $J = 12.6, 8.2$  Hz, 3H), 7.29 (d,  $J = 7.6$  Hz, 1H), 7.07 (dd,  $J = 8.0, 6.0$  Hz, 3H), 6.87 – 6.72 (m, 3H), 4.65 (d,  $J = 10.4$  Hz, 1H), 2.54 (s, 3H);  $^{31}\text{P}$  NMR (162 MHz, DMSO- $d_6$ )  $\delta$  27.68 (s);  $^{13}\text{C}$  NMR (101 MHz, DMSO- $d_6$ )  $\delta$  165.03 (s), 145.75 (s), 142.10 (s), 136.84 (s), 136.06 (s), 135.84 (s), 134.86 (s), 133.87 (s), 131.79 (s), 130.68 (s), 130.18 (s), 128.55 (s), 128.25 (s), 128.12 (s), 128.01 (s), 127.78 (s), 127.67 (s), 127.16 (s), 127.03 (s), 126.38 (s), 125.70 (s), 121.98 (s), 95.73 (s), 51.34 (s), 50.65 (s), 21.93 (s); HRMS(ESI-TOF):  $[\text{M}+\text{H}]^+$   $m/z$  calcd for  $\text{C}_{34}\text{H}_{27}\text{NO}_2\text{P}^+$ : 512.1779, found: 512.1777.

#### 4.17 3-benzylidene-5-chloro-2-(2-(diphenylphosphoryl)phenyl)isoindolin-1-one (3q)

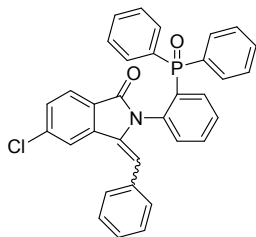

White solid, 68 mg (64 % yield), mp 162.7-163.2 °C;  $^1\text{H}$  NMR (400 MHz, DMSO- $d_6$ )  $\delta$  9.10 (s, 1H), 7.93 (dd,  $J = 6.3, 4.5$  Hz, 2H), 7.80 (s, 1H), 7.68 (d,  $J = 7.8$  Hz, 2H), 7.58 (dd,  $J = 15.6, 7.3$  Hz, 6H), 7.50 – 7.44 (m, 2H), 7.44 – 7.36 (m, 2H), 7.09 (dd,  $J = 14.4, 6.2$  Hz, 3H), 6.85 (d,  $J = 5.3$  Hz, 3H), 4.69 (d,  $J = 10.1$  Hz, 1H);  $^{31}\text{P}$  NMR (162 MHz, DMSO- $d_6$ )  $\delta$  28.15 (s);  $^{13}\text{C}$  NMR (101 MHz, DMSO- $d_6$ )  $\delta$  164.44 (s), 147.74 (s), 137.49 (s), 137.12 (s), 136.11 (s), 134.94 (s), 133.95 (s), 132.05 (s), 131.26 (s), 130.91 (s), 130.75 (d,  $J = 8.3$  Hz), 130.61 (d,  $J = 8.5$  Hz), 130.33 (s), 129.94 (s), 129.18 (s), 128.68 (s), 128.56 (s), 128.31 (s), 128.20 (s), 127.74 (s), 127.50 (s), 127.19 (s), 126.02 (s), 124.43 (s), 95.97 (s), 51.52 (s), 50.84 (s); HRMS(ESI-TOF):  $[\text{M}+\text{H}]^+$   $m/z$  calcd for  $\text{C}_{33}\text{H}_{24}\text{ClNO}_2\text{P}^+$ : 532.1233, found: 532.1218.

#### 4.18 3-benzylidene-2-(2-(diphenylphosphoryl)phenyl)-6-methylisoindolin-1-one (3r)

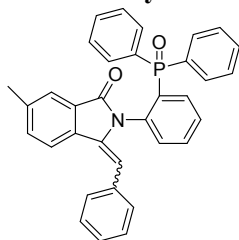

White solid, 63 mg (62 % yield), mp 166.5-167.2 °C;  $^1\text{H}$  NMR (400 MHz, DMSO- $d_6$ )  $\delta$  8.82 (d,  $J = 7.8$  Hz, 1H), 7.92 (dd,  $J = 9.8, 4.6$  Hz, 2H), 7.70 (d,  $J = 7.8$  Hz, 2H), 7.62 – 7.50 (m, 7H), 7.47 – 7.42 (m, 1H), 7.38 – 7.31 (m, 2H), 7.27 (s, 1H), 7.07 (dd,  $J = 14.4, 6.3$  Hz, 3H), 6.87 – 6.71 (m, 3H), 4.66 (d,  $J = 10.3$  Hz, 1H), 2.36 (s, 3H);  $^{31}\text{P}$  NMR (162 MHz, DMSO- $d_6$ )  $\delta$  27.74 (s);  $^{13}\text{C}$  NMR (101 MHz, DMSO- $d_6$ )  $\delta$  165.61 (s), 143.27 (s), 139.58 (s), 137.32 (s), 136.55 (s), 136.32 (s), 135.32 (s), 134.34 (s), 133.26

(s), 132.32 (s), 132.29 (s), 131.37 (s), 131.14 (s), 130.71 (s), 129.03 (s), 128.60 (s), 128.48 (s), 128.23 (s), 128.12 (s), 127.52 (s), 127.17 (s), 126.88 (s), 126.13 (s), 122.69 (s), 96.27 (s), 51.89 (s), 51.20 (s), 21.35 (s); HRMS(ESI-TOF):  $[M+H]^+$   $m/z$  calcd for  $C_{34}H_{27}NO_2P^+$ : 512.1779, found: 512.1766.

#### 4.19 3-benzylidene-6-chloro-2-(2-(diphenylphosphoryl)phenyl)isoindolin-1-one(3s)

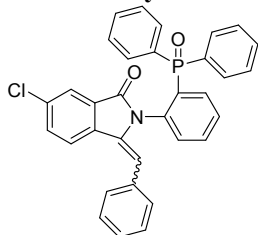

White solid, 64 mg (60% yield), mp 148.9-149.4 °C;  $^1H$  NMR (400 MHz, DMSO- $d_6$ )  $\delta$  9.00 (d,  $J = 8.3$  Hz, 1H), 7.96 – 7.89 (m, 2H), 7.86 (dd,  $J = 8.3, 1.8$  Hz, 1H), 7.79 (s, 1H), 7.71 (d,  $J = 7.9$  Hz, 2H), 7.62 – 7.53 (m, 5H), 7.47 (dd,  $J = 8.6, 4.6$  Hz, 2H), 7.42 – 7.35 (m, 2H), 7.08 (dd,  $J = 15.9, 6.3$  Hz, 3H), 6.85 (d,  $J = 6.0$  Hz, 3H), 4.69 (d,  $J = 10.2$  Hz, 1H);  $^{31}P$  NMR (162 MHz, DMSO- $d_6$ )  $\delta$  28.02 (s);  $^{13}C$  NMR (101 MHz, DMSO- $d_6$ )  $\delta$  163.67 (s), 144.09 (s), 136.63 (s), 135.62 (s), 134.52 (s), 134.39 (s), 133.53 (s), 132.72 (s), 132.09 (s), 131.58 (s), 130.76 (s), 130.39 (s), 130.27 (s), 130.20 (s), 128.91 (s), 128.71 (s), 128.17 (s), 128.05 (s), 127.82 (s), 127.71 (s), 127.27 (s), 126.79 (s), 125.61 (s), 121.79 (s), 95.79 (s), 51.17 (s), 50.49 (s); HRMS(ESI-TOF):  $[M+H]^+$   $m/z$  calcd for  $C_{33}H_{24}ClNO_2P^+$ : 532.1233, found: 532.1220.

#### 5. IR spectra (3d).

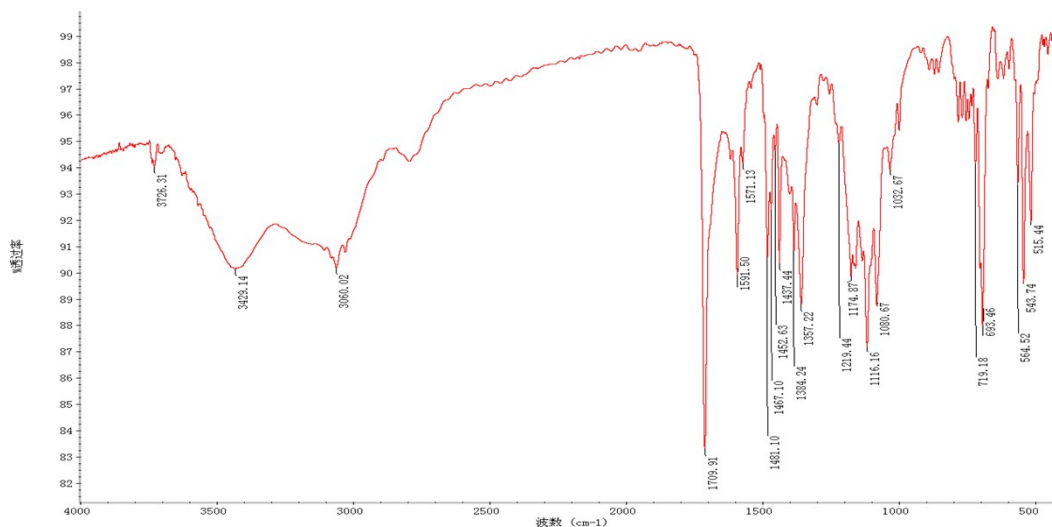

#### 6. NMR spectra.

3a



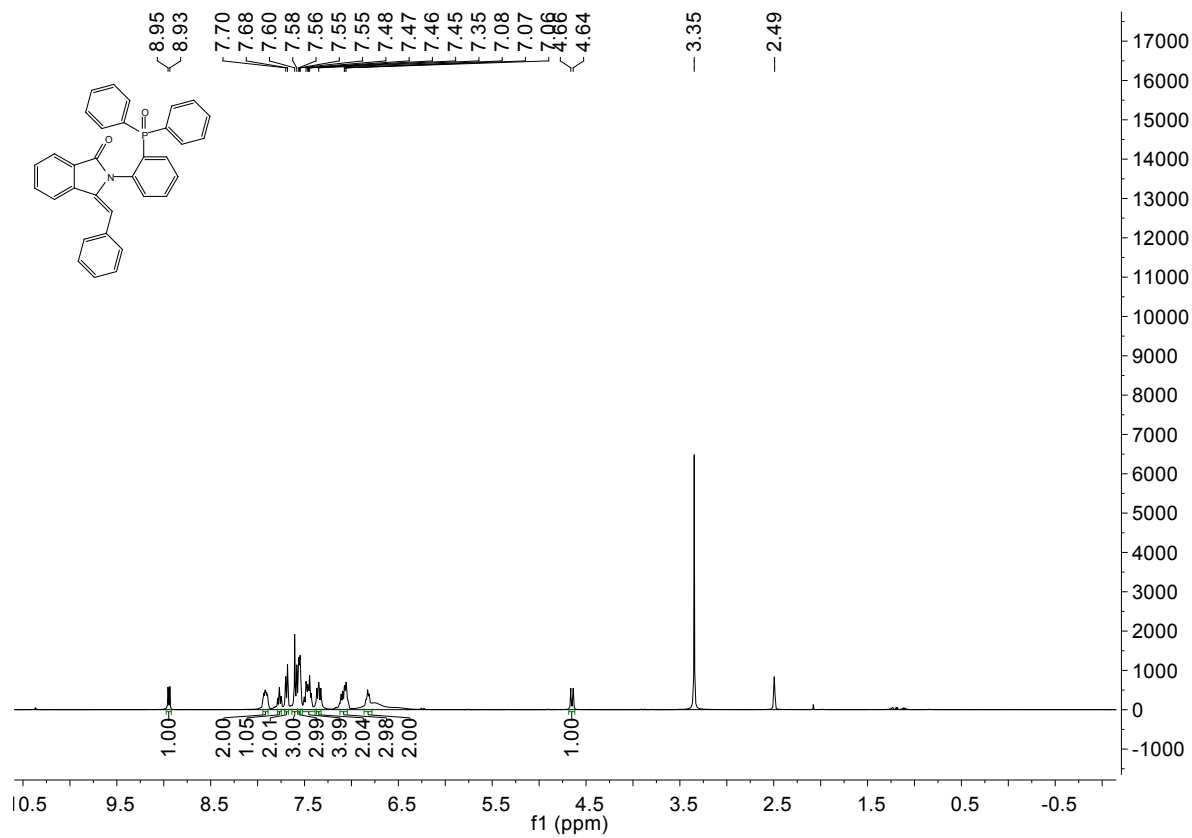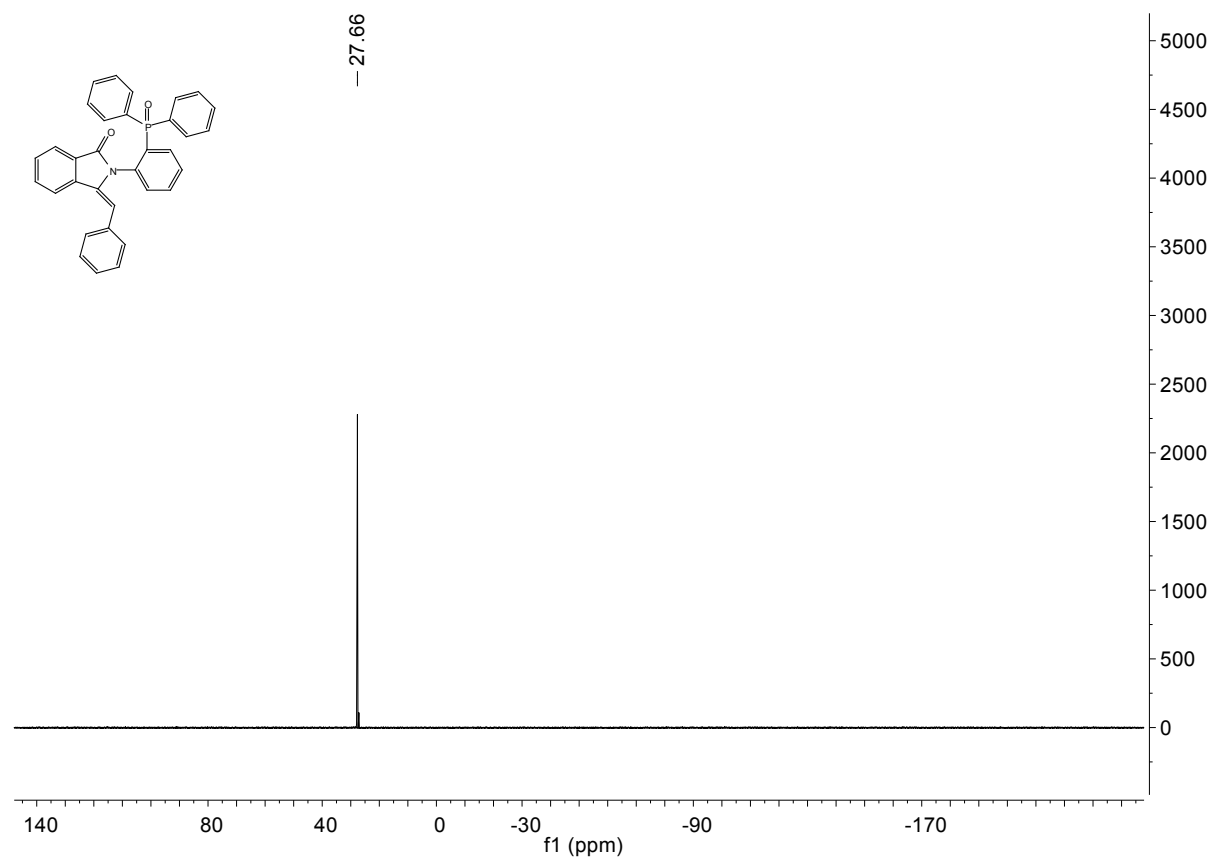

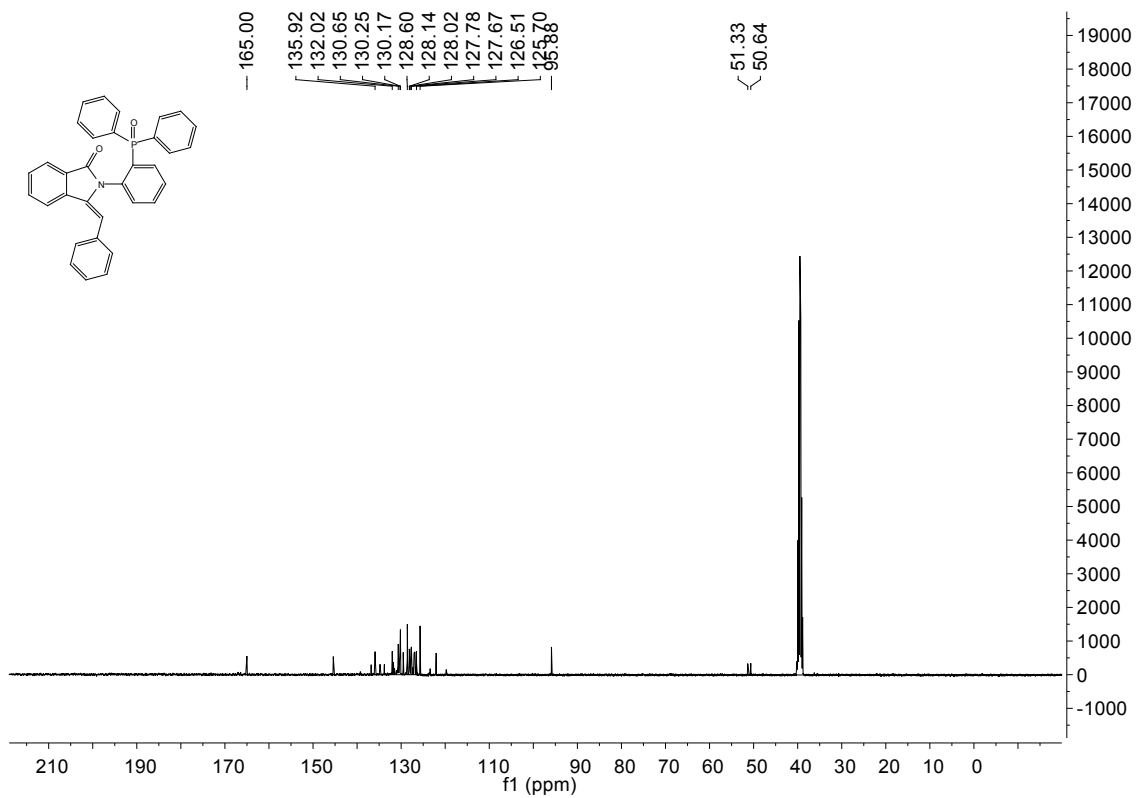

3b

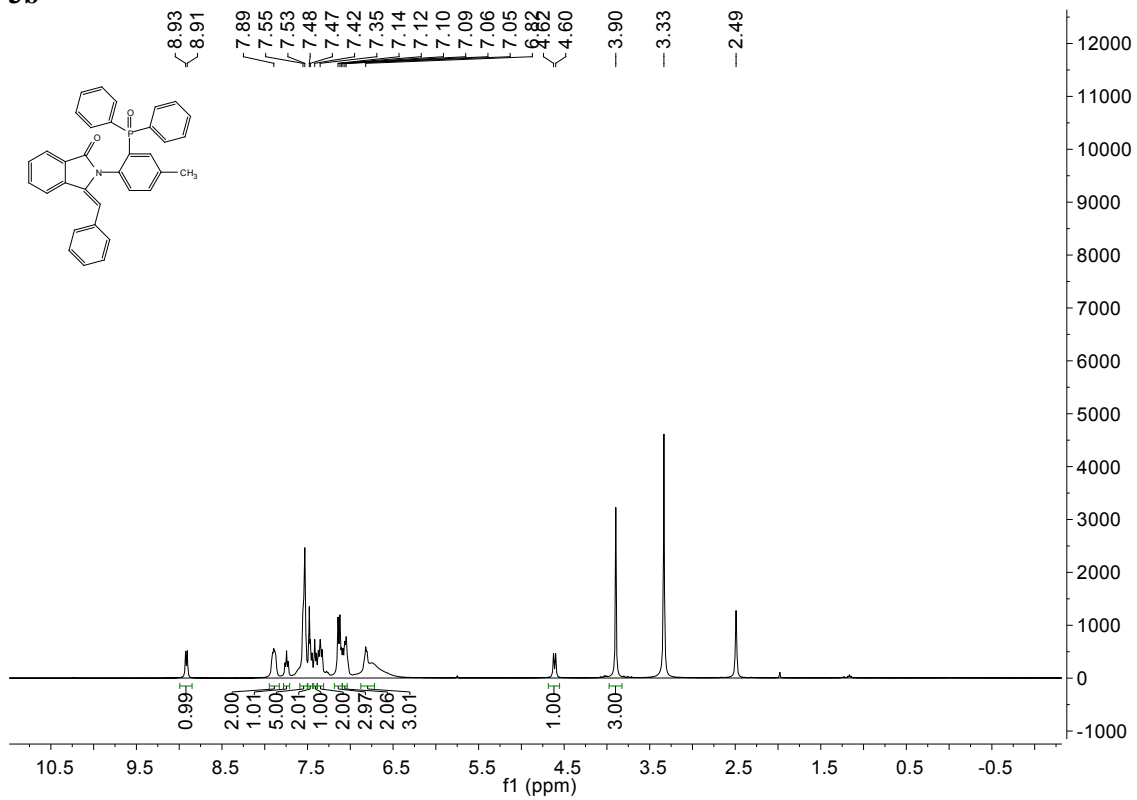

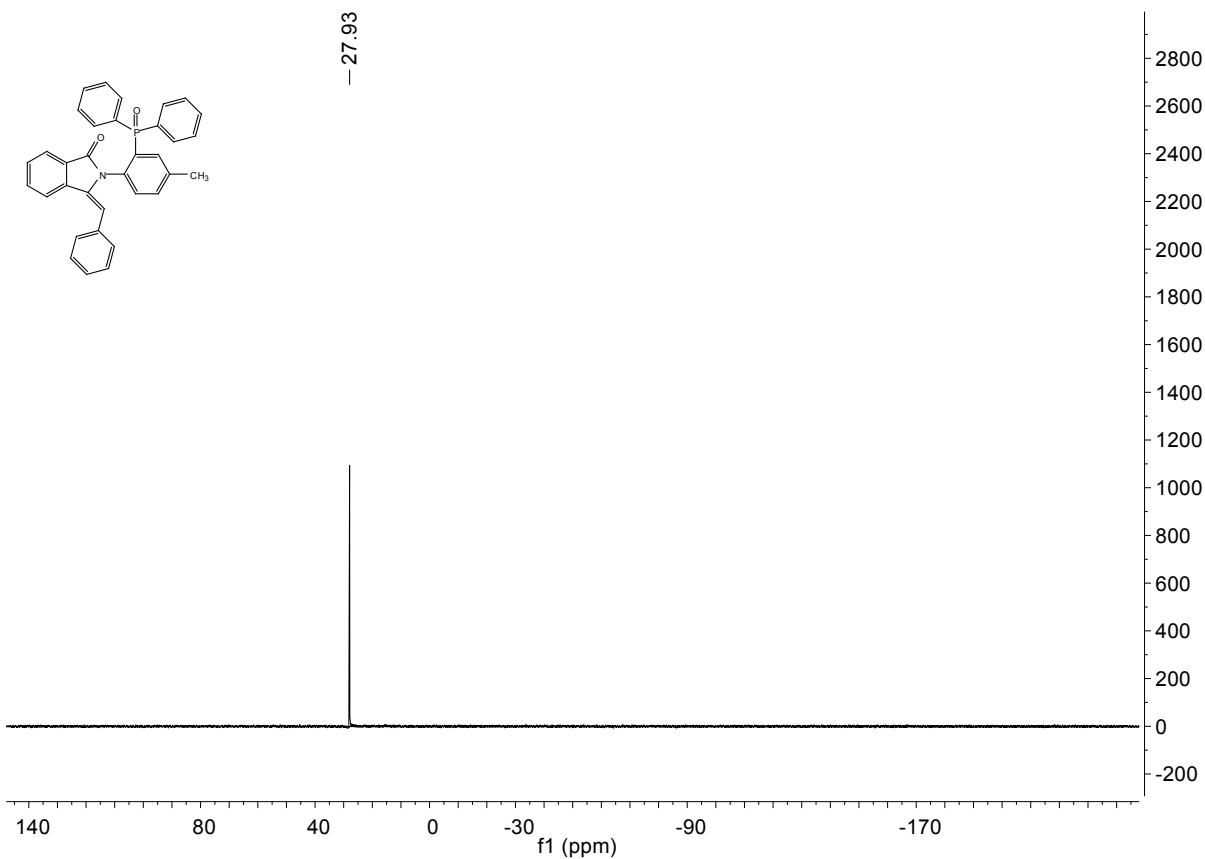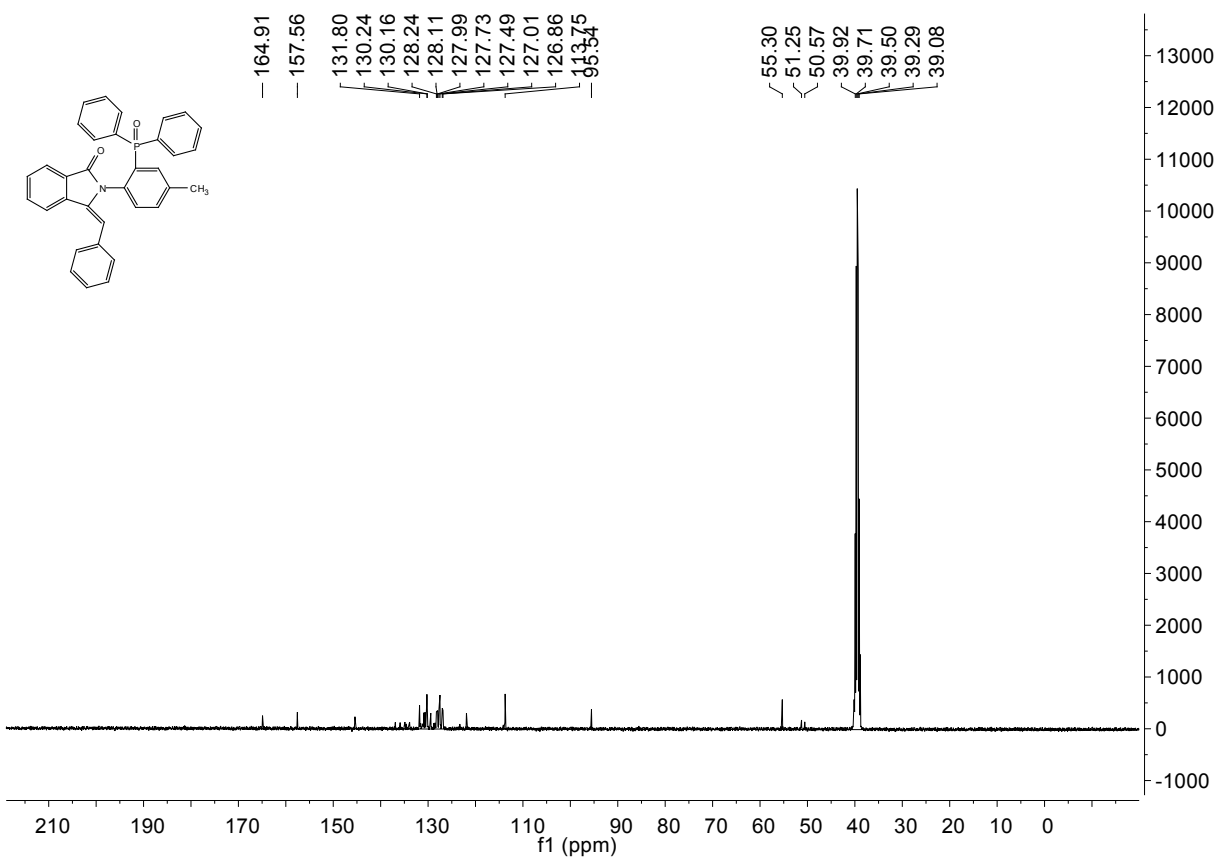

3c

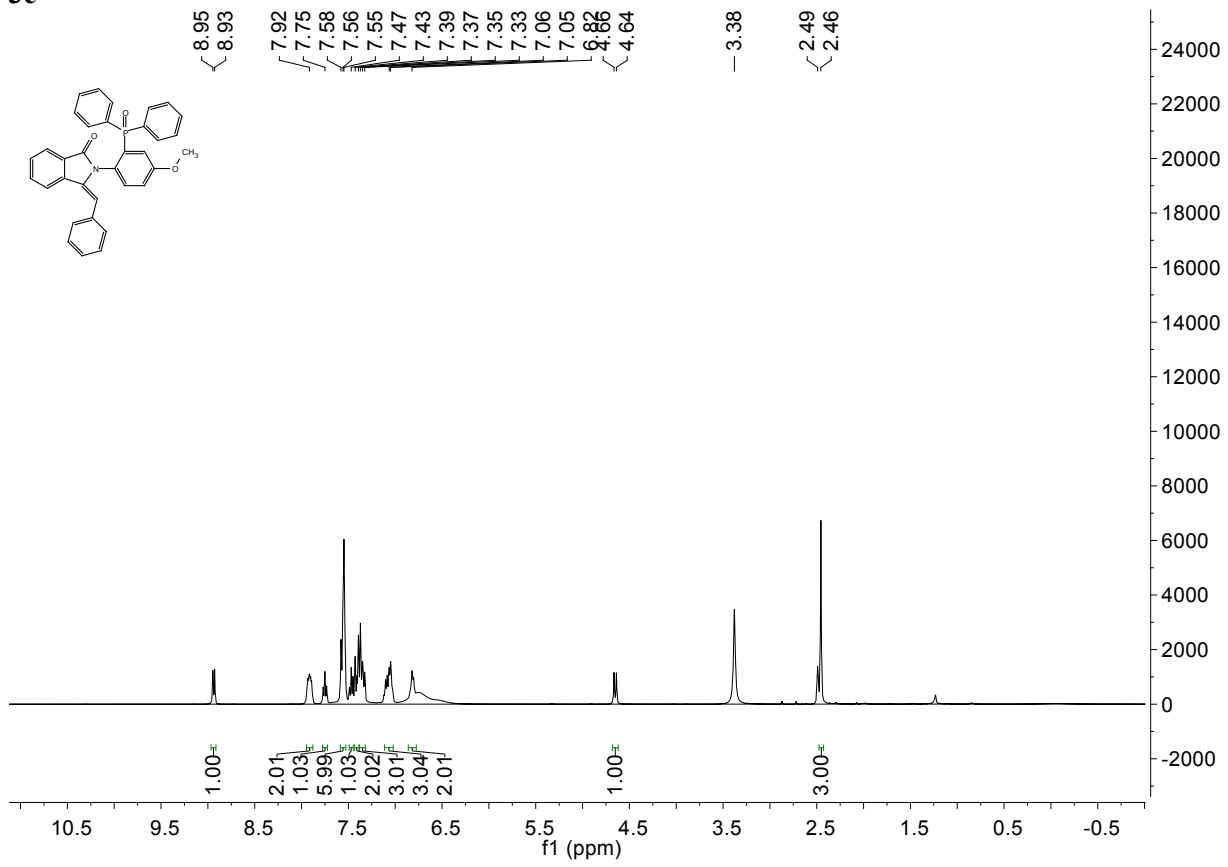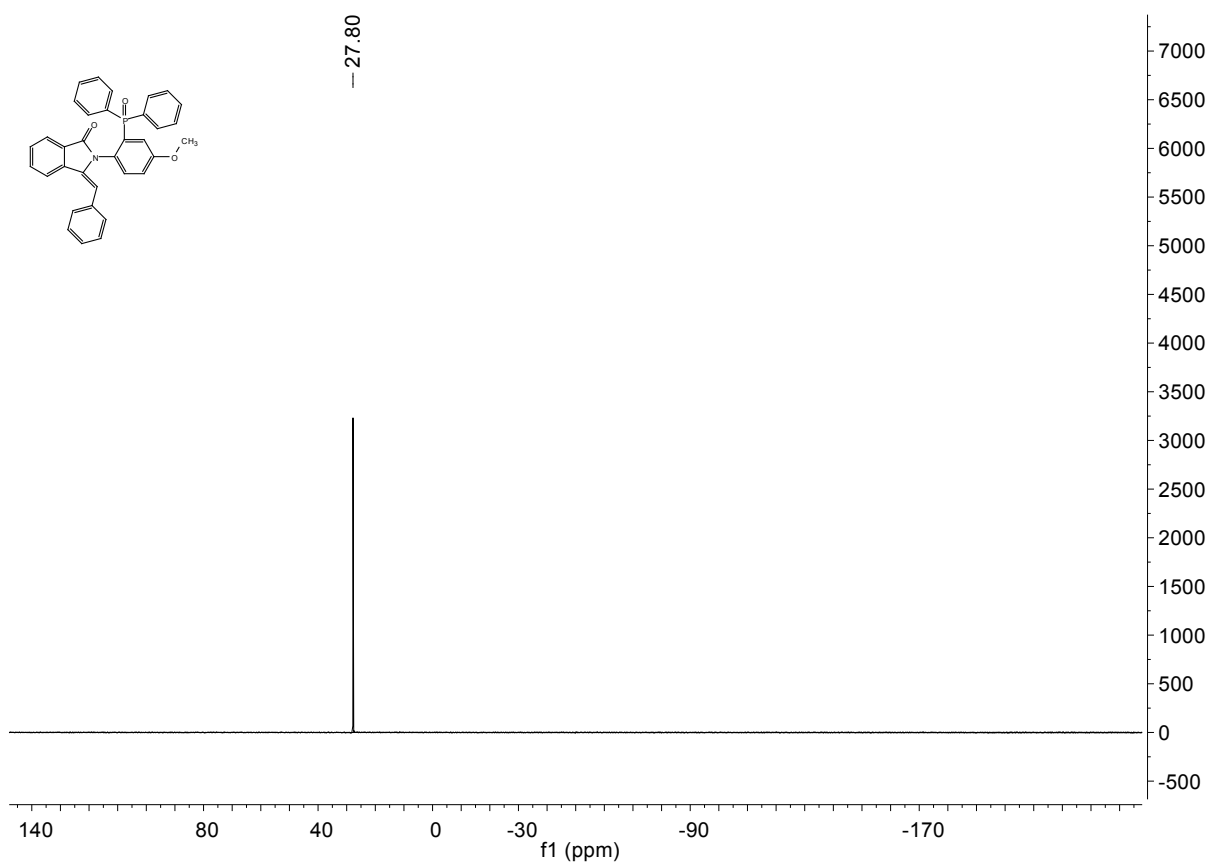

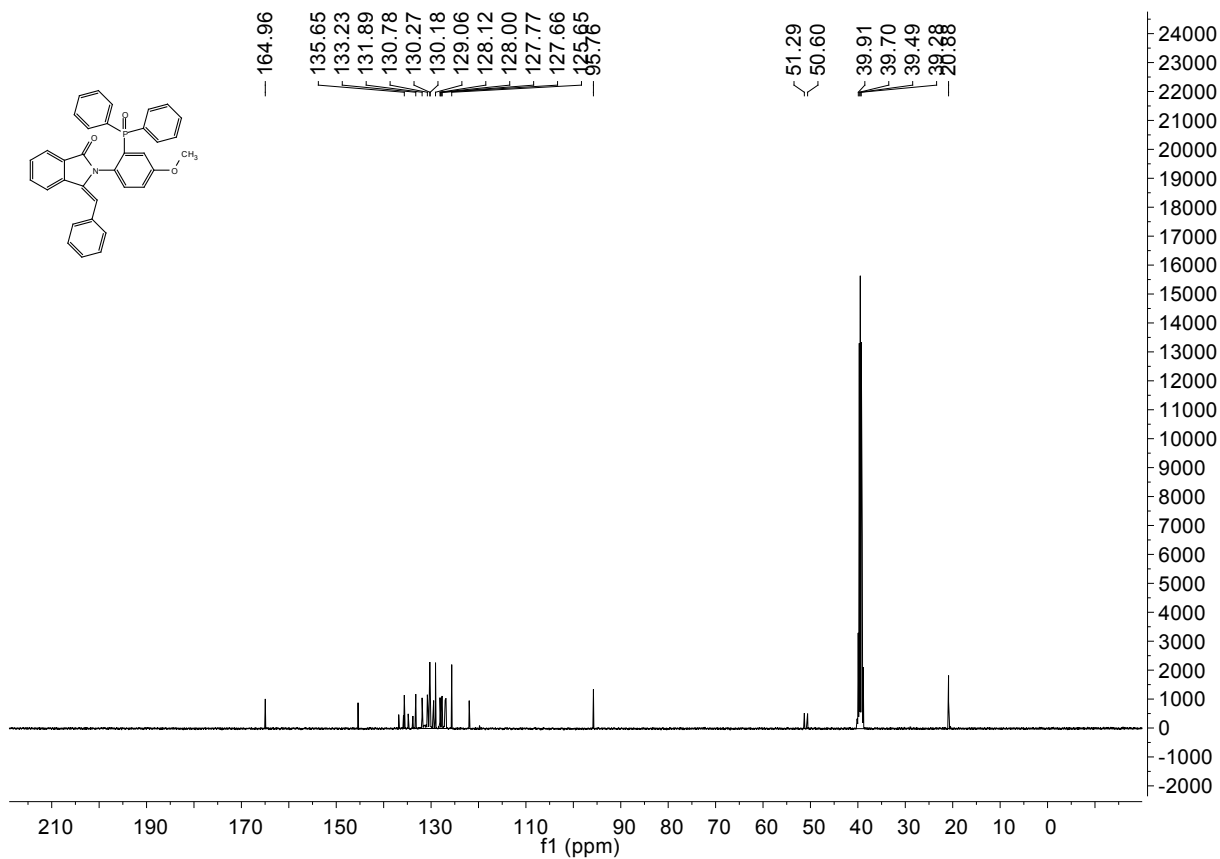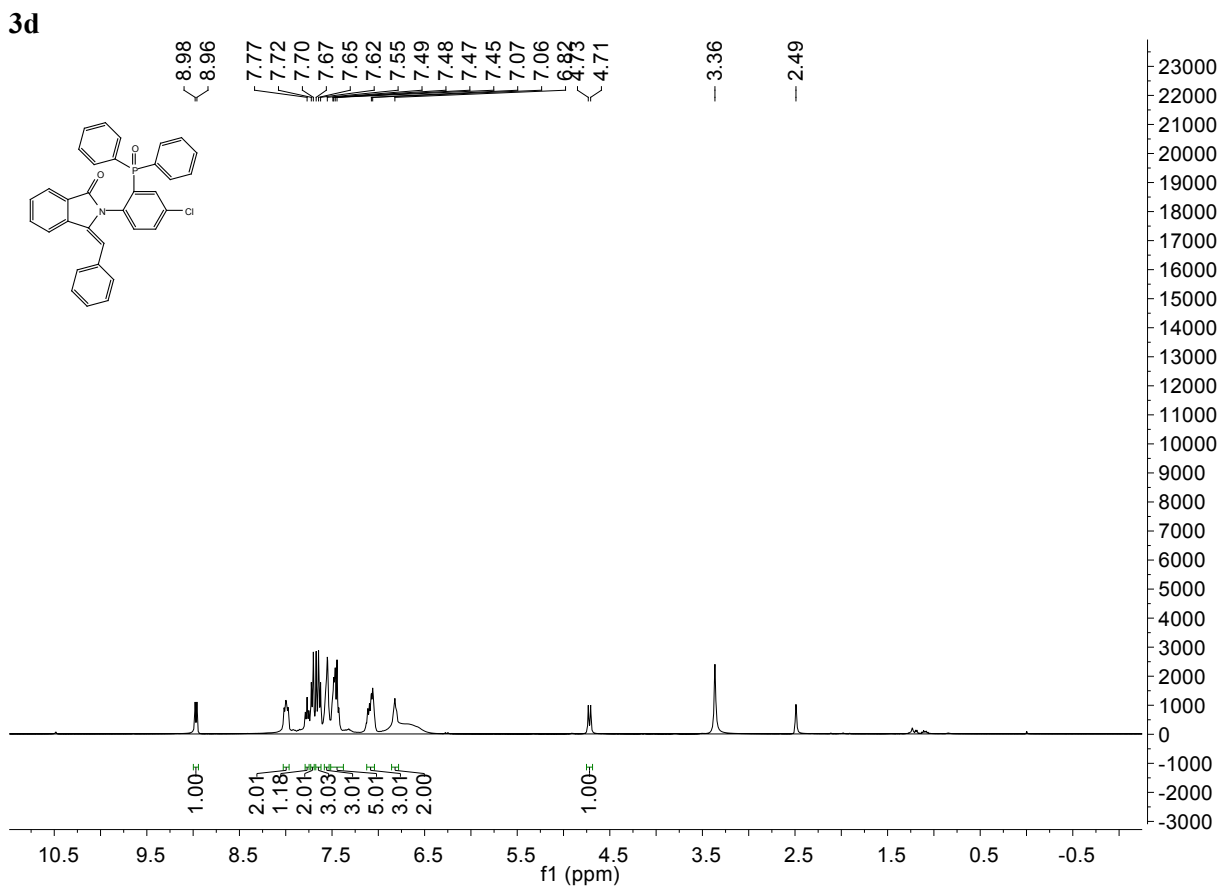

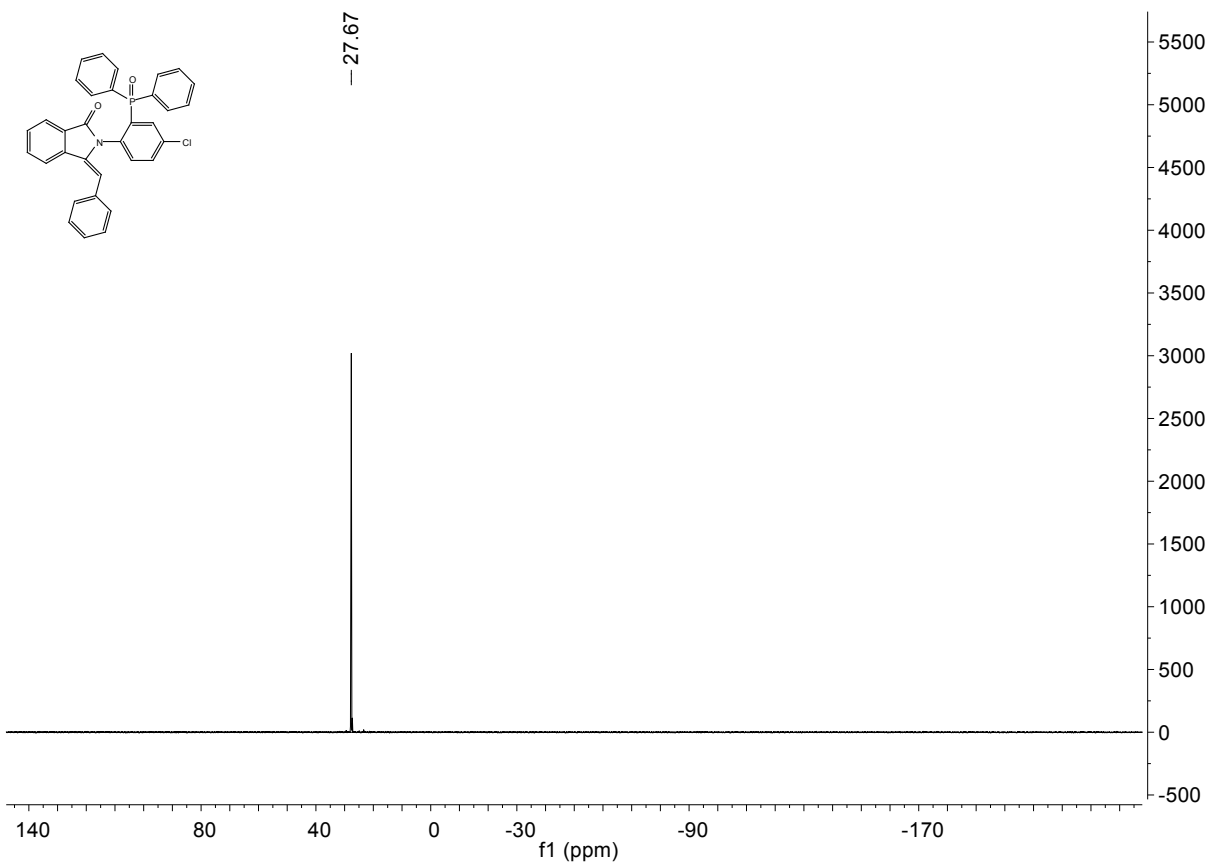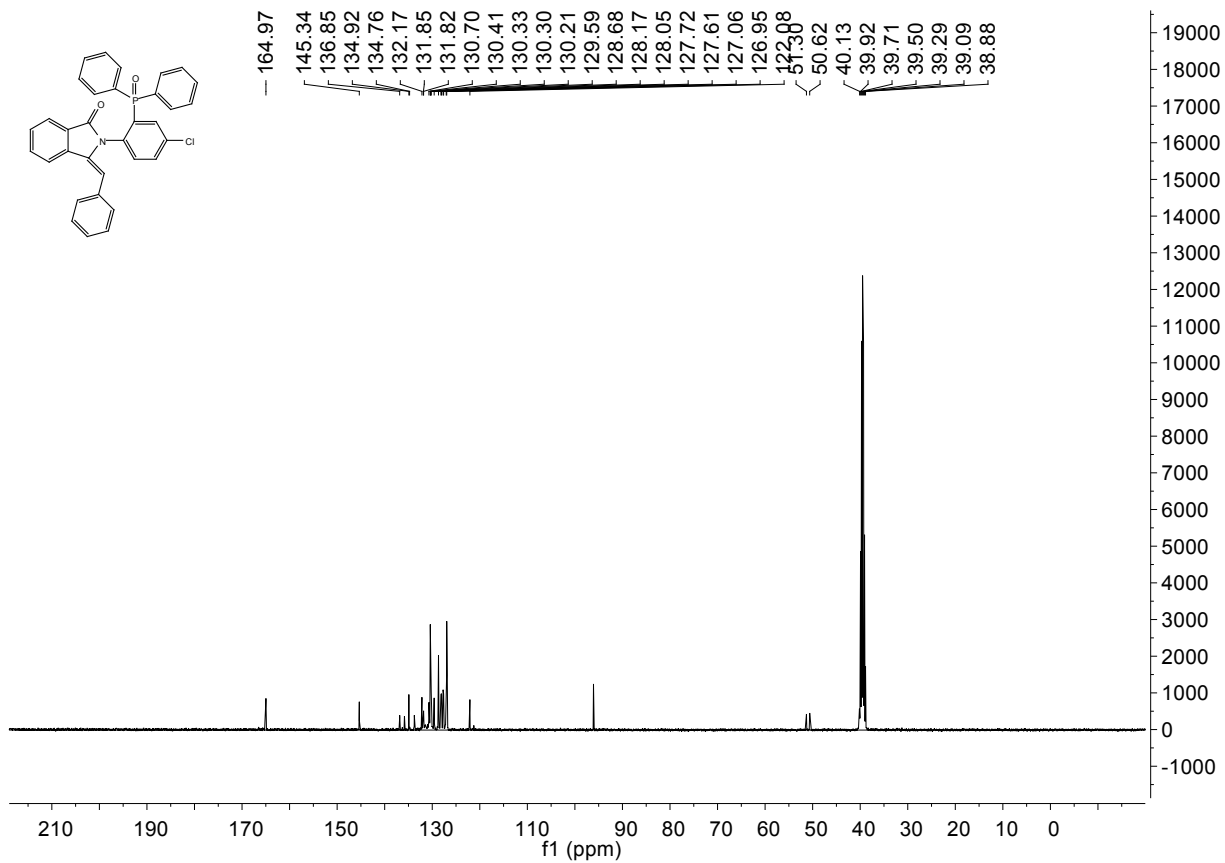

3e

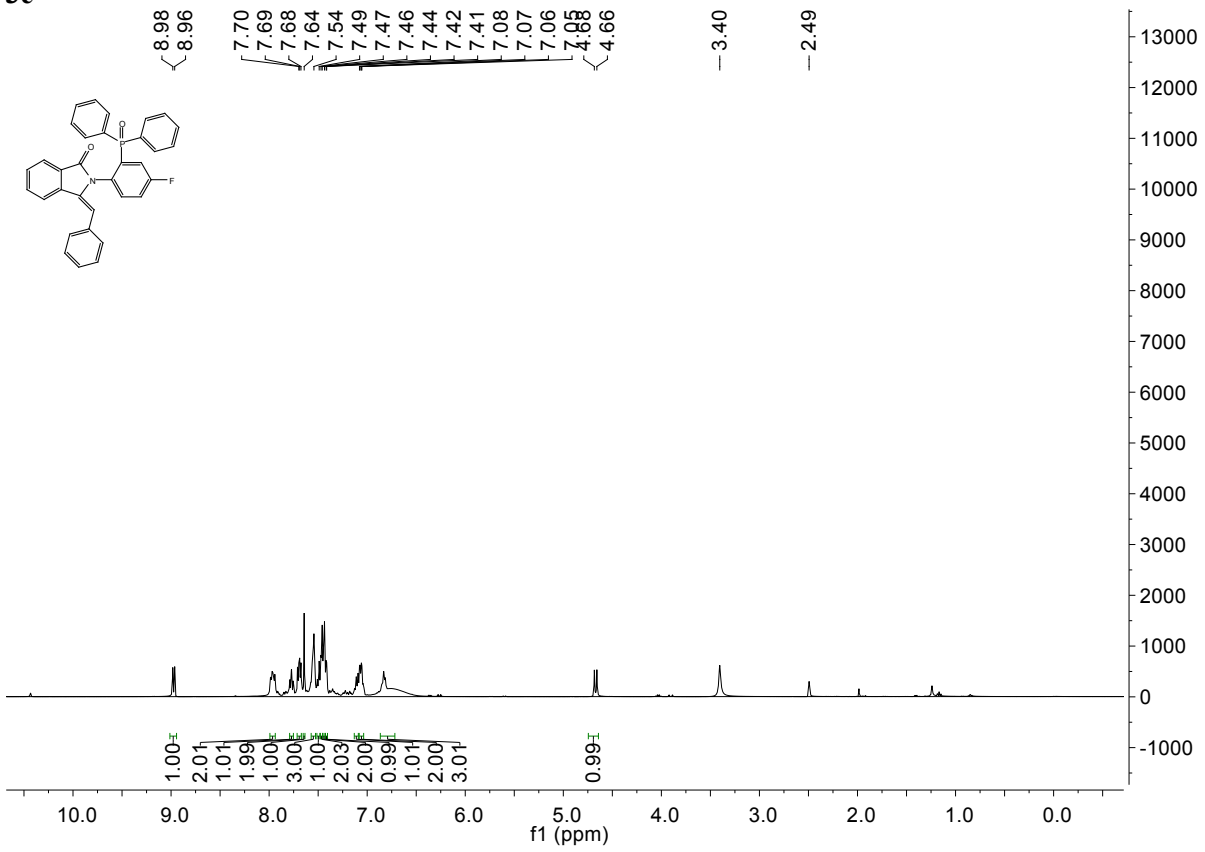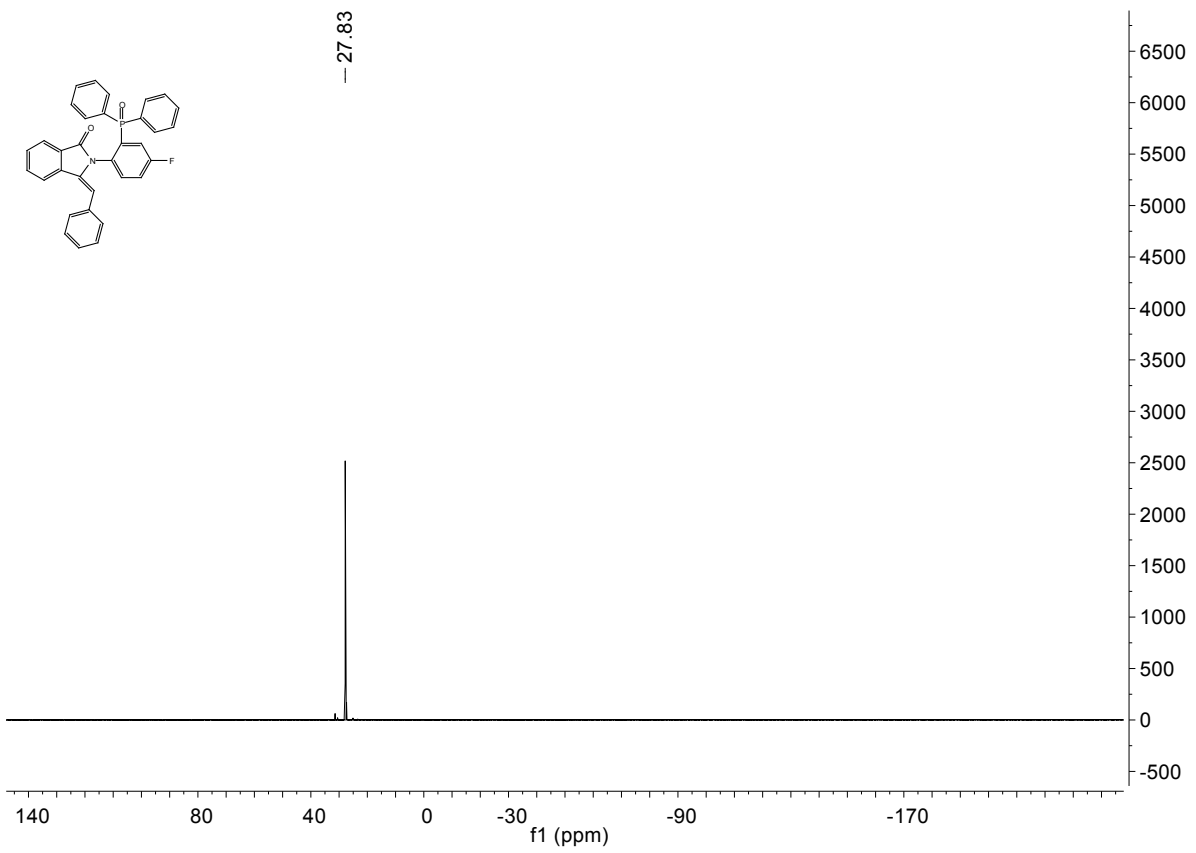

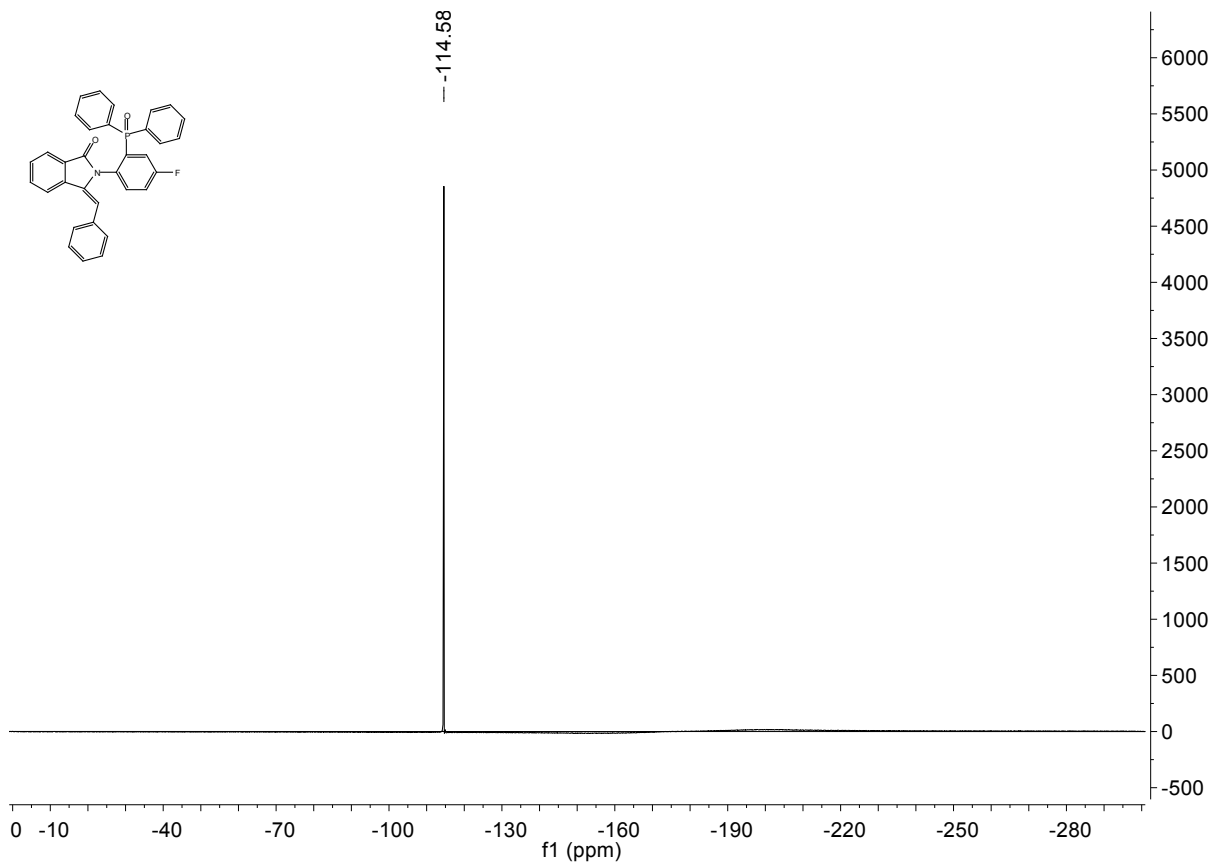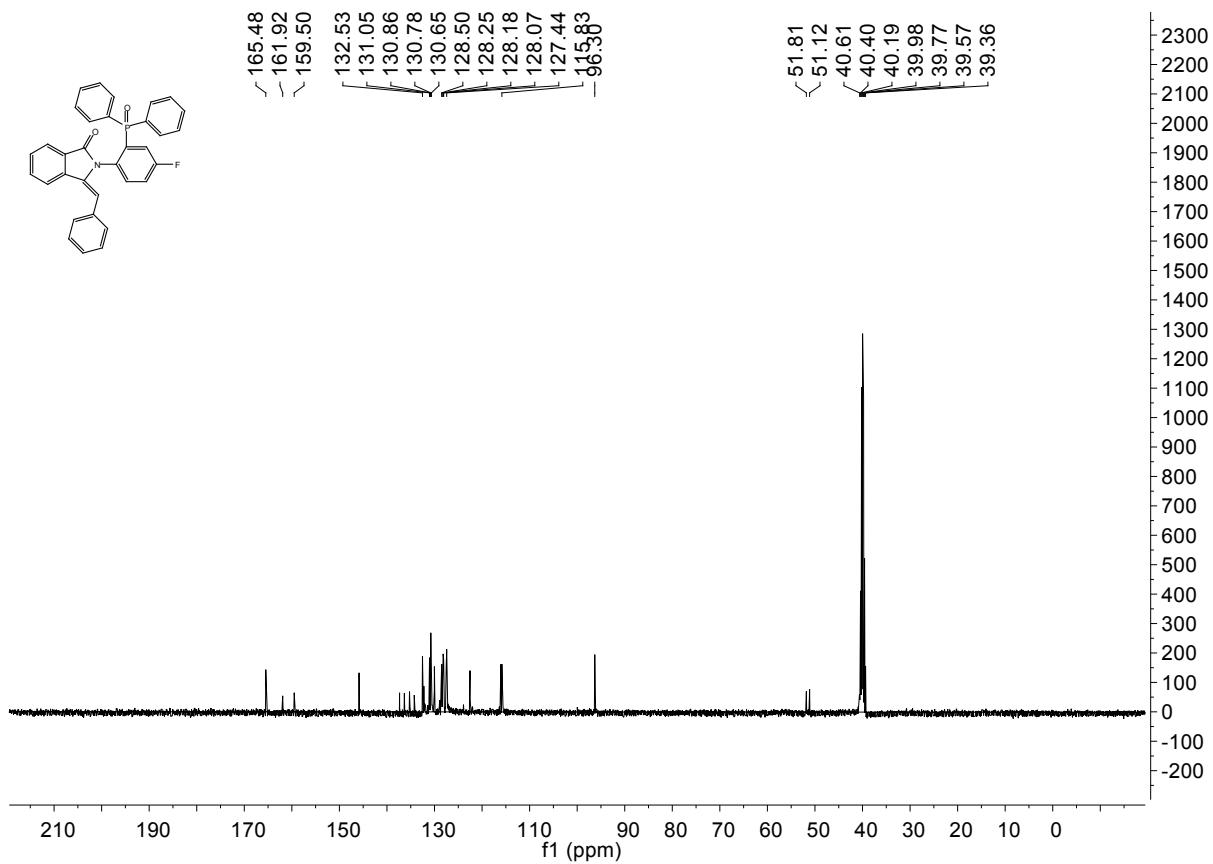



3f

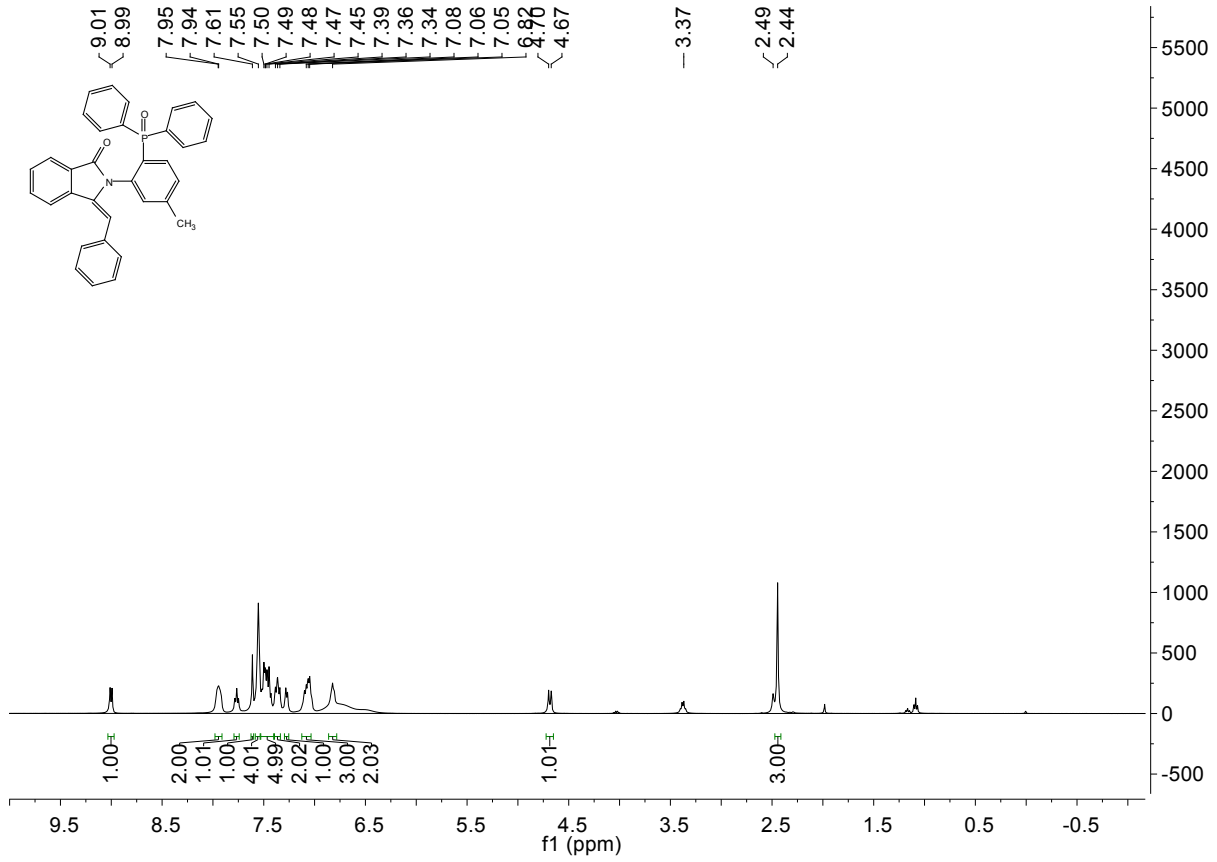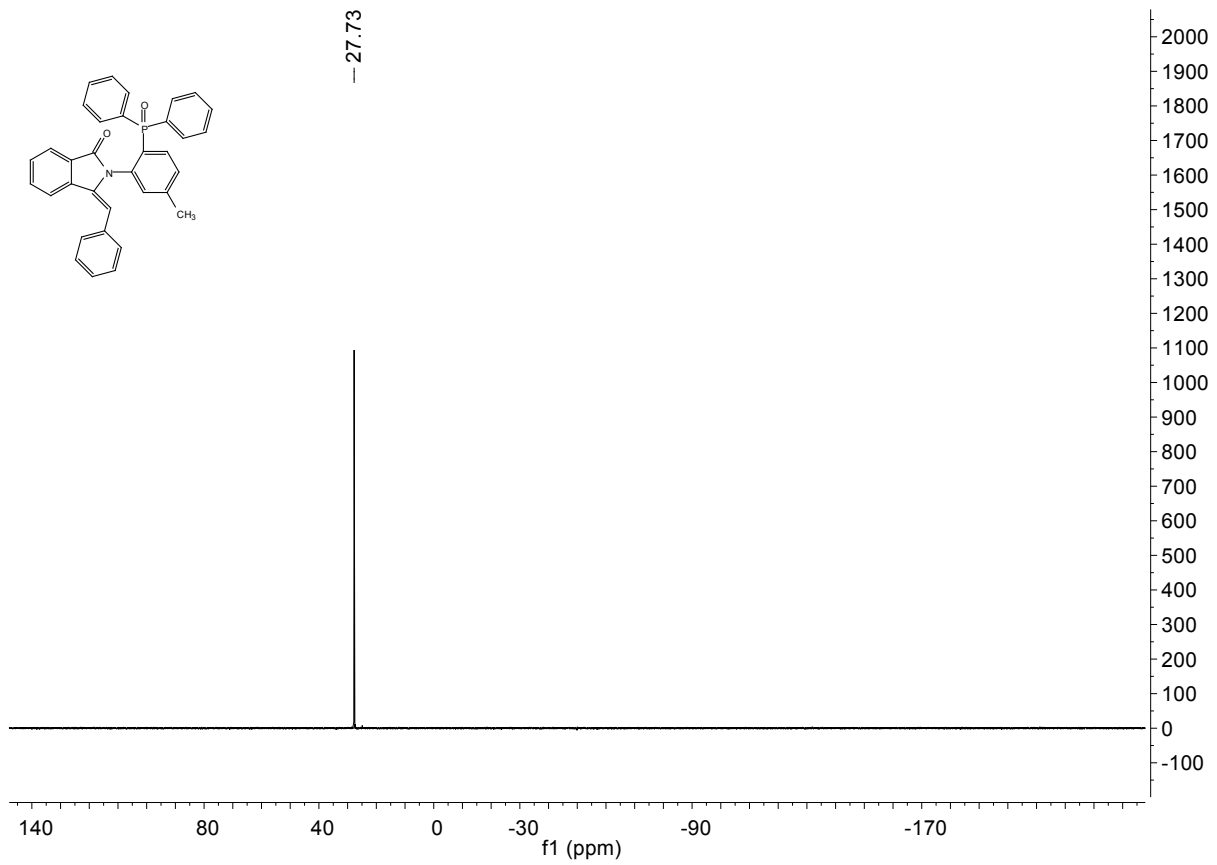

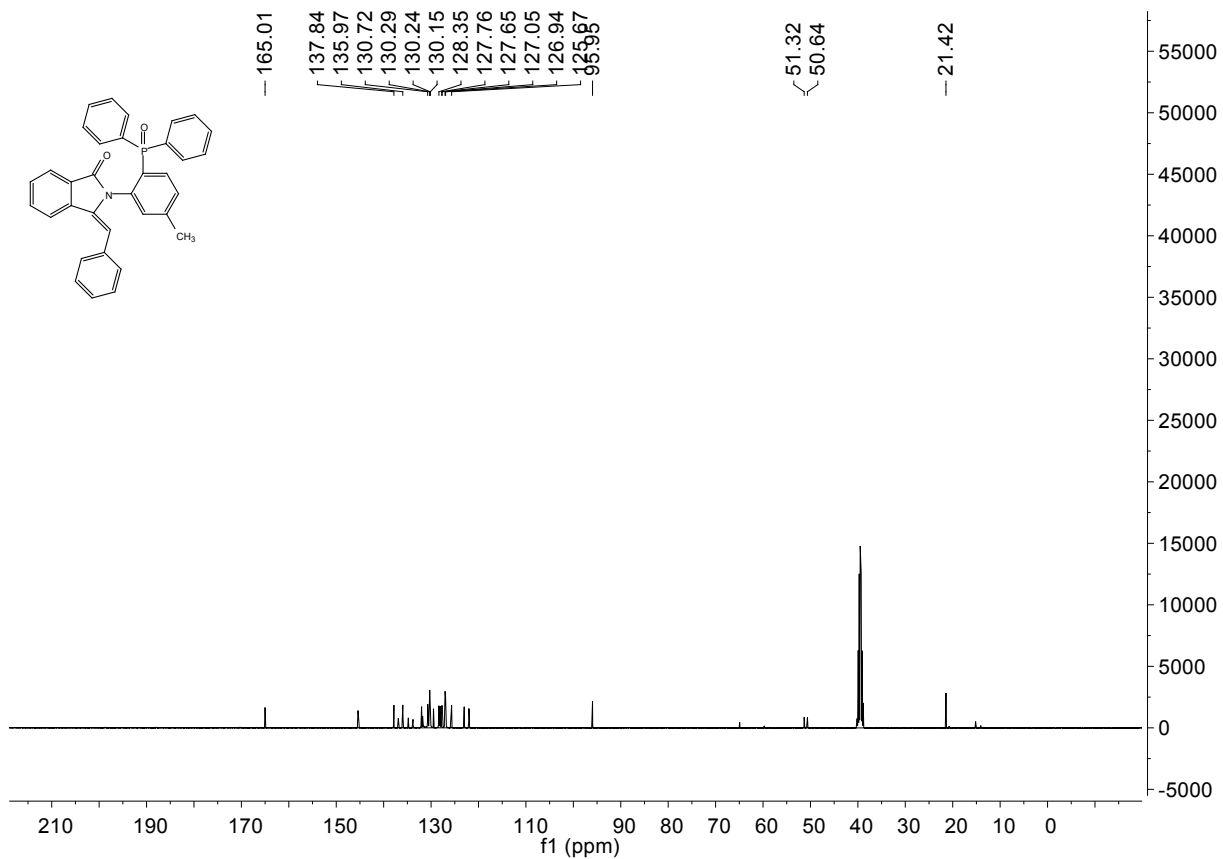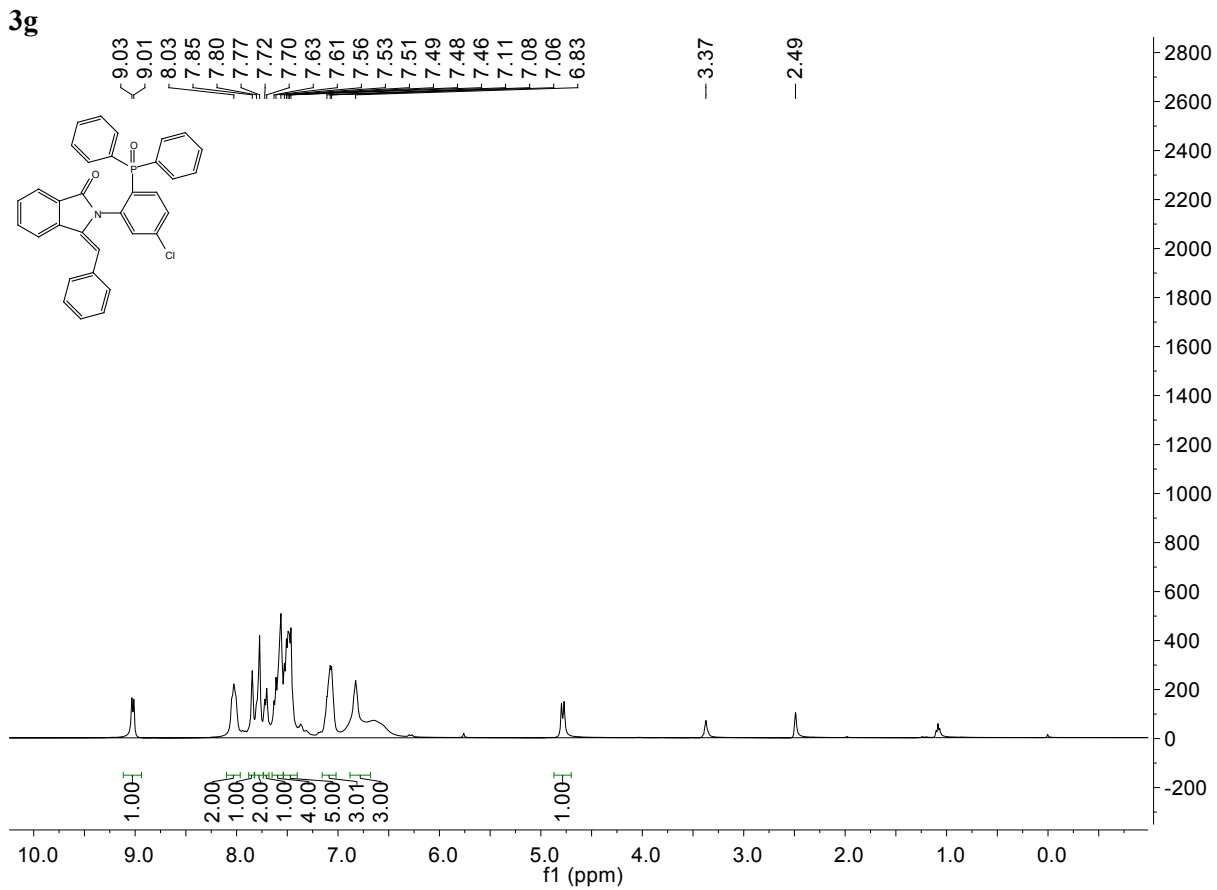

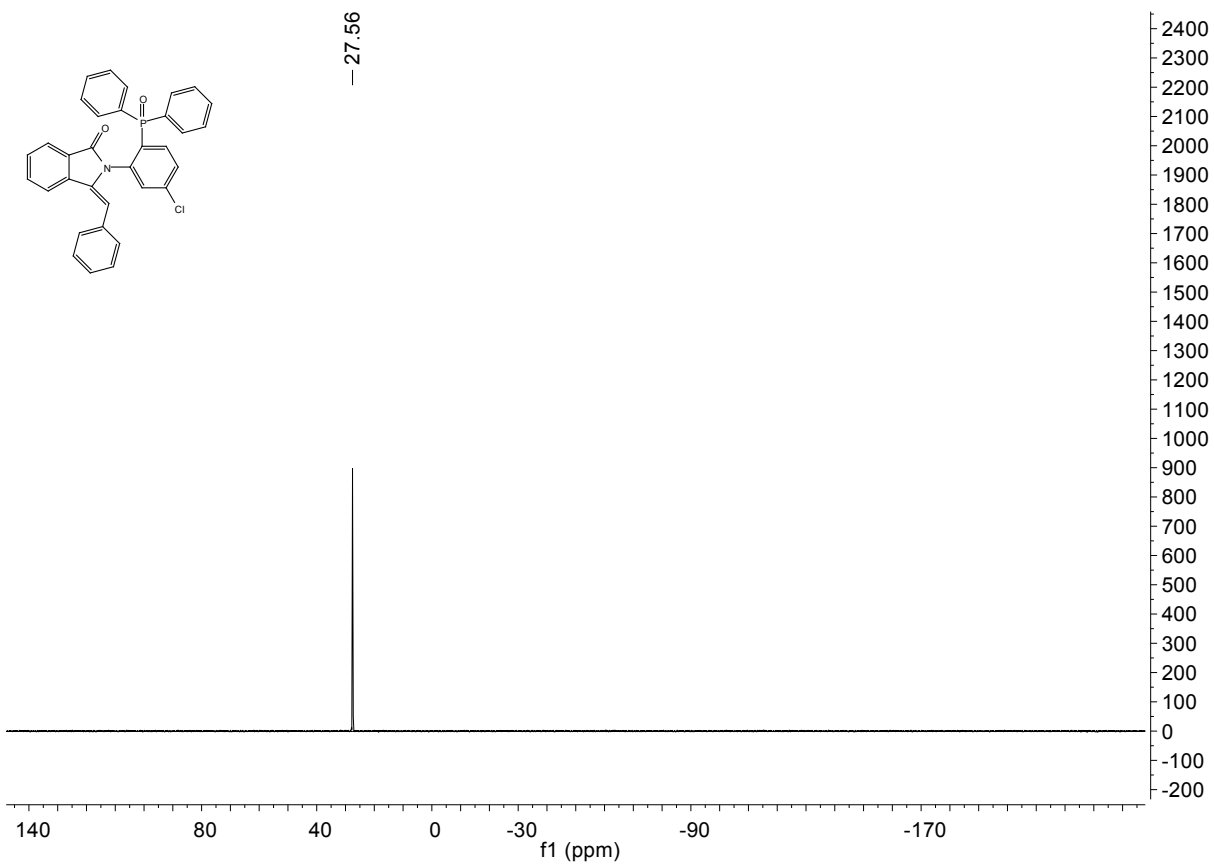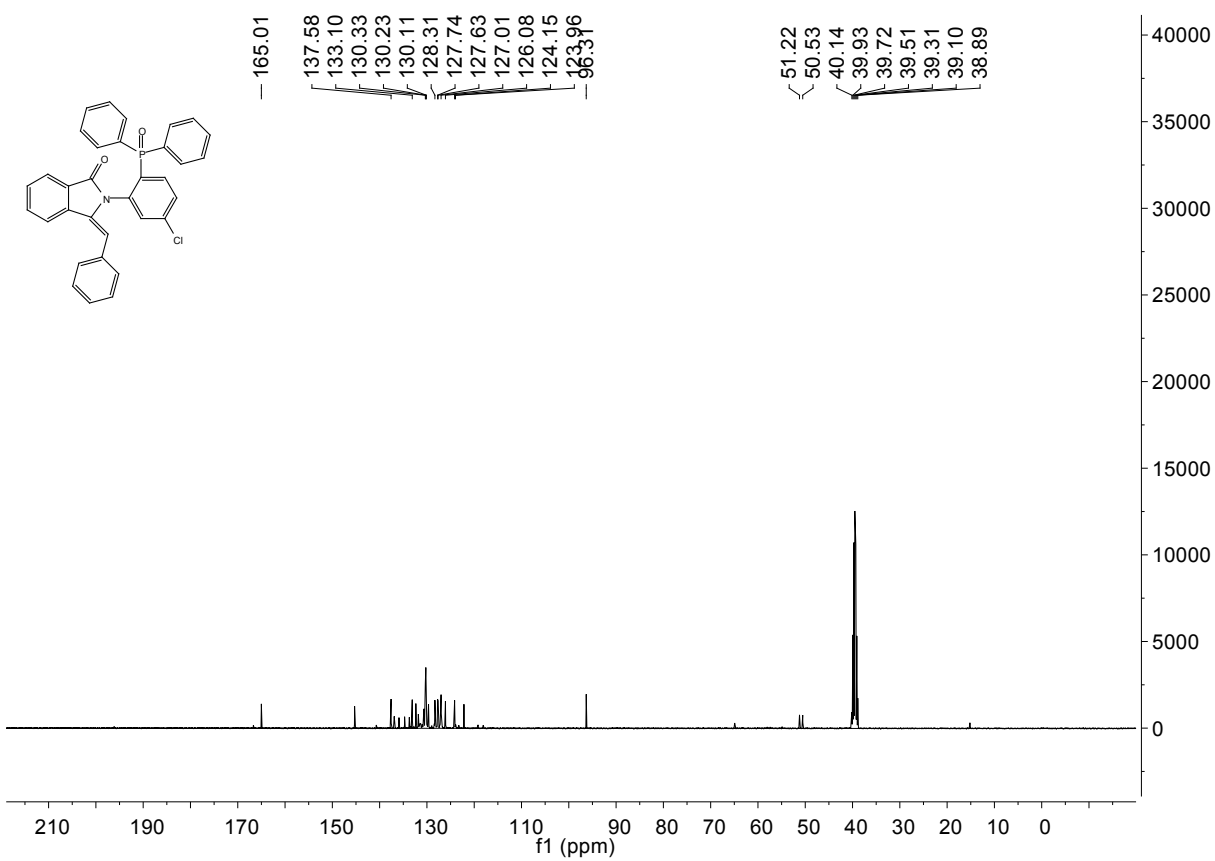

3h

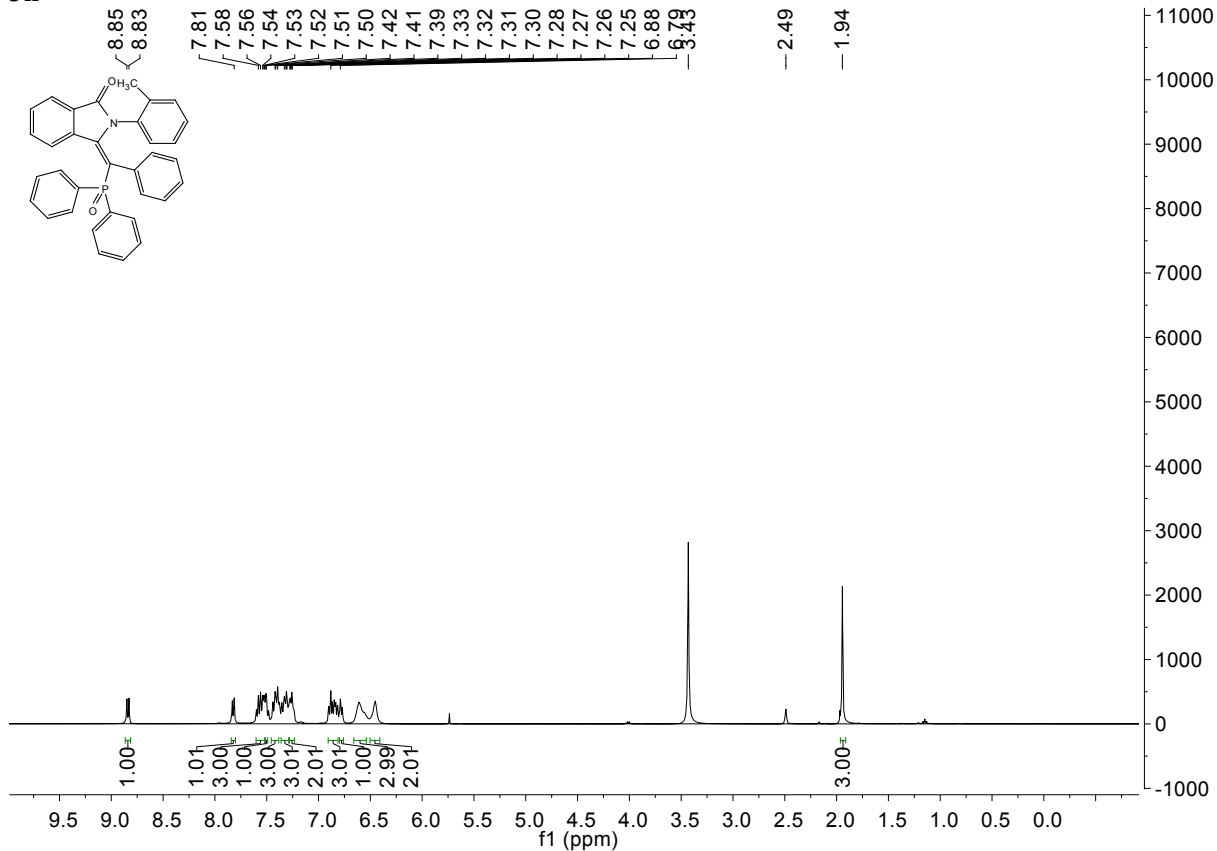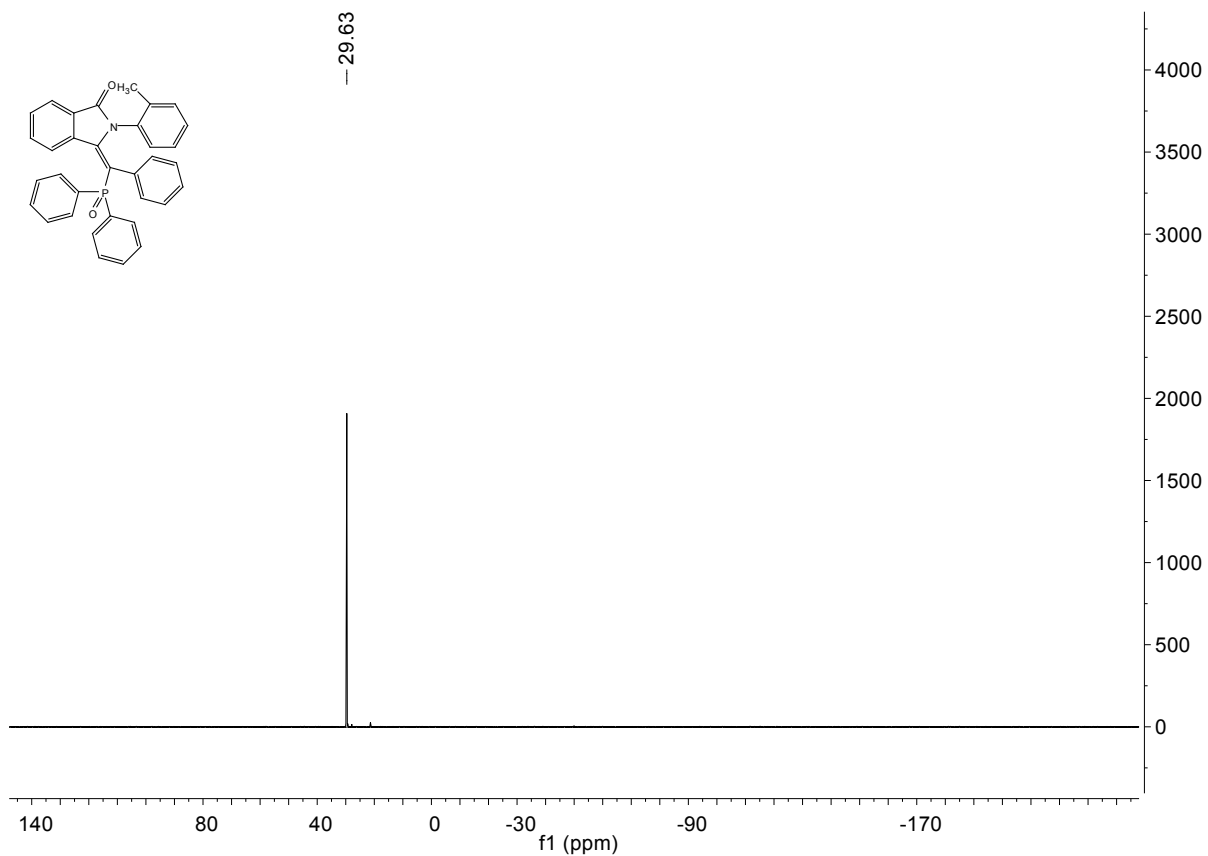

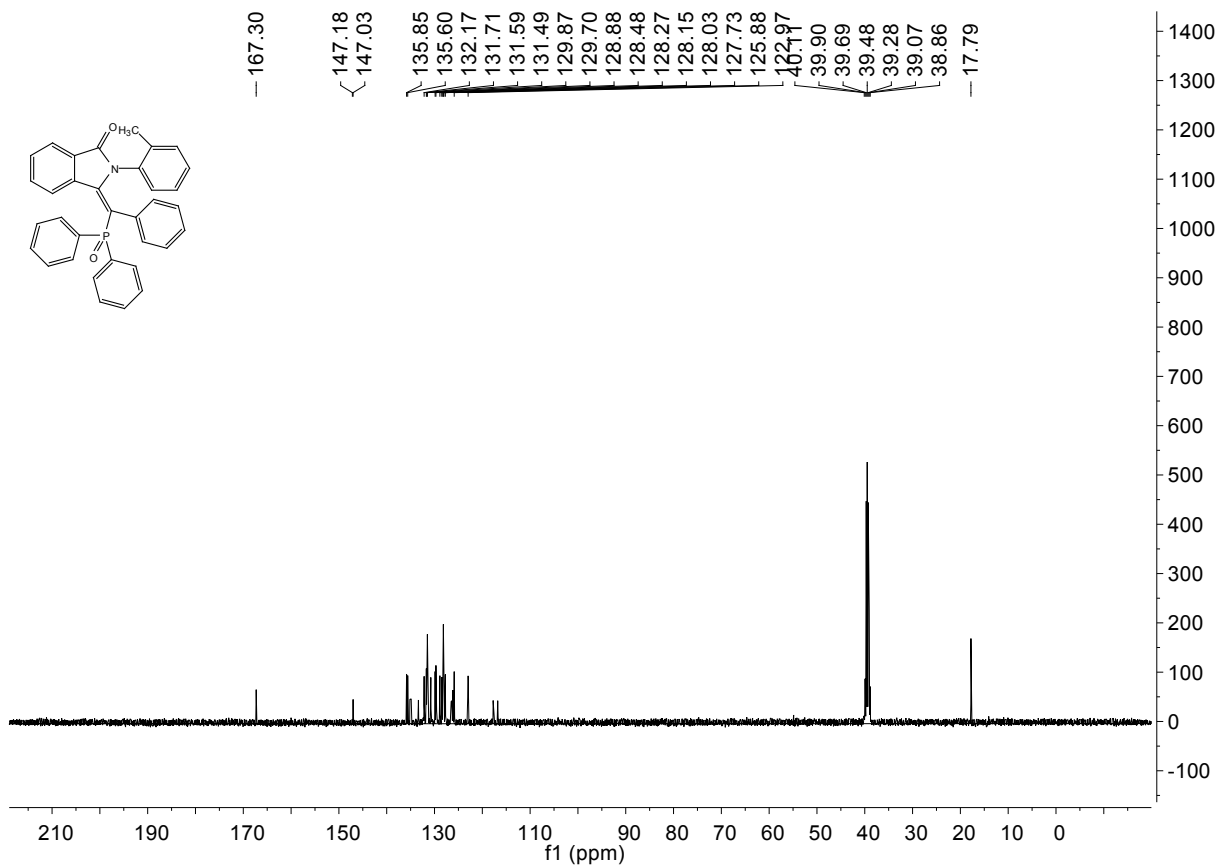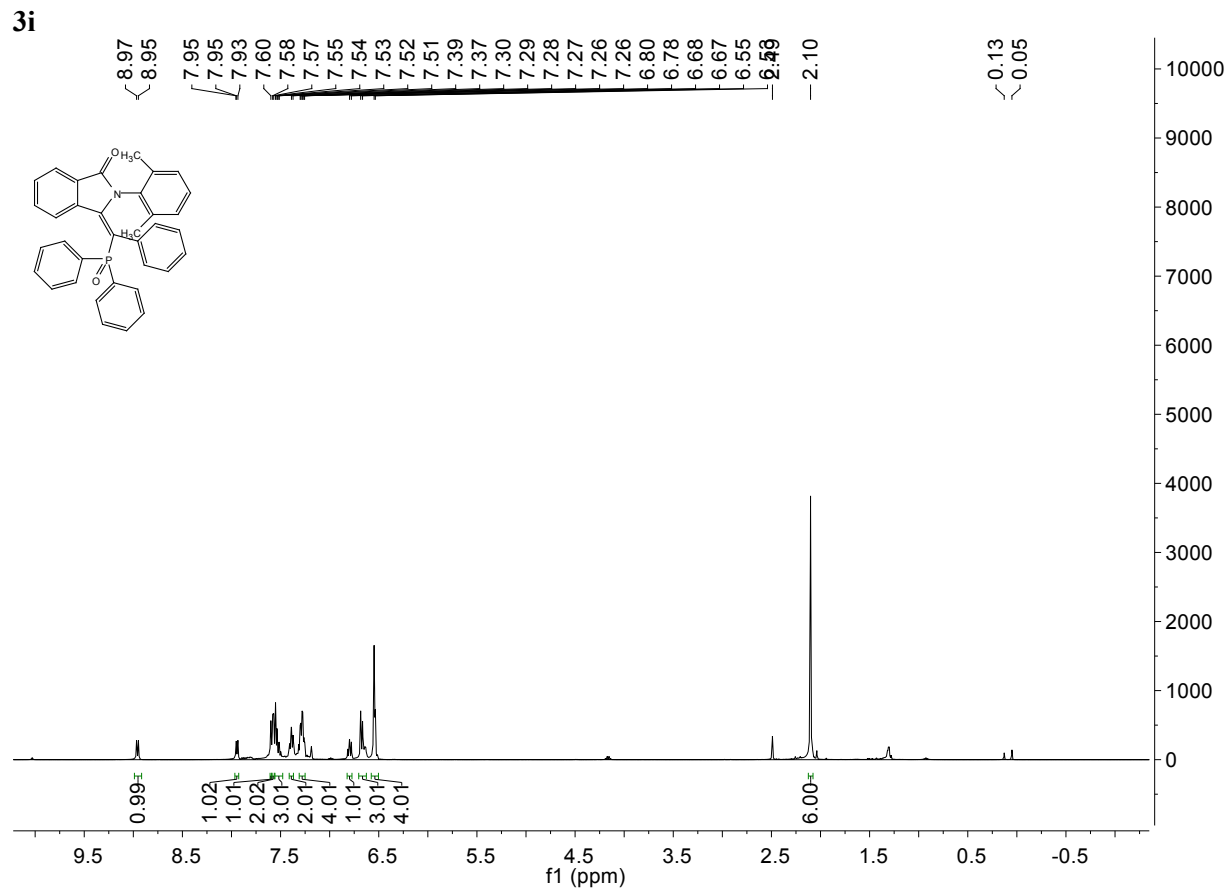

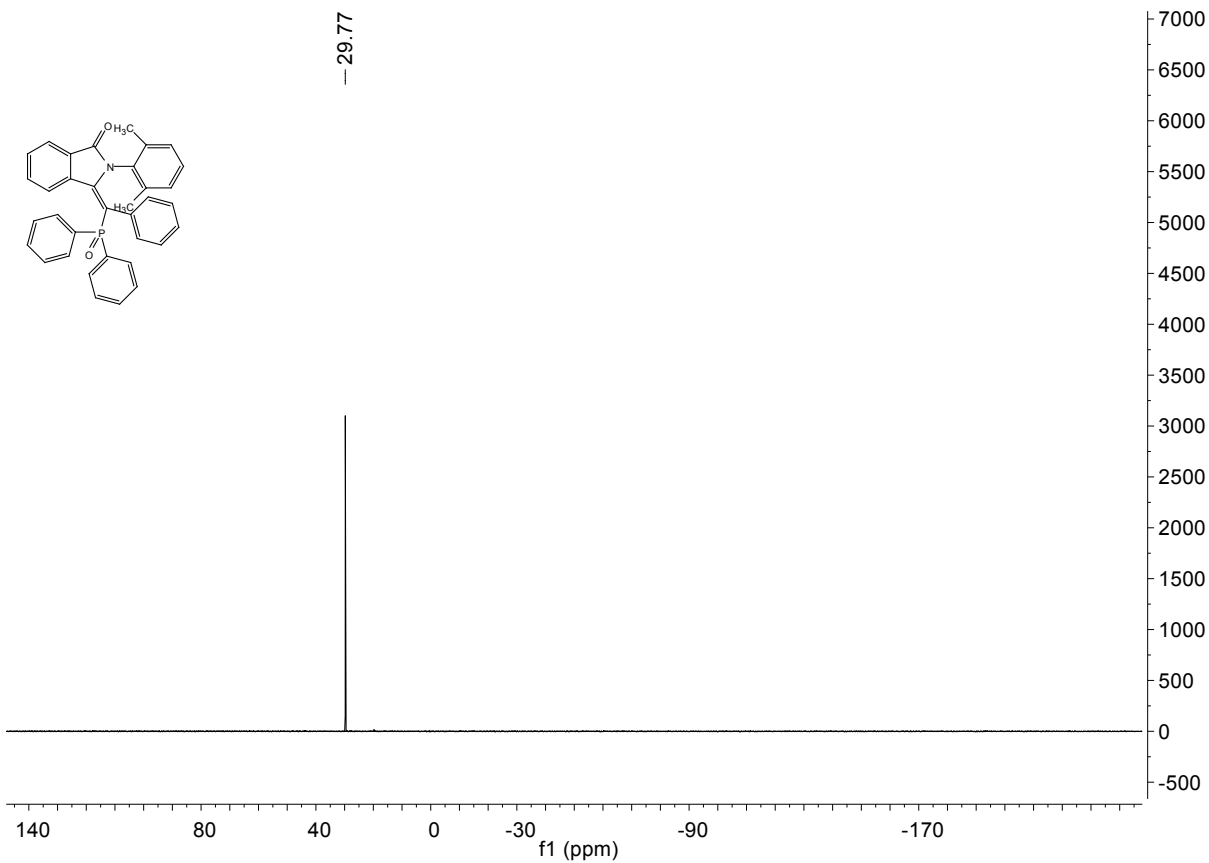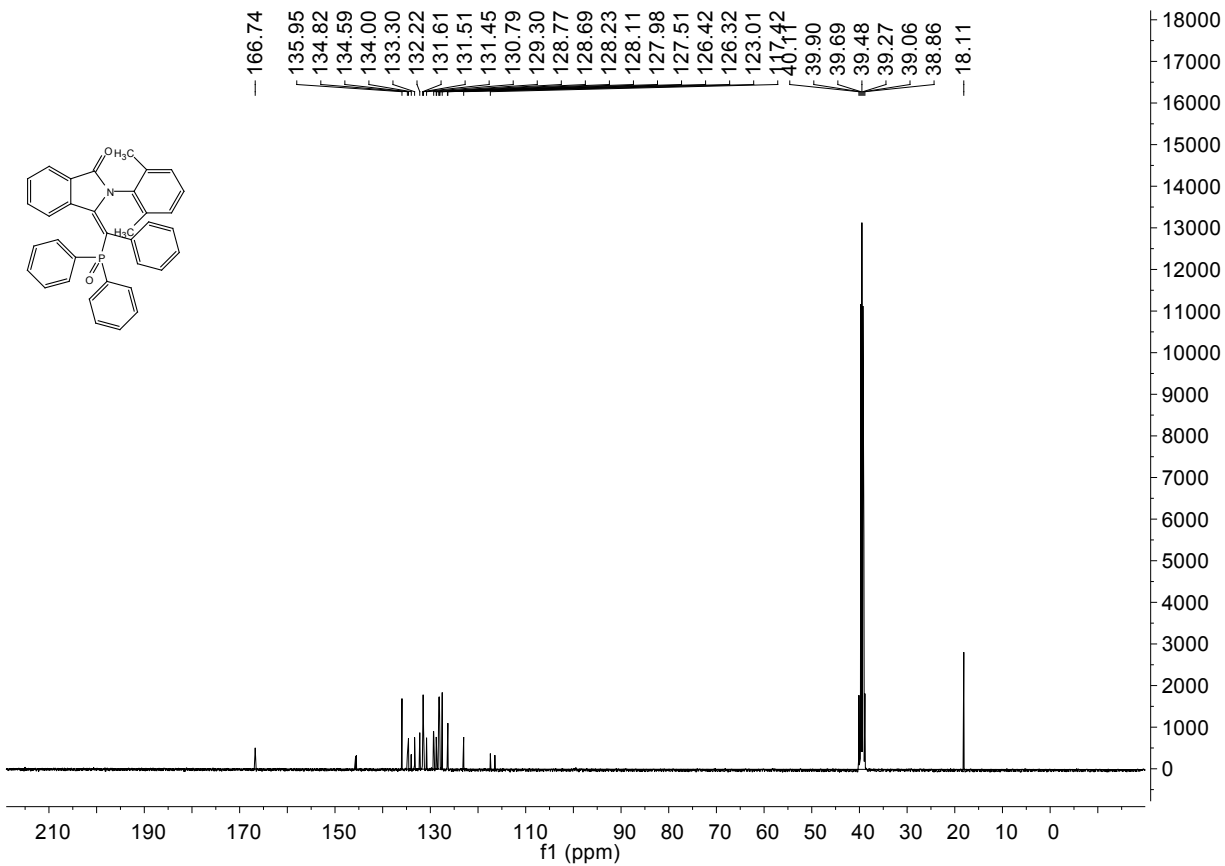

3j

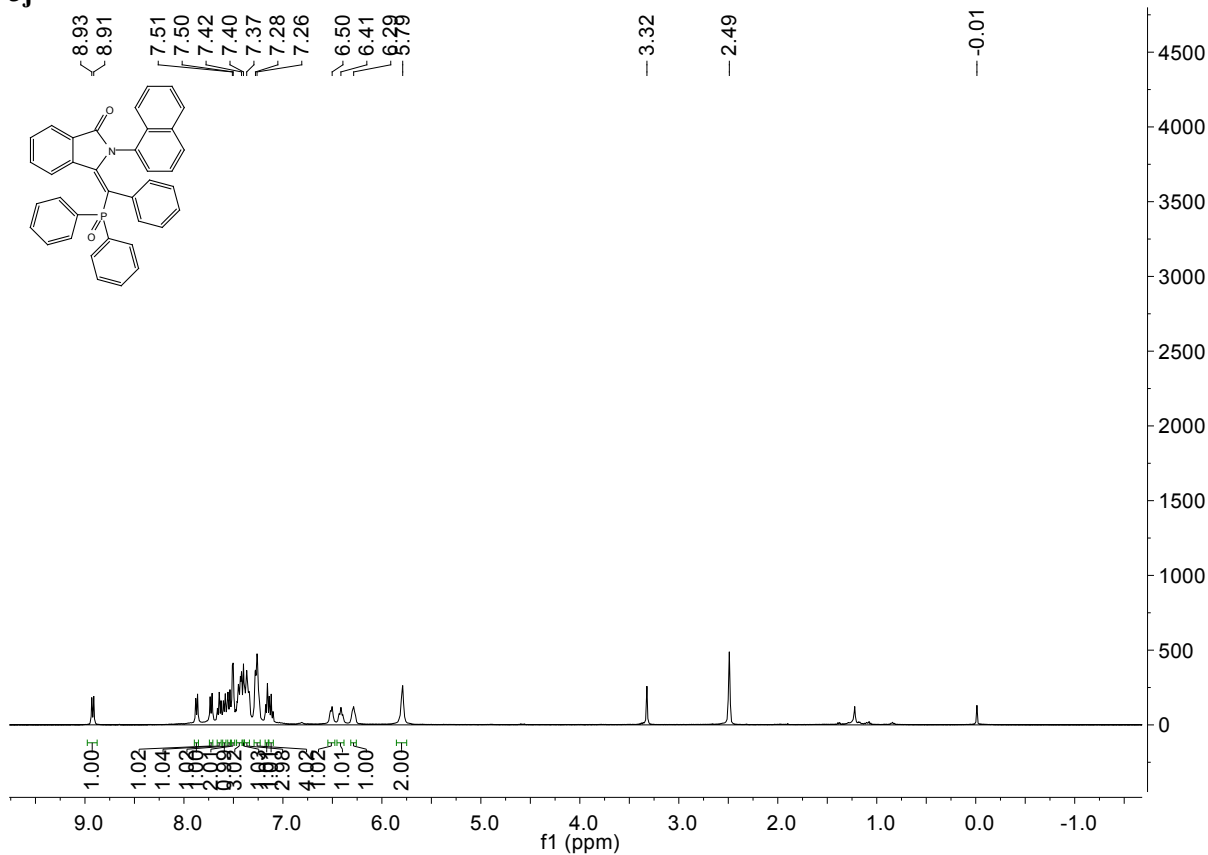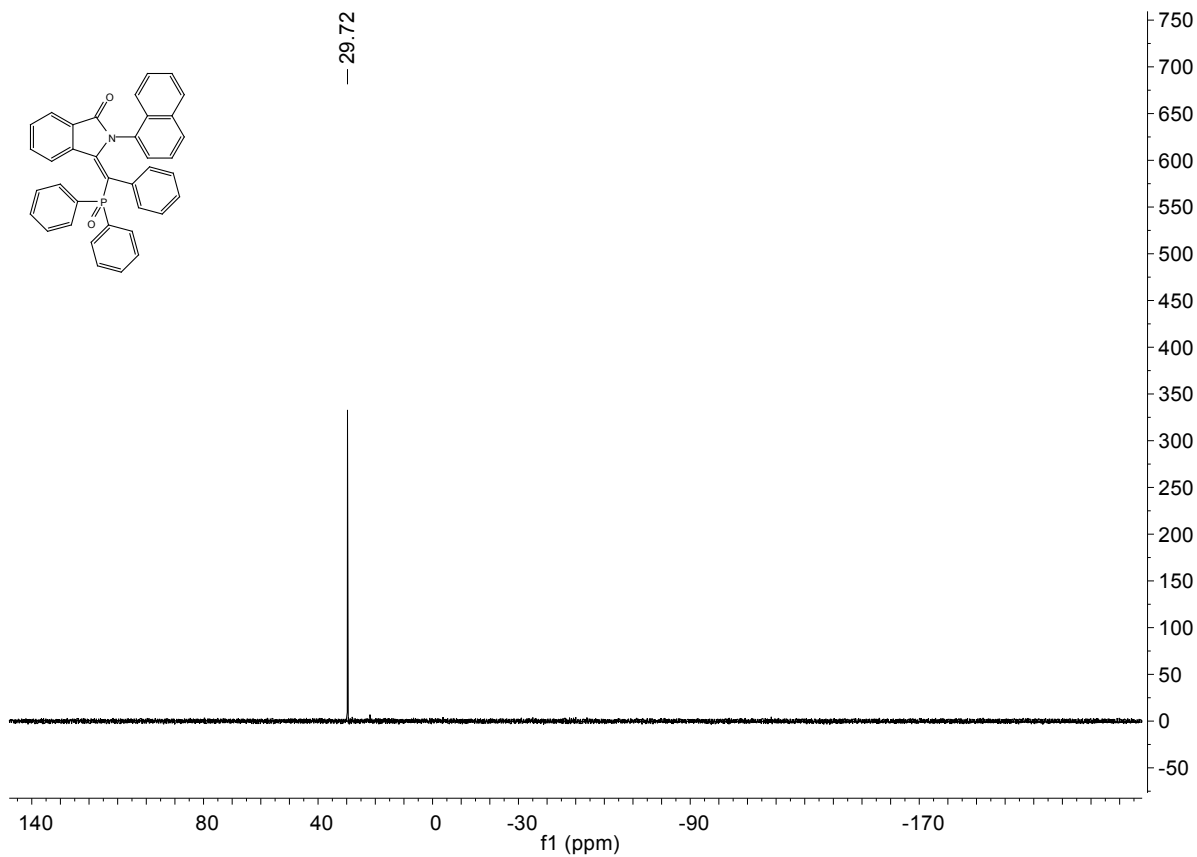

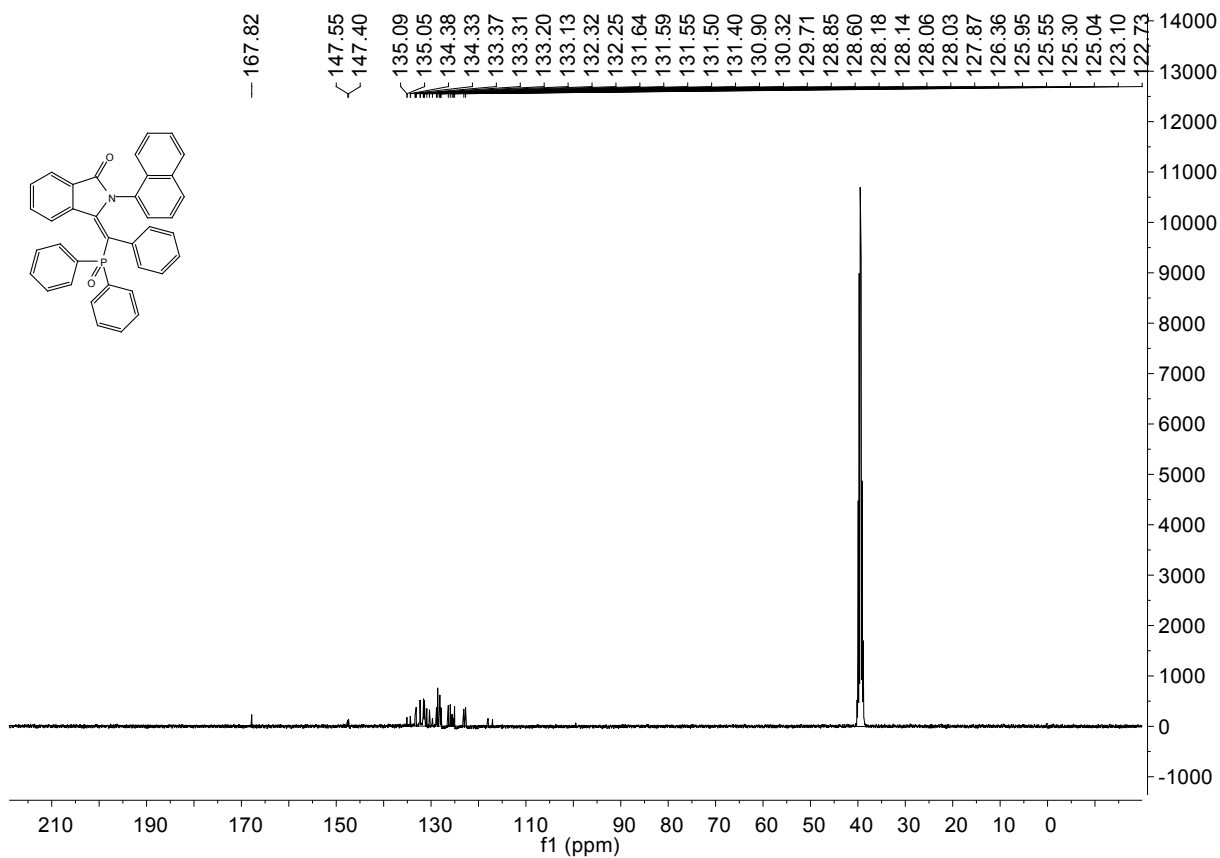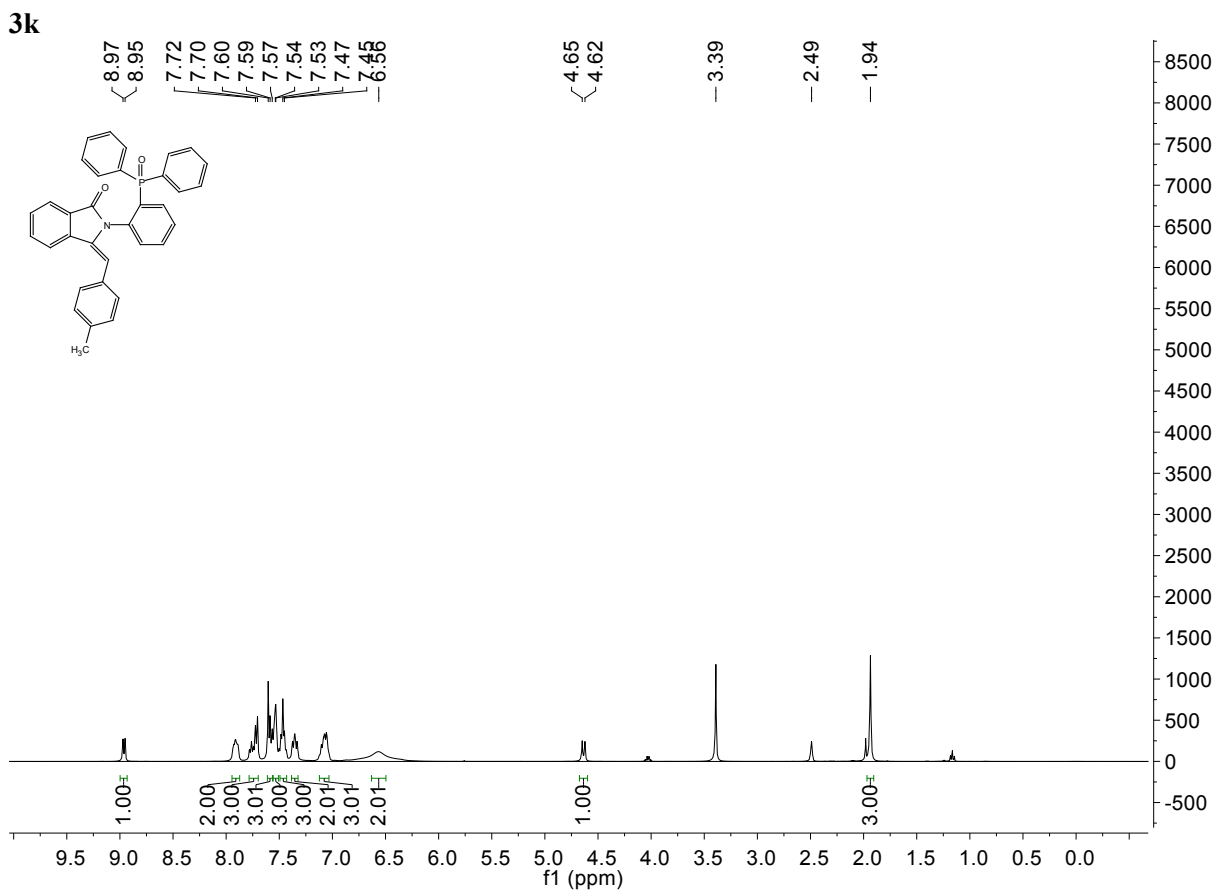



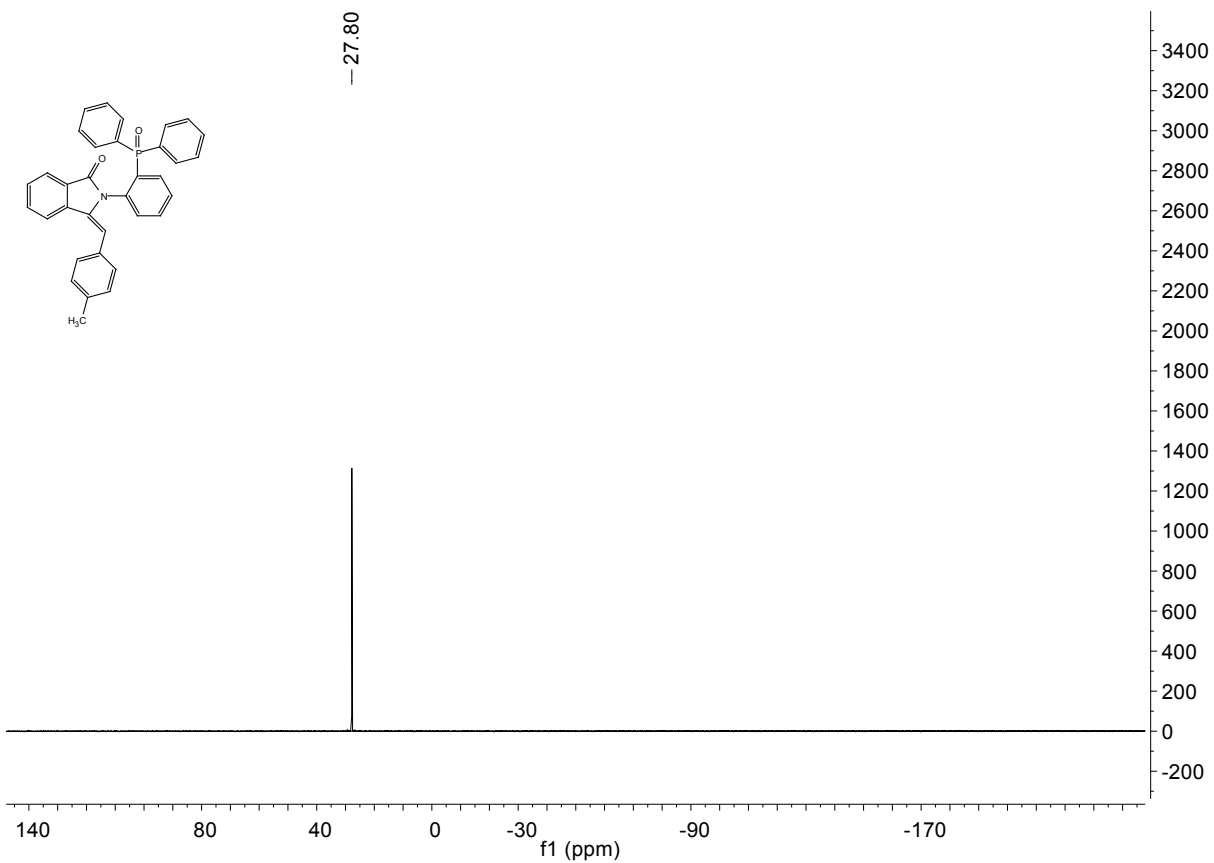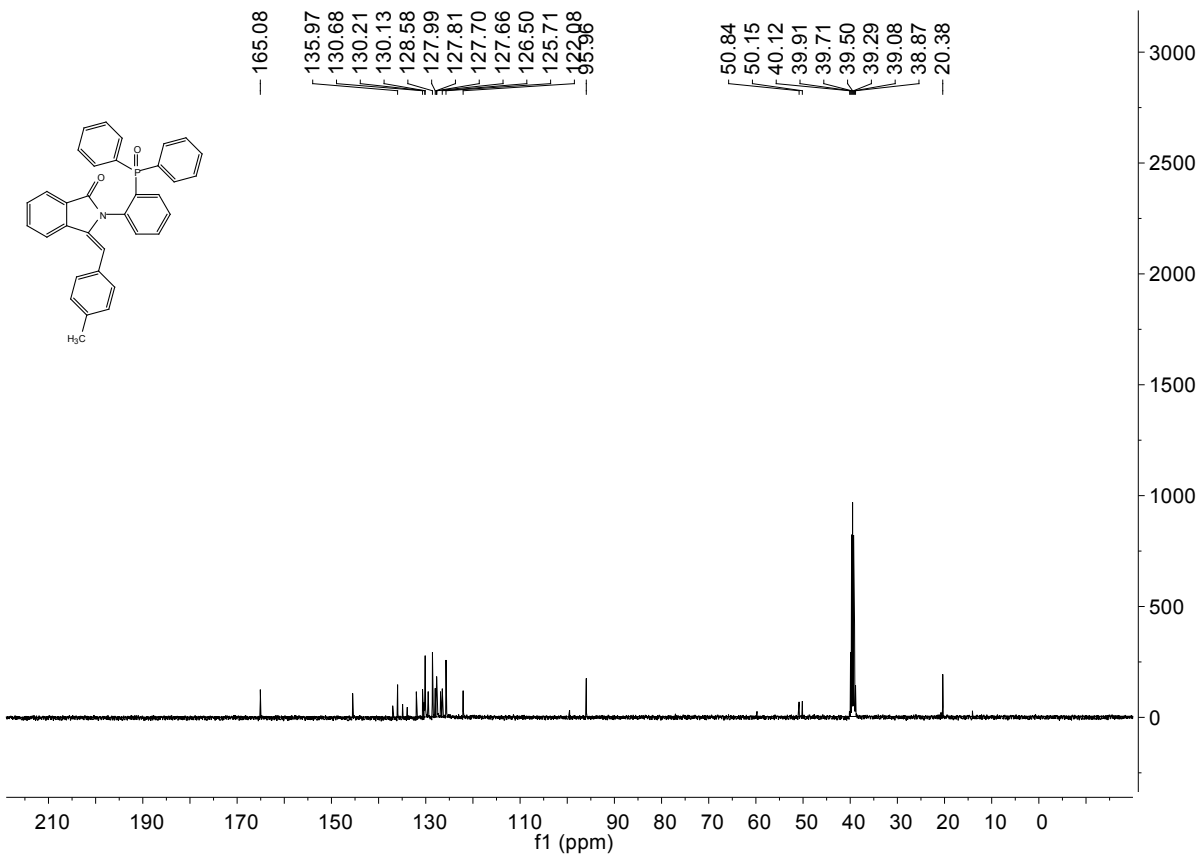

31

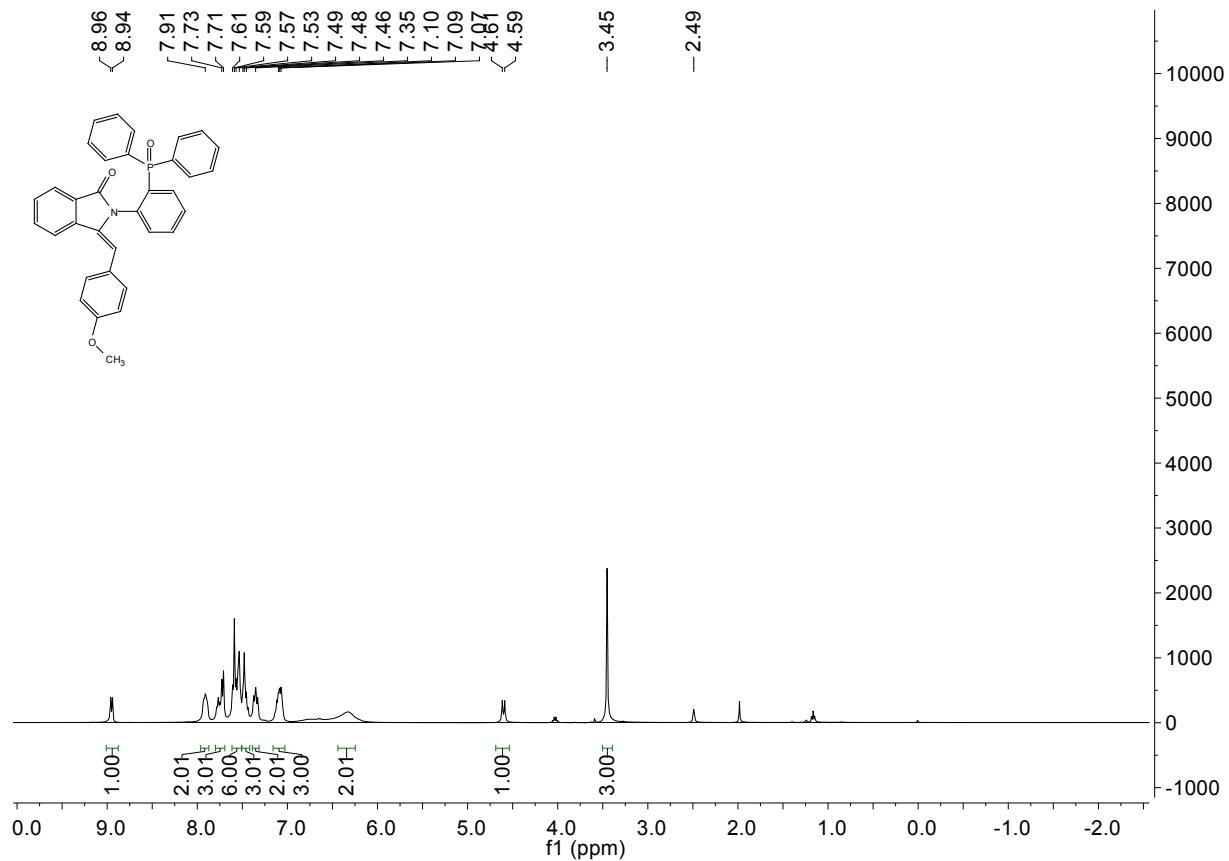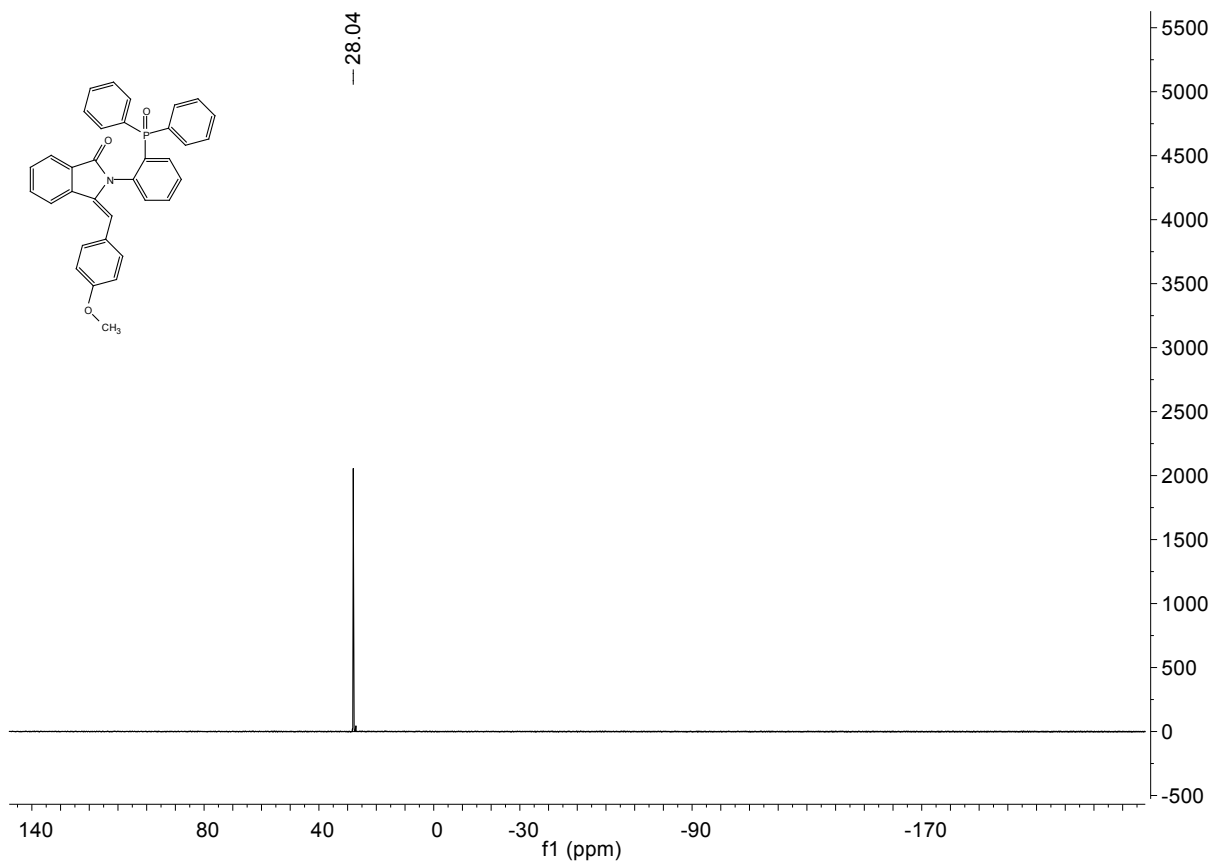

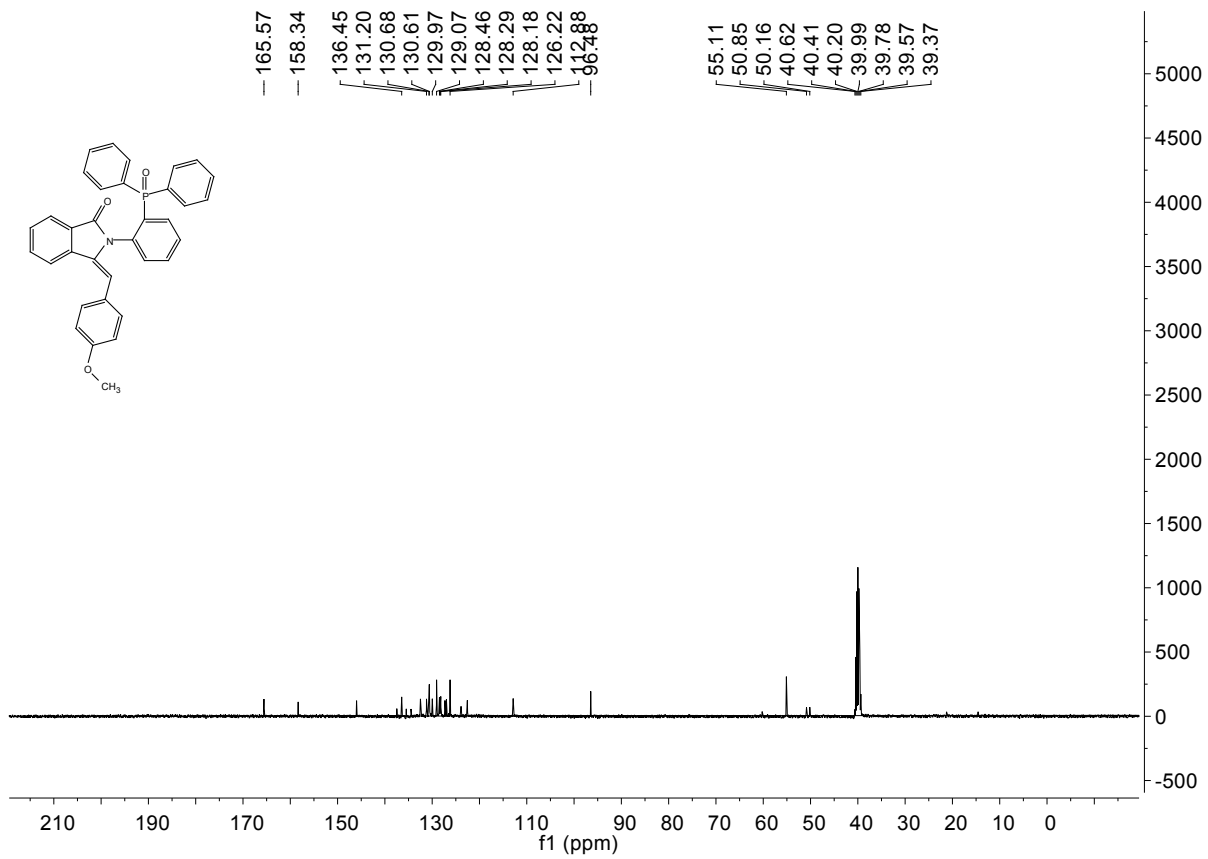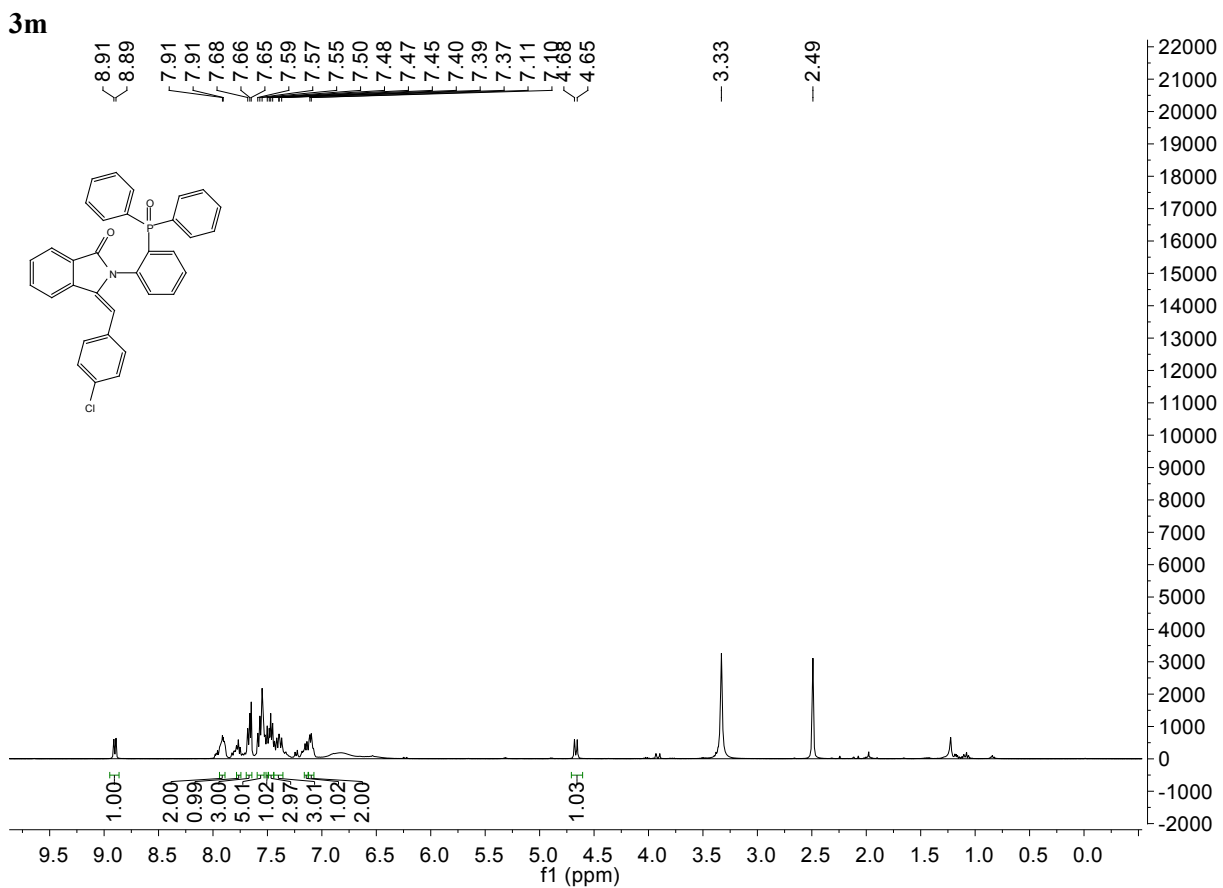

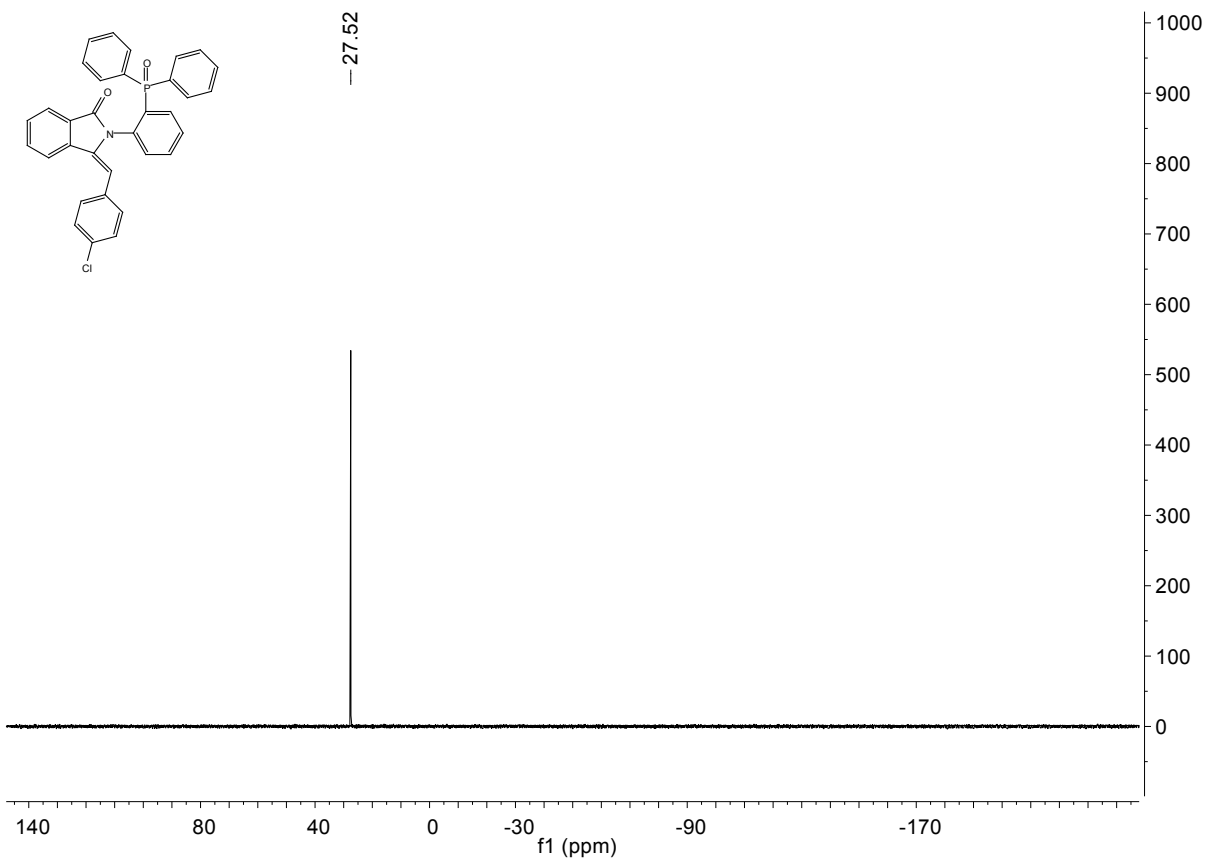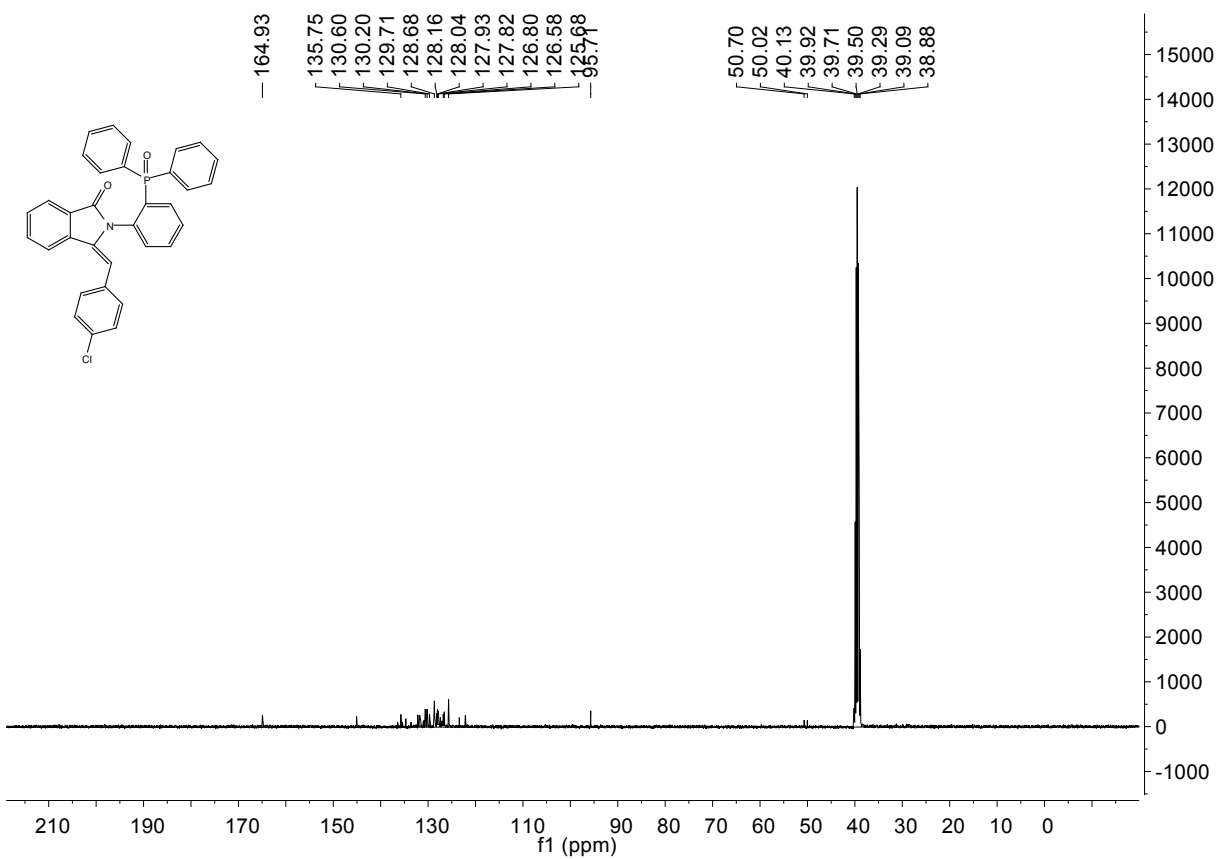



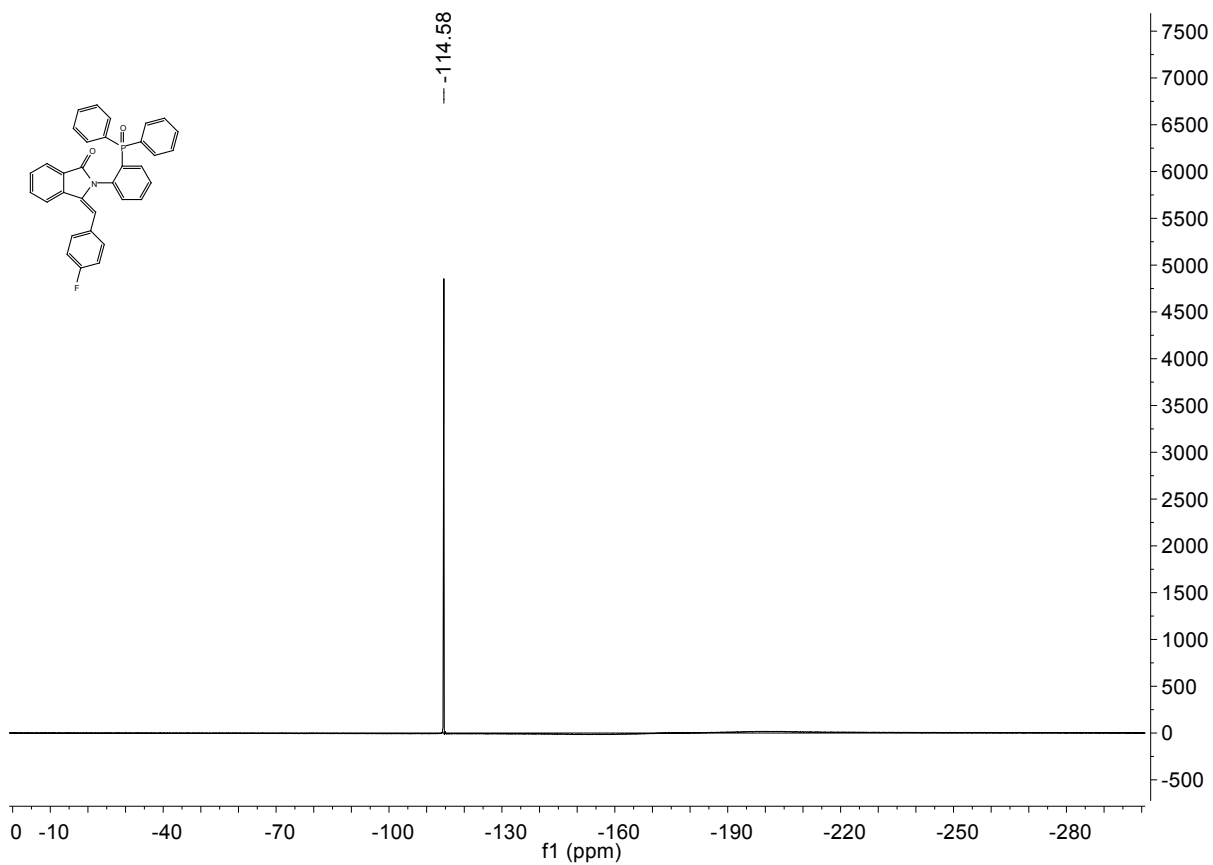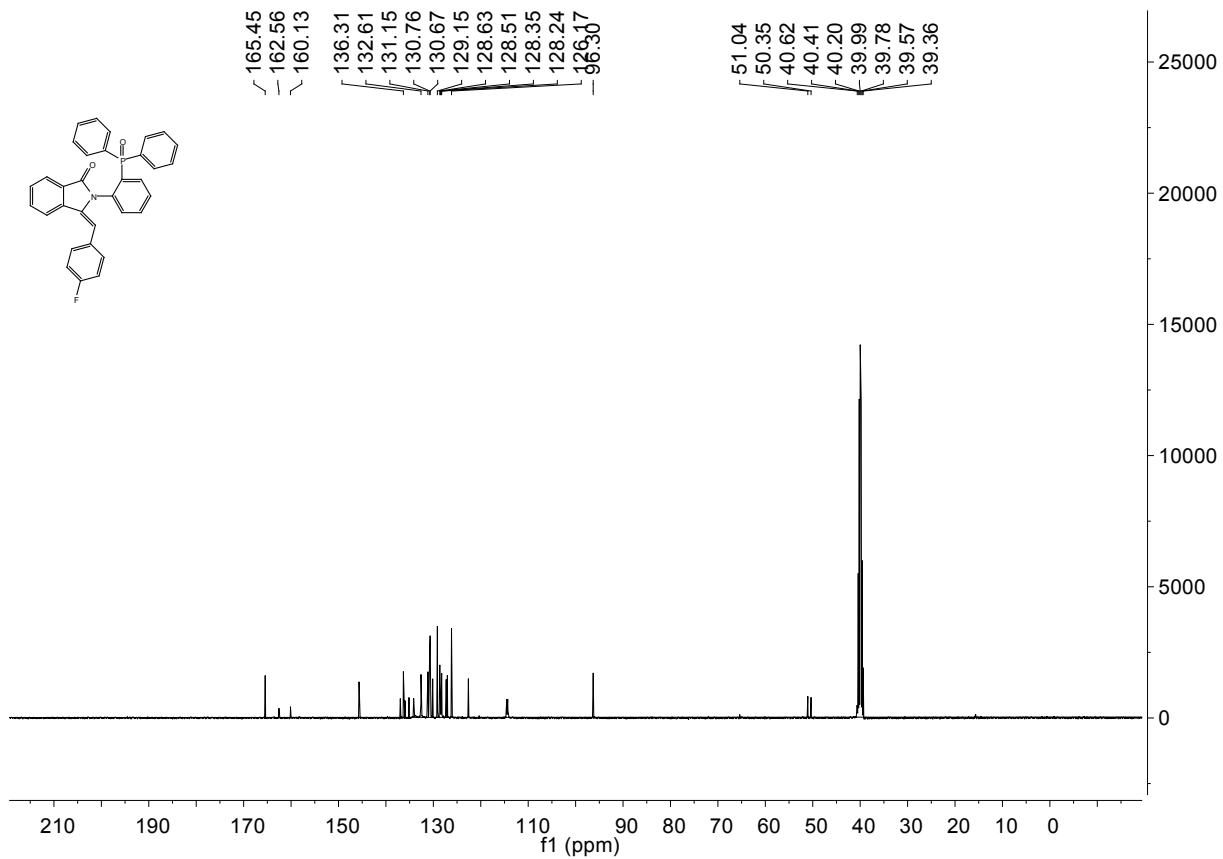

30

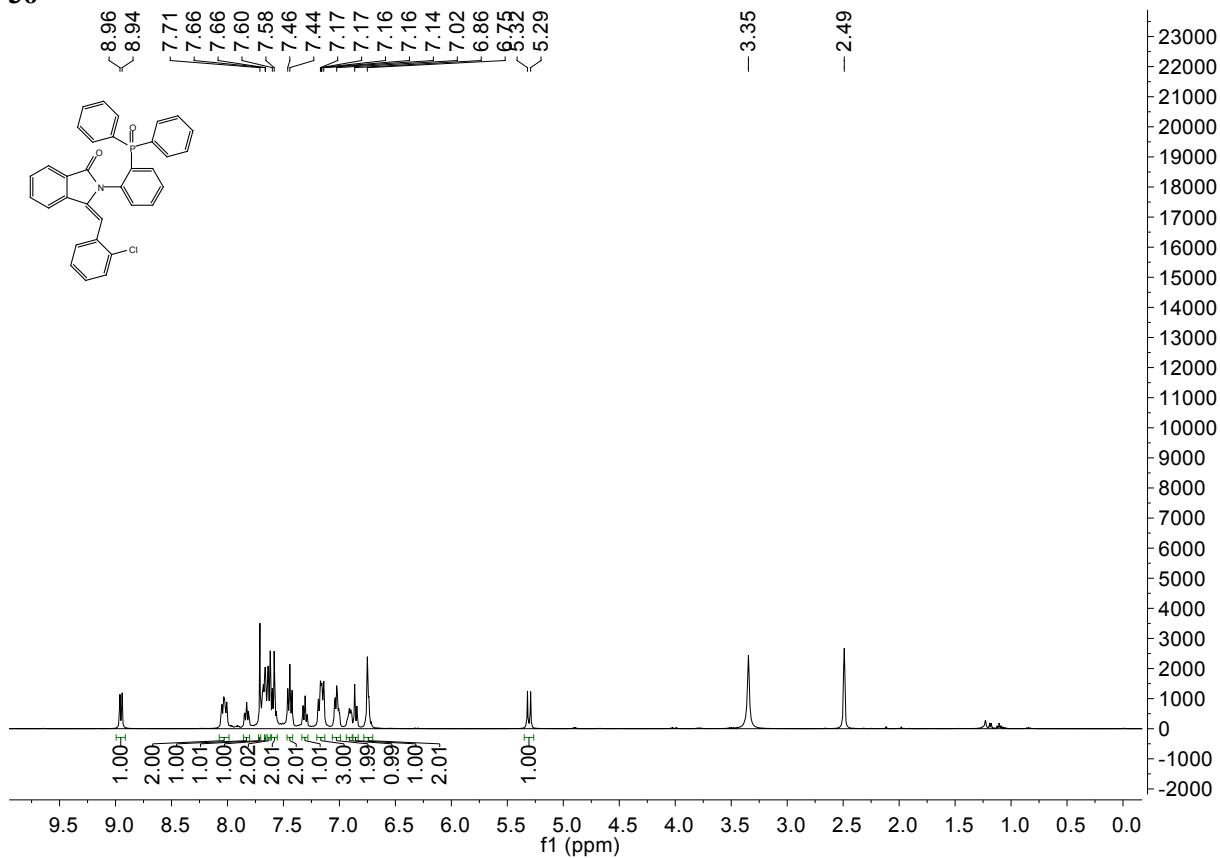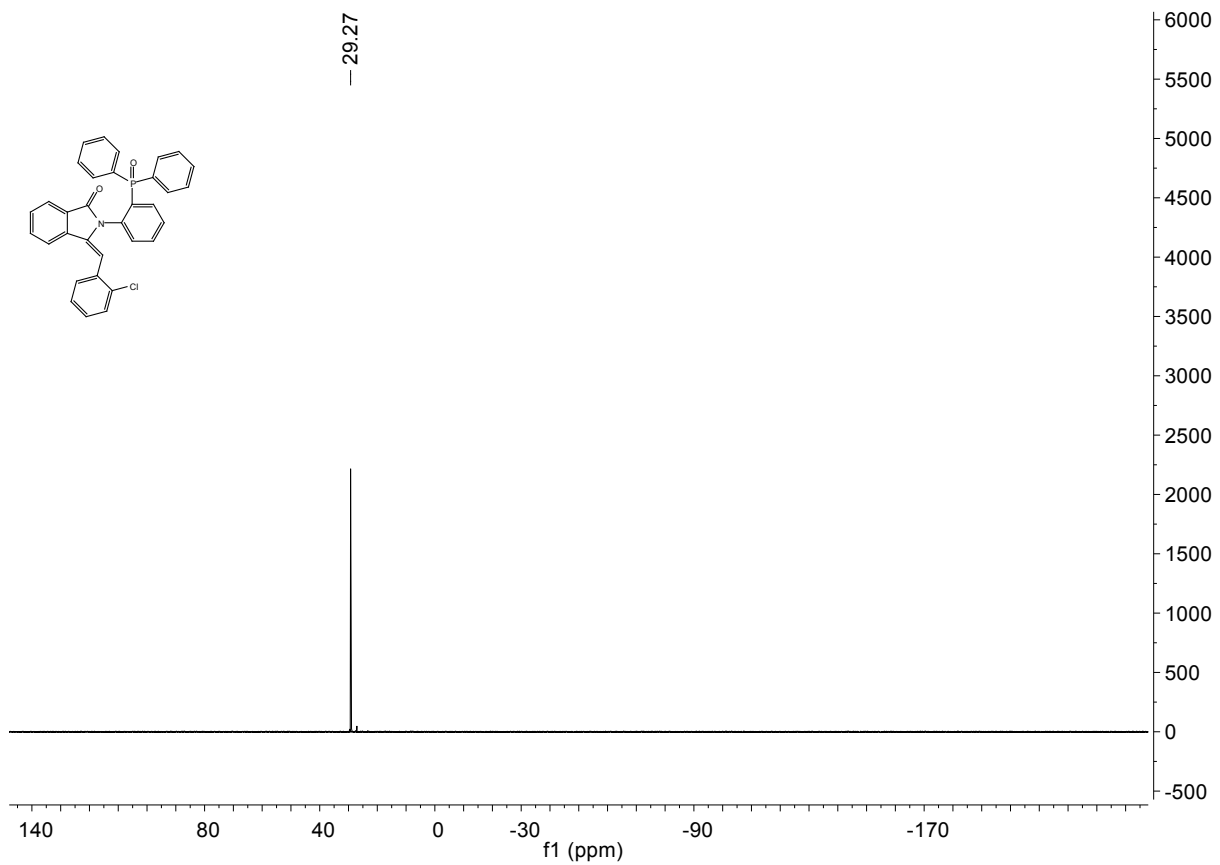

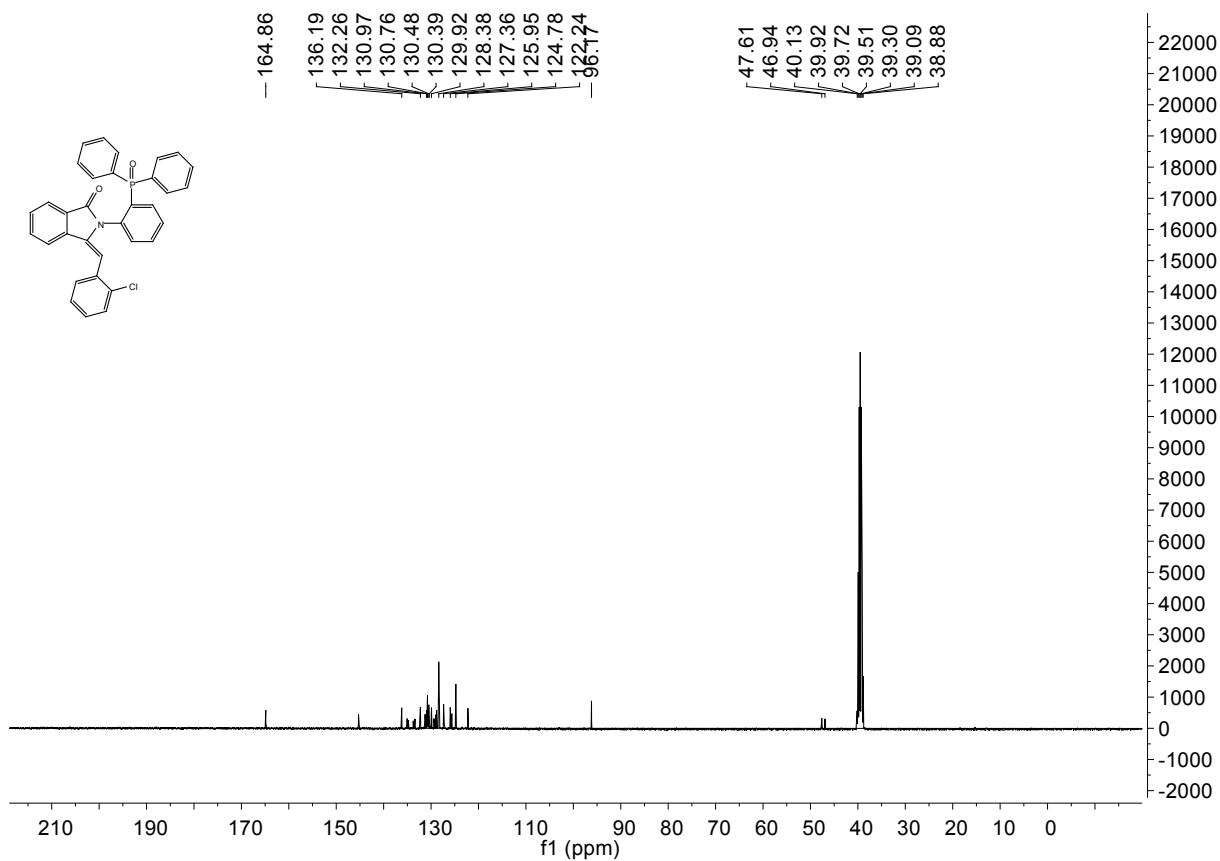

3p

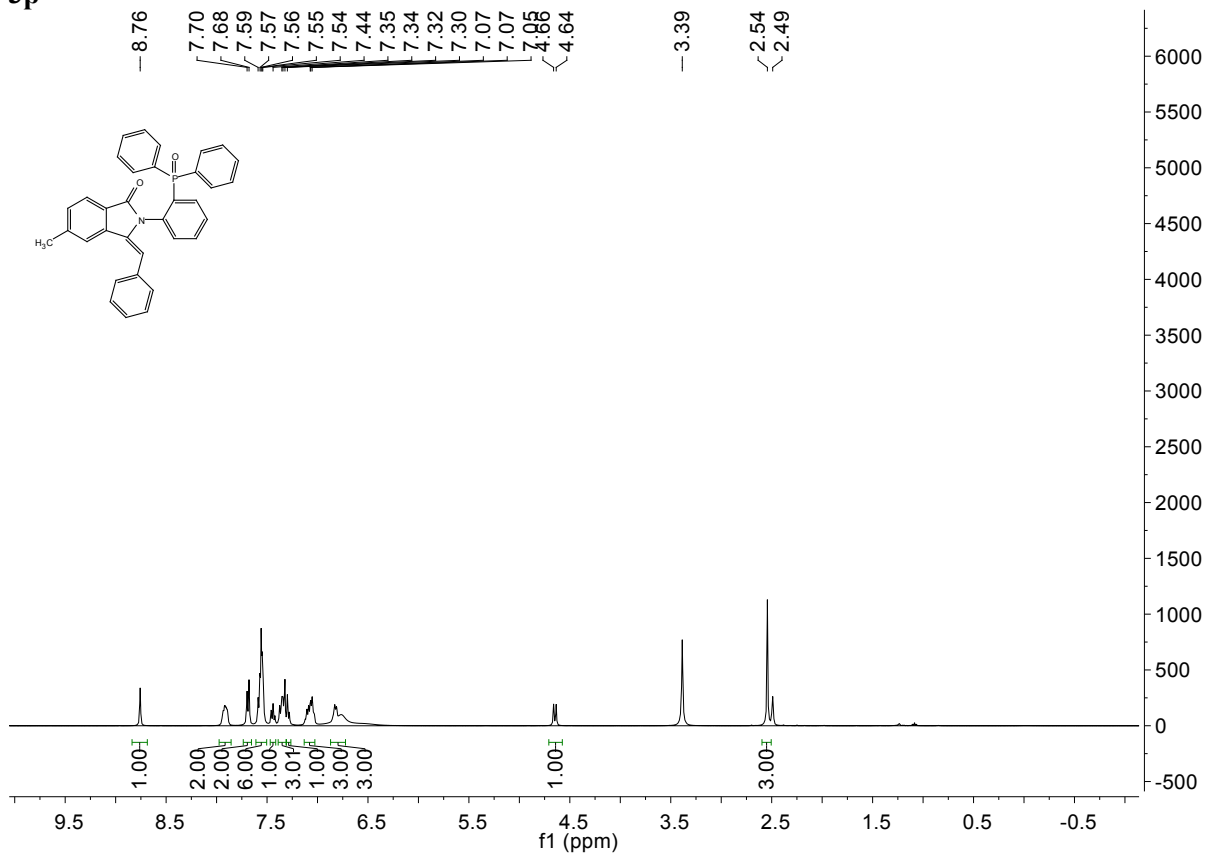



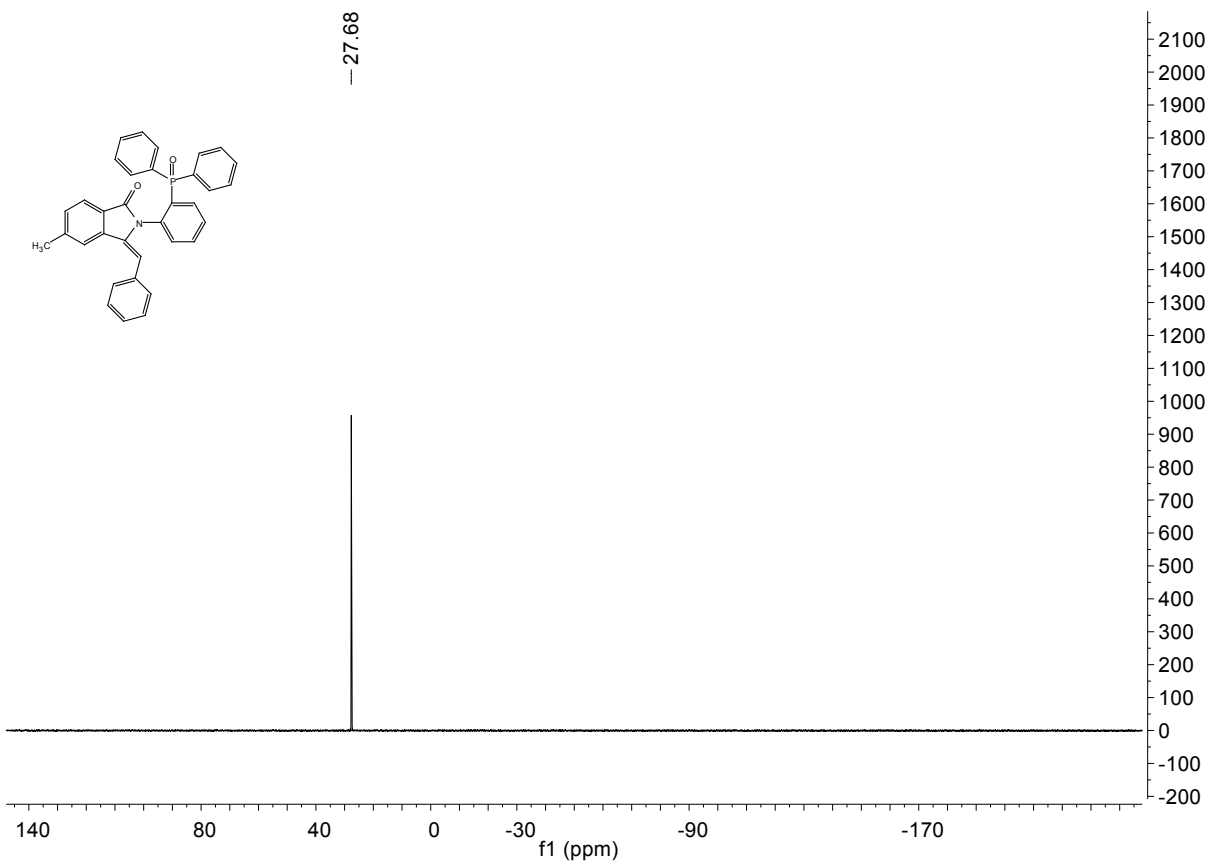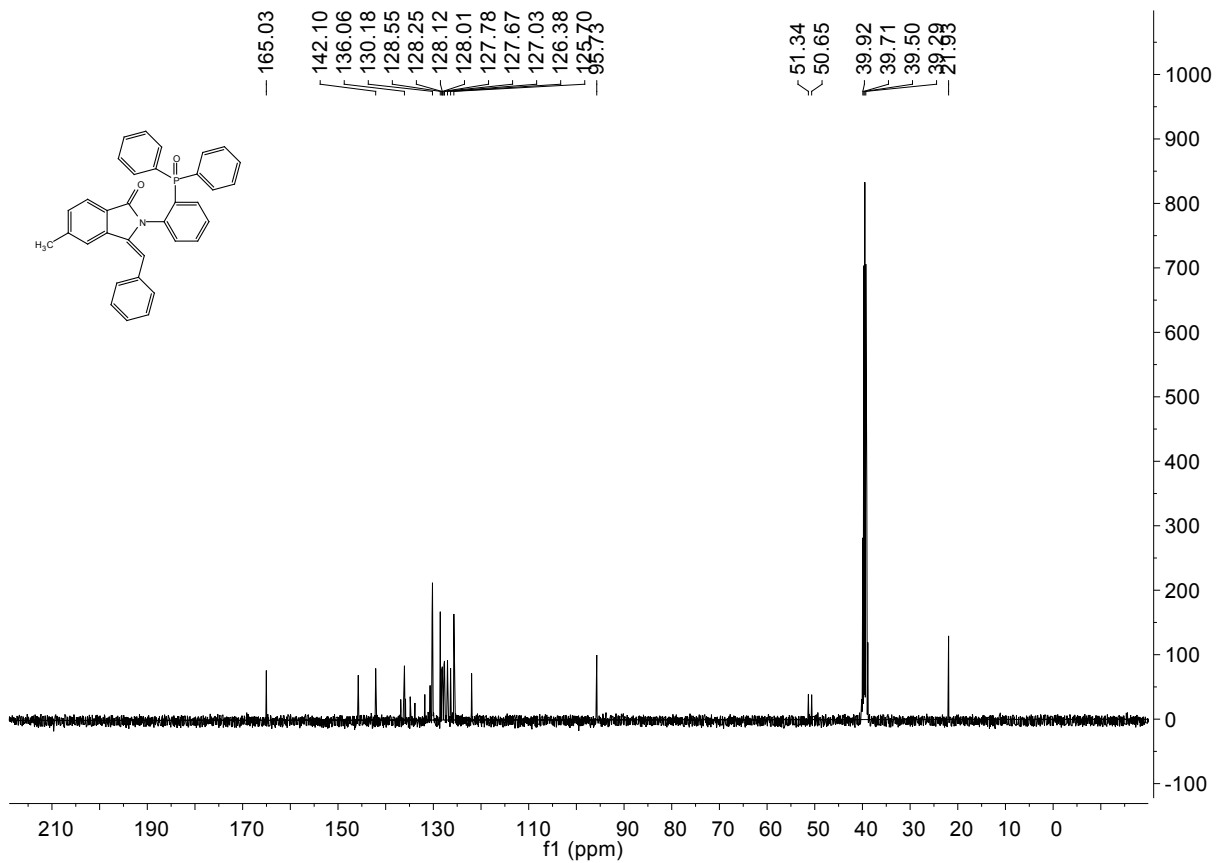

3q

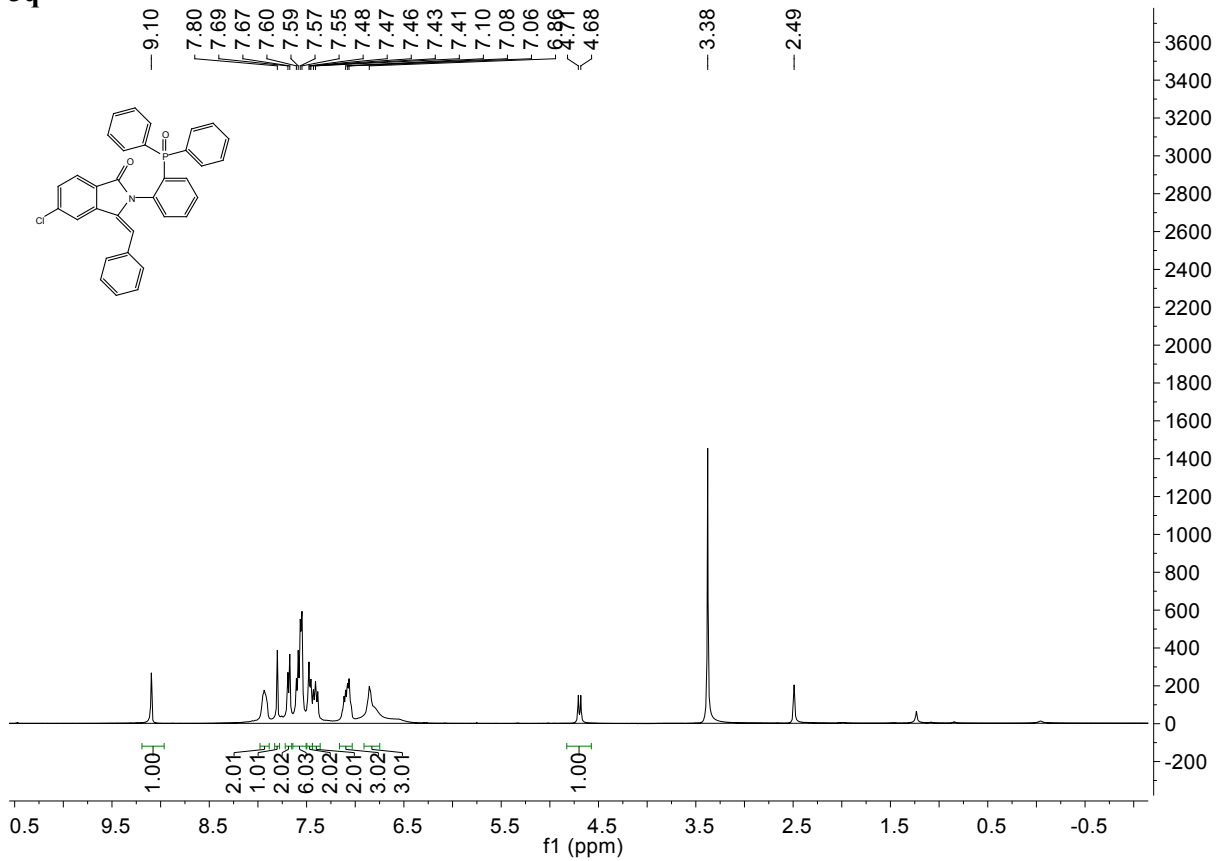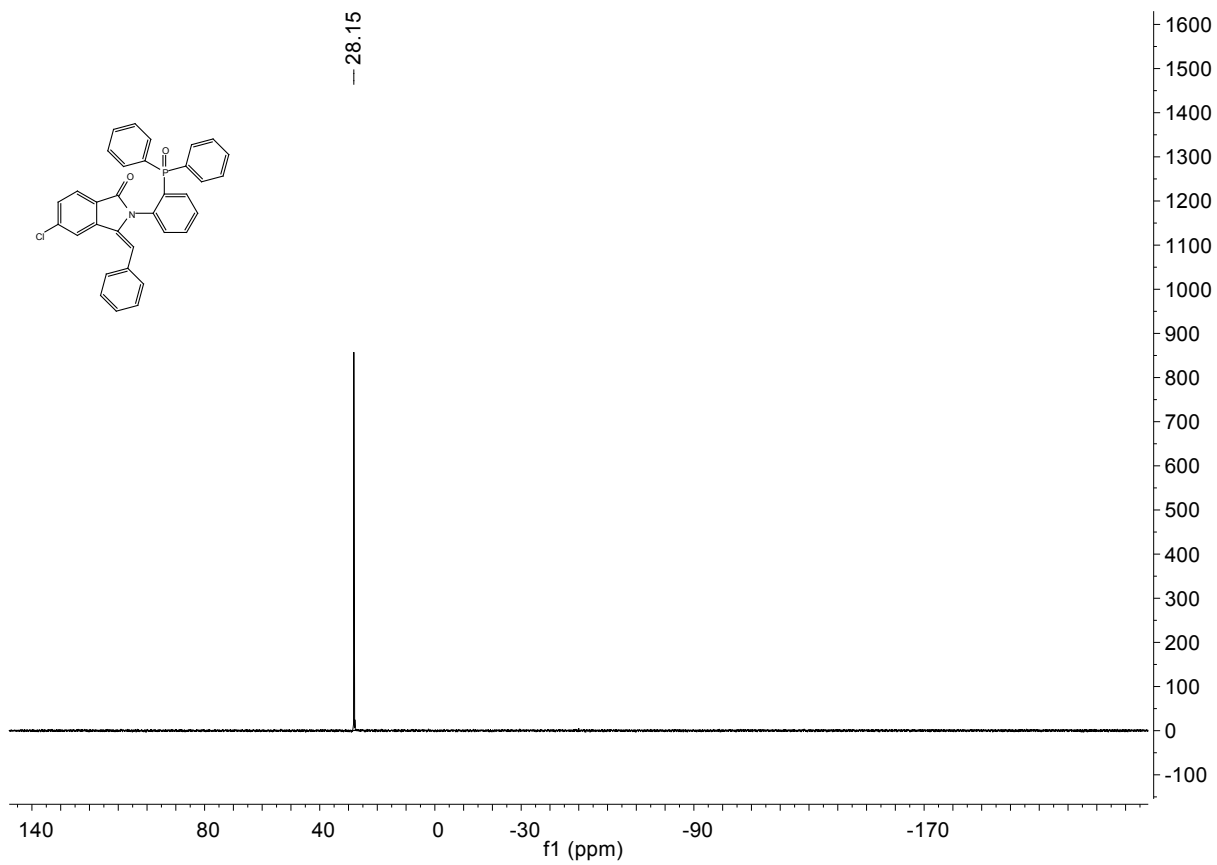

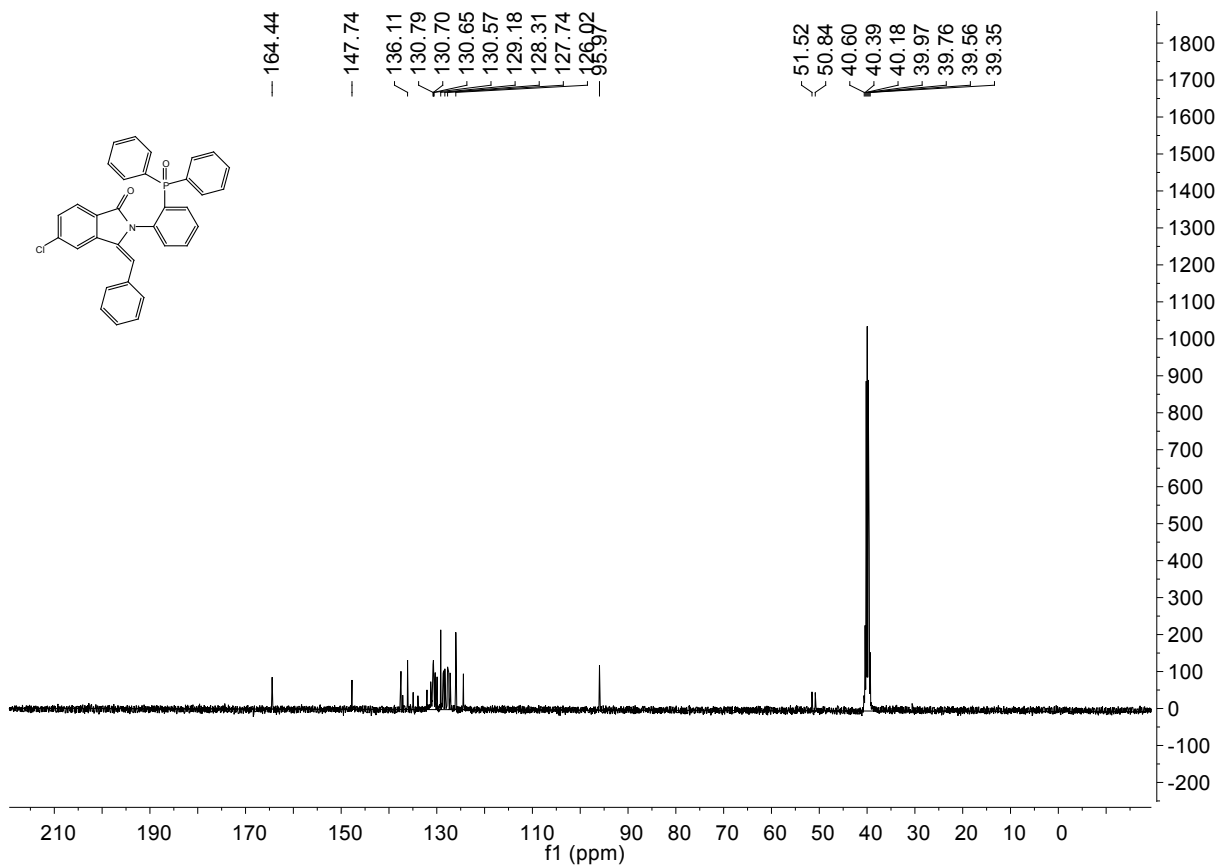

3r

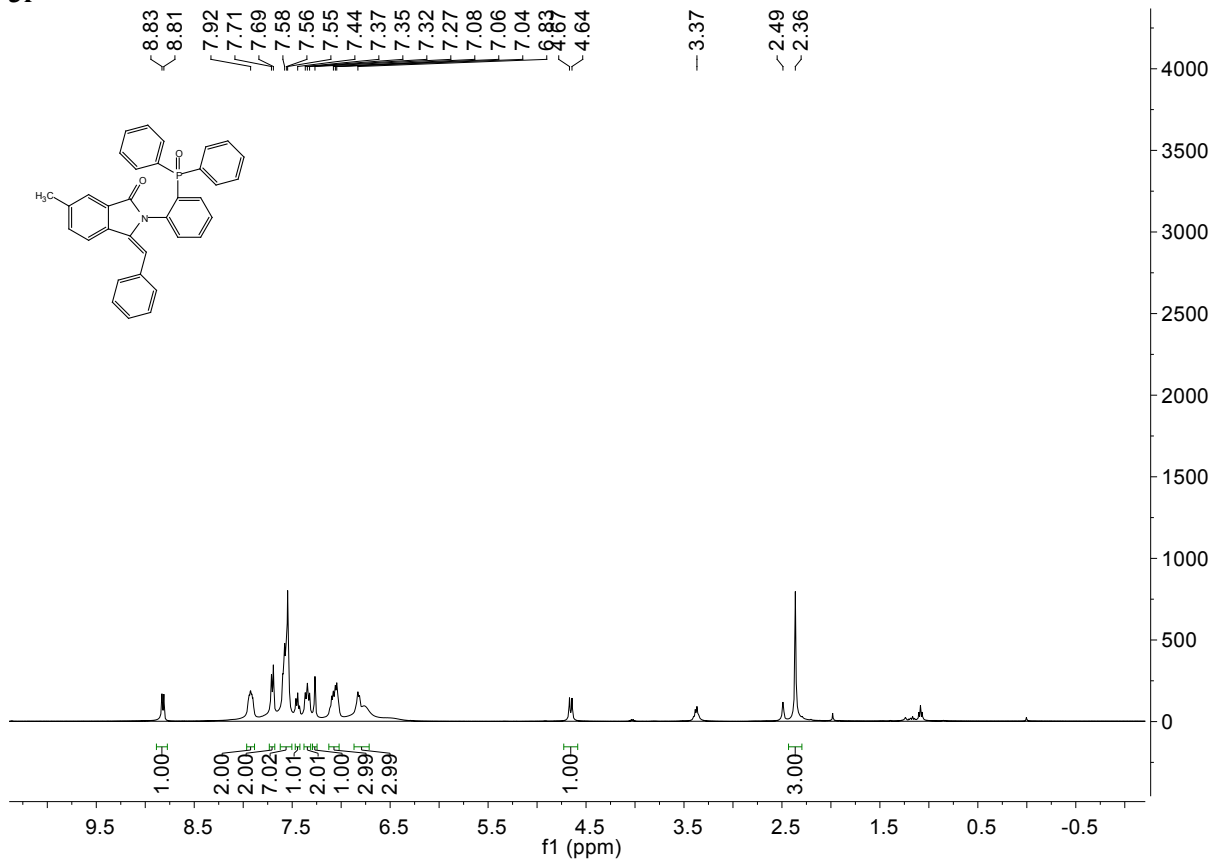

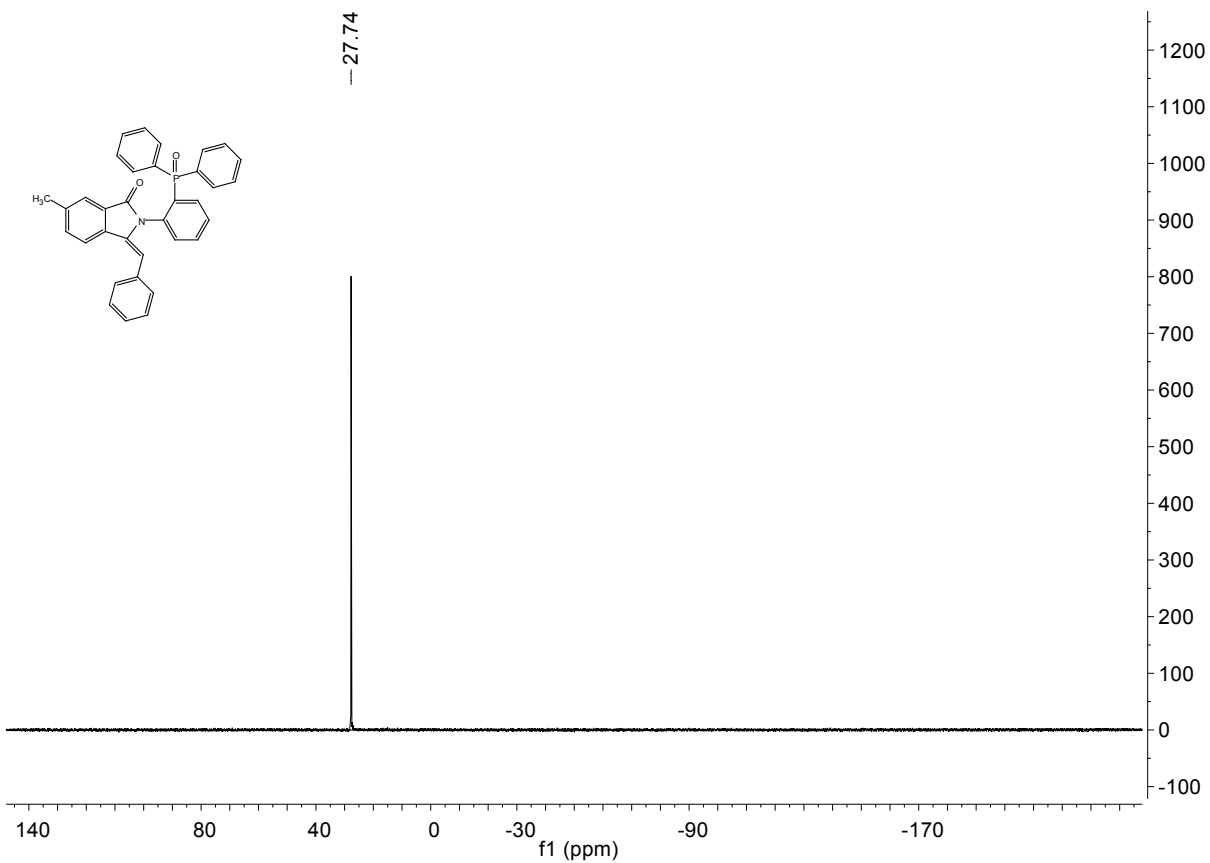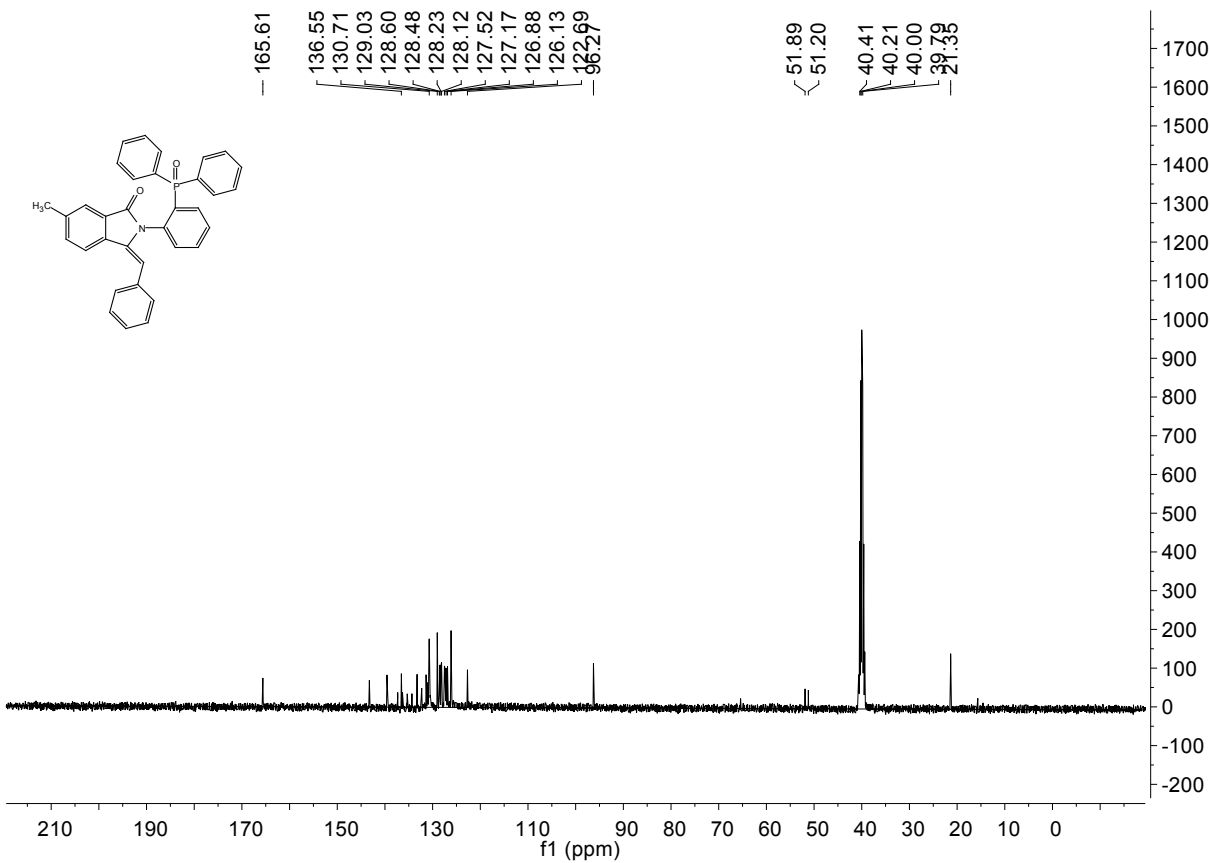

3s

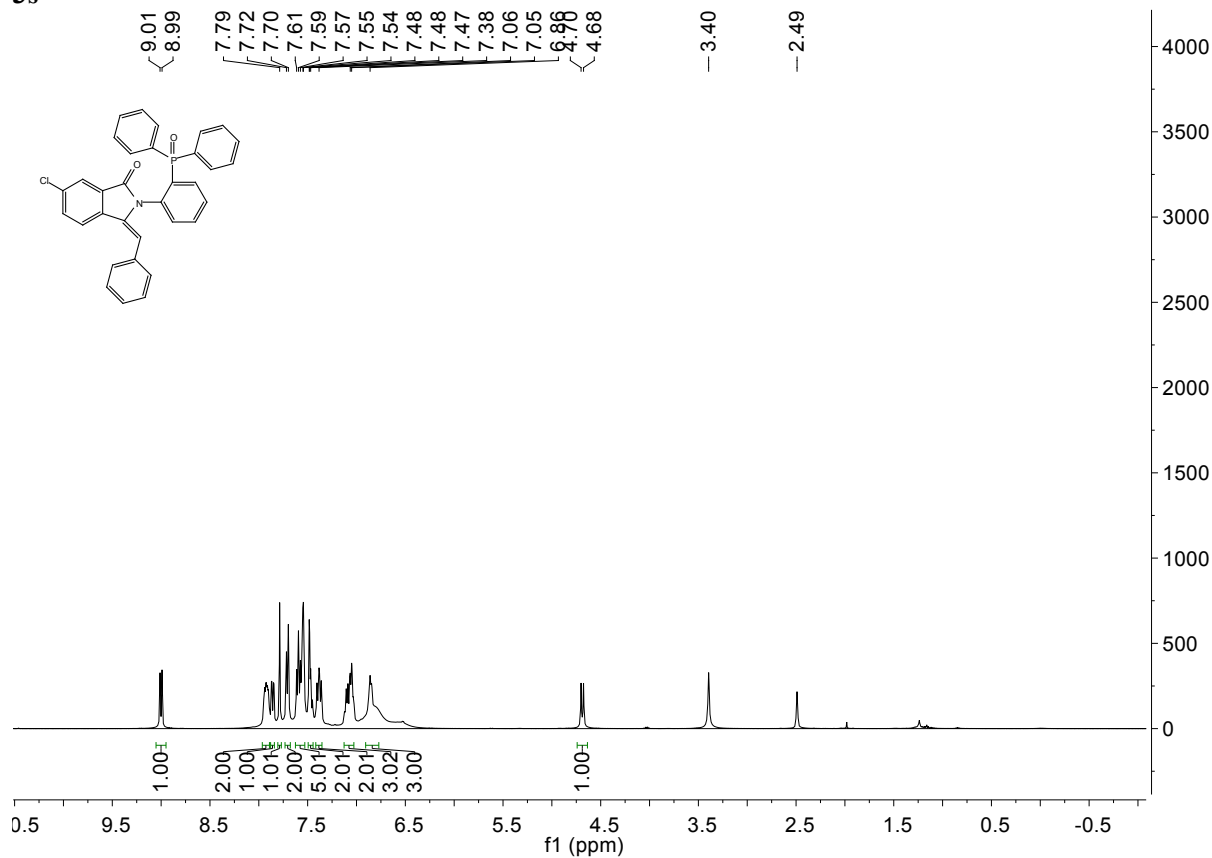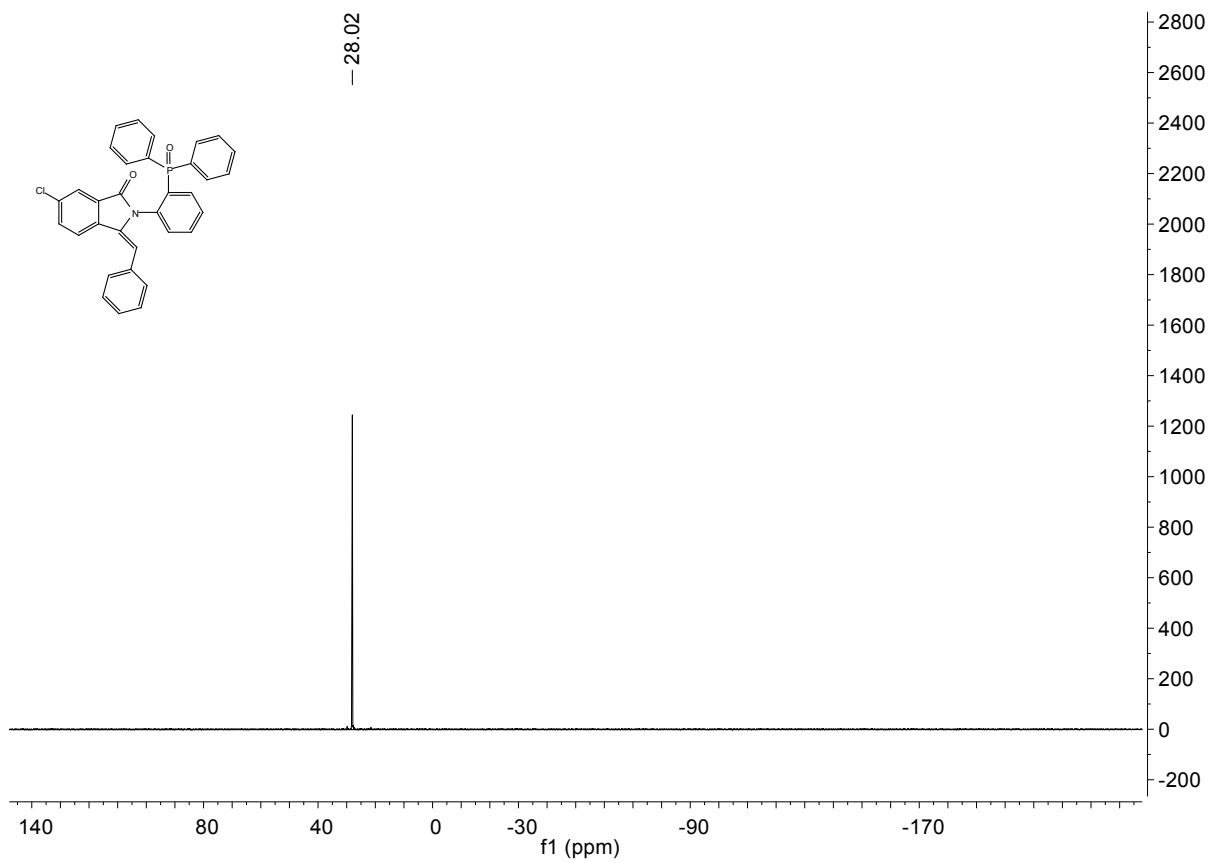

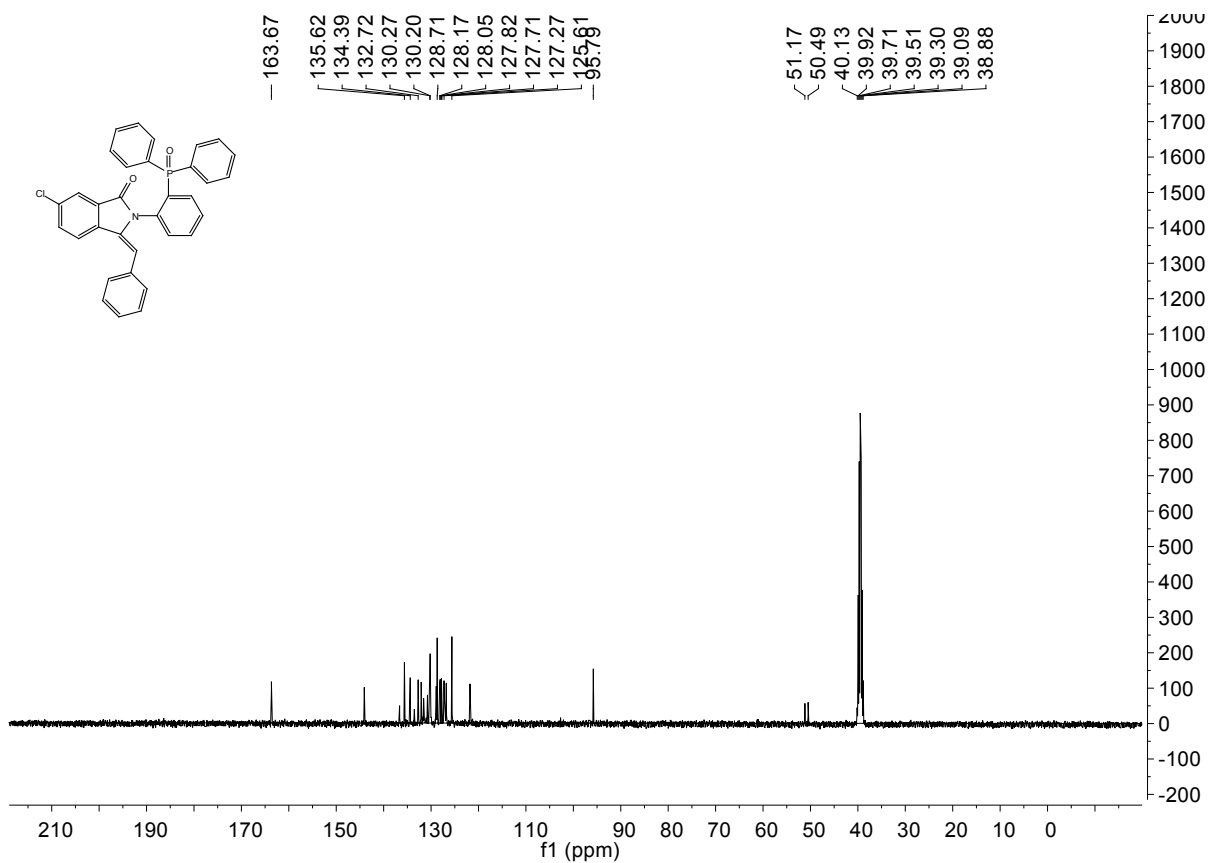

## 6. References:

[1] Li, M. W. Zhang, X. j. Jiang, Y. W. and Ma, D. *Organic Letters*, **2009**. *11*, 1309-1312.
